1 **Characterization of the antimicrobial activity of the cell-penetrating**  
2 **peptide TAT-RasGAP<sub>317-326</sub>**

3  
4

5 Maria Georgieva<sup>2,&</sup>, Tytti Heinonen<sup>1,&</sup>, Alessandra Vitale<sup>3</sup>, Simone Hargraves<sup>1</sup>, Senka  
6 Causevic<sup>1</sup>, Trestan Pillonel<sup>1</sup>, Leo Eberl<sup>3</sup>, Christian Widmann<sup>2,#</sup>, Nicolas Jacquier<sup>1,#,\*</sup>

7

8 1. Institute of Microbiology, Lausanne University Hospital and University of  
9 Lausanne, Switzerland

10 2. Department of Physiology, University of Lausanne, Switzerland

11 3. Department of Plant and Microbial Biology, University of Zurich, Switzerland

12

13 & These authors contributed equally to this work

14 # These authors share senior authorship

15 Running title: Study of TAT-RasGAP<sub>317-326</sub> antimicrobial activity

16

17 Keywords: Antimicrobial peptide, anticancer peptide, antibiotic resistance, TAT-RasGAP<sub>317-</sub>  
18 <sub>326</sub>, *Escherichia coli*, *Pseudomonas aeruginosa*

19

20

21 \*Corresponding author:

22

23 Dr. Nicolas Jacquier, Institute of Microbiology, Department of Pathology and Laboratory  
24 Medicine, CHUV, Bugnon 48, CH-1011 Lausanne, Switzerland

25 Phone: +41213148539 ; Fax: +41213144060 ; Email : nicolas.jacquier@chuv.ch

26

## 27 **Abstract**

28 Antimicrobial peptides (AMPs) are molecules with antimicrobial activity and could be a  
29 promising alternative to classical antibiotics, whose clinical efficiency is undermined by  
30 emergence of resistance. Our group is studying one such antibiotic alternative – the  
31 antimicrobial peptide TAT-RasGAP<sub>317-326</sub>. We recently reported the antimicrobial activity of this  
32 peptide against a range of Gram-positive and Gram-negative bacteria.

33 In this article, we show that the presence of divalent cations and low pH levels have an  
34 impact on TAT-RasGAP<sub>317-326</sub> activity, whereas serum proteins only partially reduce the  
35 antibacterial activity of TAT-RasGAP<sub>317-326</sub>. In addition, we show that iron supplementation  
36 reduces TAT-RasGAP<sub>317-326</sub> binding to bacteria. Using a transcriptomics approach and  
37 screening of bacterial mutant libraries, we map the transcriptional response of bacteria when  
38 exposed to TAT-RasGAP<sub>317-326</sub> and identify cellular pathways that may play a role in bacterial  
39 resistance to TAT-RasGAP<sub>317-326</sub>. We test combinations of TAT-RasGAP<sub>317-326</sub> with other  
40 AMPs and detect no evidence for an additive effect between any of the peptide combinations.  
41 Finally, we perform a resistance selection screen that reveals differences between bacterial  
42 strains with respect to their rate of resistance emergence against the TAT-RasGAP<sub>317-326</sub>  
43 peptide.

44 Taken together, our findings bring a better understanding of how extracellular factors  
45 might impact the antimicrobial activity of TAT-RasGAP<sub>317-326</sub> peptide and thus contribute basic  
46 biology insight into the mechanisms behind TAT-RasGAP<sub>317-326</sub> activity, potentially aiding  
47 future strategies to improve the efficiency of this peptide *in vivo*.

48

## 49 Introduction

50

51 The spread of antibiotic resistance in many bacterial species is severely limiting the  
52 benefits of antibiotics and a growing number of infections are becoming harder to treat [1].  
53 The issue is further compounded by the shortage of new classes of antibiotics that could  
54 potentially compensate for the expanding resistance to standard antibiotics. Therefore, there  
55 is a need for the development of alternative antimicrobials that could be used in the clinic to  
56 treat bacterial infections. One group of such alternative antimicrobials are antimicrobial  
57 peptides (AMPs), several of which are already in clinical trials, with promising results as  
58 antibiotic alternatives [2].

59 AMPs are naturally occurring peptides produced in many different organisms [2]. In  
60 bacteria, AMP production confers an advantage to the producing strain in the colonization of  
61 ecological niches [3]. In multicellular organisms, AMPs such as human cathelicidin LL-37 and  
62 bovine bactenecin are generally a part of the innate immune system [4].

63 AMPs have several properties that make them attractive alternatives to antibiotics. These  
64 include their wide diversity, their relatively simple structure, and the possibility to bioengineer  
65 these peptides. Altogether, there are thousands of AMPs described in the literature and this  
66 diversity of AMPs is an attractive resource that may allow targeting a wide range of infections  
67 [5]. Indeed, there are examples of AMPs that can target both Gram-positive and Gram-  
68 negative bacteria [2]. Owing to their peptide nature, AMPs are amenable to bioengineering,  
69 which enables the targeted manipulation of the peptide gene (if naturally occurring) or  
70 complete chemical synthesis of the desired peptide. Such manipulations can increase peptide  
71 specificity and efficiency, as well as introduce favorable pharmacokinetic properties that would  
72 improve potential clinical application of the peptide.

73 AMPs are quite diverse, however, they possess a number of shared features. AMPs are  
74 usually short peptides consisting of 10-50 amino acids, display an overall positive charge and  
75 are rich in cationic and hydrophobic amino acids. While the mechanisms of action (MOA) of

76 AMPs against pathogens vary depending on the type of peptide, a common feature of the  
77 antimicrobial activity of AMPs seems to be the electrostatic interaction between the positively  
78 charged peptide and the negatively charged bacterial surface. For example, melittin, isolated  
79 from bee venom [6] and LL-37, part of the human innate immune system [7] have been shown  
80 to disrupt bacterial membrane integrity and cause pore formation [2]. Another AMP, the  
81 circularized polypeptide polymyxin B, derived from the Gram-positive bacterium *Bacillus*  
82 *polymyxa*, is also positively charged and able to permeabilize bacterial membranes [8].

83 For any antimicrobial with potential clinical application, we must consider the possibility  
84 of emergence of resistance. While rate of resistance to AMPs seems to be lower than the rate  
85 at which resistance to classic antibiotics arises, recent studies indicate that this process is  
86 more common than previously hypothesized, indicating that a careful evaluation of conditions  
87 favoring resistance towards AMPs is required prior to any systemic distribution of these  
88 compounds [9, 10]. It is thus essential to study not only the MOA of AMPs but also investigate  
89 any resistance mechanisms against them and thus define the best conditions that allow the  
90 safe use of these compounds.

91 Our group recently reported the discovery of the novel antimicrobial activity of the cell-  
92 penetrating peptide TAT-RasGAP<sub>317-326</sub>, a cationic peptide of 22 amino acids. We showed its  
93 activity towards a broad spectrum of both Gram-positive and Gram-negative bacteria *in vitro*  
94 [11]. Initial studies on TAT-RasGAP<sub>317-326</sub> by our group highlighted its anticancer activity. We  
95 outlined its ability to both sensitize cancer cells to chemotherapy and directly kill cancer cells  
96 [12-16]. Previous research has shown that sensitization by this peptide occurs independently  
97 of caspases, apoptosis and necroptosis [14, 16], but requires p53 and PUMA [12].  
98 Furthermore, we have identified that the WXW motif within the peptide sequence is required  
99 for both the anticancer and antimicrobial activities of TAT-RasGAP<sub>317-326</sub> [11, 17]. While we  
100 have begun to dissect the MOA of TAT-RasGAP<sub>317-326</sub>, we still lack a comprehensive  
101 understanding of the mechanisms behind its antimicrobial and anticancer effects.

102 Despite its potent *in vitro* antimicrobial activity, TAT-RasGAP<sub>317-326</sub> showed limited activity  
103 *in vivo* in a mouse model of *Escherichia coli* (*E. coli*) induced peritonitis [11]. This could be

104 due to environmental factors, such as binding to serum proteins, presence of chemicals or pH  
105 variations on the activity of TAT-RasGAP<sub>317-326</sub>, as reported for other AMPs [18]. A better  
106 understanding of the MOA of TAT-RasGAP<sub>317-326</sub> and a careful investigation of factors  
107 influencing its activity would address this possibility. Insights from such investigations would  
108 also aid at developing strategies to improve the activity of this peptide *in vivo*, either through  
109 designing improved peptide-specific methods to deliver the peptide directly to the desired site  
110 of action or chemical modifications of the peptide itself to boost its activity. Altogether, these  
111 efforts will improve the potential of TAT-RasGAP<sub>317-326</sub> for the treatment of bacterial infections.

112 In this report, we studied the conditions required for TAT-RasGAP<sub>317-326</sub> to be efficient  
113 against bacteria in order to understand how we may improve the *in vivo* efficacy of this peptide.  
114 We first determined the effect of culture medium composition and pH levels on TAT-  
115 RasGAP<sub>317-326</sub> peptide activity. We then performed RNA sequencing (RNA-Seq) to investigate  
116 the transcriptional response of *E. coli* to the peptide. Finally, we assessed which pathways are  
117 required for TAT-RasGAP<sub>317-326</sub> activity by performing screenings of the Keio collection  
118 composed of *E. coli* single gene deletion mutants and of a *Pseudomonas aeruginosa* PA14  
119 (*P. aeruginosa*) transposon mutant library.

120 We show that TAT-RasGAP<sub>317-326</sub> antibacterial activity is reduced in the presence of  
121 buffering compounds, low pH levels and high concentrations of divalent cations, but is  
122 unaffected by albumin. TAT-RasGAP<sub>317-326</sub> modifies the transcriptional landscape of *E. coli*,  
123 thereby inducing stress responses, especially through the activation of two-component  
124 systems, and altering the expression of several metabolic, membrane and ribosomal genes.  
125 Moreover, mutations affecting the two-component system repertoire increase sensitivity of  
126 bacteria to TAT-RasGAP<sub>317-326</sub> peptide. Because TAT-RasGAP<sub>317-326</sub> displays no additive  
127 effect with other AMPs we test here, it is likely TAT-RasGAP<sub>317-326</sub> and these AMPs have  
128 distinct MOAs. Finally, selection of strains resistant towards TAT-RasGAP<sub>317-326</sub> indicates that  
129 resistance to this peptide can occur and can lead to increased resistance to other AMPs.  
130 Taken together, these results provide a better understanding of the effects of TAT-RasGAP<sub>317-</sub>

131 <sup>326</sup> on bacteria, which may open new research lines towards possible applications of TAT-  
132 RasGAP<sub>317-326</sub> peptide.

133

## 134 Results

### 135 Divalent cations in culture medium impact sensitivity of *E. coli* and *P. aeruginosa* to 136 TAT-RasGAP<sub>317-326</sub> peptide

137 To investigate the antimicrobial properties of TAT-RasGAP<sub>317-326</sub>, we studied the effect of  
138 the peptide on the two well-characterized laboratory strains *E. coli* MG1655 and *P. aeruginosa*  
139 PA14. First, we determined the minimal inhibitory concentrations (MICs) of TAT-RasGAP<sub>317-  
140 <sup>326</sup> peptide in LB medium for both *E. coli* and *P. aeruginosa* and determined these to be 8  $\mu$ M  
141 and 32  $\mu$ M respectively (Fig. 1A-B). Since *in vivo* conditions can vary regarding pH levels,  
142 nutrient availability, salt and protein concentrations, we investigated the effect of medium  
143 composition on the antimicrobial activity of the TAT-RasGAP<sub>317-326</sub> peptide. For both *E. coli*  
144 and *P. aeruginosa*, we measured MIC in BM2 medium containing either 2 mM (Mg<sup>high</sup>) or 20  
145  $\mu$ M (Mg<sup>low</sup>) MgSO<sub>4</sub> [19]. Interestingly, while MICs of both *E. coli* and *P. aeruginosa* were  
146 comparable between LB and BM2 Mg<sup>high</sup> (Fig. 1C-D), we observed a drastic 8-times decrease  
147 of MIC in BM2 Mg<sup>low</sup> medium (Fig. 1E-F). In contrast, low magnesium was reported to increase  
148 the MIC of polymyxin B, a well-described AMP, through induction of modifications of outer  
149 membrane composition and LPS structure in *P. aeruginosa* [20]. In line with these findings,  
150 we measured a 4-fold increase in polymyxin B MIC against *P. aeruginosa* but not *E. coli* in  
151 BM2 Mg<sup>low</sup> medium compared to BM2 Mg<sup>high</sup> (Fig. S1A-D). Taken together, these results  
152 indicate possible differences in the binding properties of TAT-RasGAP<sub>317-326</sub> to the bacterial  
153 surface in comparison to polymyxin B.</sub>

154 Because high magnesium concentration affects TAT-RasGAP<sub>317-326</sub> efficiency in BM2  
155 medium, we hypothesized that a similar effect could be observed in complex LB medium  
156 supplemented with 2 mM MgSO<sub>4</sub>. To address this hypothesis, we supplemented LB medium  
157 with 2 mM MgSO<sub>4</sub> and tested the antimicrobial activity of TAT-RasGAP<sub>317-326</sub> against *E. coli*

158 and *P. aeruginosa* in these conditions. In our experiments, magnesium supplementation  
159 lowered the activity of TAT-RasGAP<sub>317-326</sub> against both *E. coli* and *P. aeruginosa* (Fig. S1E-  
160 H). To determine whether the effect of high MgSO<sub>4</sub> concentration was caused by the presence  
161 of magnesium ions, sulfate counter ions or rather due to a change in medium osmolarity, we  
162 tested the activity of TAT-RasGAP<sub>317-326</sub> peptide in LB media supplemented with various salts.  
163 We observed a similar drop in activity of the peptide in presence of 2 mM Mg<sup>2+</sup>, Fe<sup>2+</sup> or Ca<sup>2+</sup>,  
164 both as sulfate and chloride salts (Fig. S2A-E). Ammonium sulfate did not affect the activity of  
165 TAT-RasGAP<sub>317-326</sub> peptide (Fig. S2F), suggesting that the presence of divalent cations, but  
166 not sulfate ions or changes in osmolarity have an effect on TAT-RasGAP<sub>317-326</sub> activity. To  
167 quantify peptide uptake, we incubated bacteria with a FITC-labelled version of the peptide and  
168 assessed fluorescent signal via flow cytometry. Addition of Trypan Blue (TB), an efficient  
169 quencher of extracellular fluorescence, to the bacterial sample labelled with FITC-TAT-  
170 RasGAP<sub>317-326</sub> revealed the specific accumulation of intracellular peptide. TB has been  
171 demonstrated to quench the fluorescence of FITC-labelled compounds [21-23]. According to  
172 its properties, TB is unable to pass the membrane of intact cells and is therefore unable to  
173 quench intracellular fluorescence [24]. We verified this with bacteria incubated with FITC-  
174 TAT-RasGAP<sub>317-326</sub> at 37°C, whose fluorescence was decreased but not completely abolished  
175 after quenching with TB (Fig. 2G and 2H). In contrast, fluorescence of bacteria incubated with  
176 FITC-TAT-RasGAP<sub>317-326</sub> on ice, a condition where entry is inhibited and only surface binding  
177 occurs, is completely abolished after quenching with TB (Fig. 2G and 2H). Using this  
178 experimental strategy, we showed that Fe<sup>2+</sup> supplementation inhibited entry of the peptide  
179 (Fig. S2G). In contrast, supplementation with Mg<sup>2+</sup> or Ca<sup>2+</sup> did not have effect on peptide  
180 adhesion and entry (Fig. S2G).

181

### 182 **pH level and presence of buffering compounds in LB medium have an impact on TAT-** 183 **RasGAP<sub>317-326</sub> antimicrobial activity**

184 Besides salt concentration, pH levels can also vary across different *in vivo* conditions and  
185 can influence the activity of AMPs [18]. To determine whether pH level of the culture medium



186 influences the activity of the TAT-RasGAP<sub>317-326</sub> peptide, we used the buffering compound 2-  
187 (N-morpholino)ethanesulfonic acid (MES) [25] to create LB media with varying pH levels (pH  
188 5.5, pH 6.0, pH 6.5 and pH 7.0). We confirmed that pH is stable in presence of buffering agent  
189 (Table S1). We found that peptide activity against both *E. coli* and *P. aeruginosa* is reduced  
190 at low pH (Fig. 2A-D and S3A-D). To address the possibility that low pH has an effect on TAT-  
191 RasGAP<sub>317-326</sub> peptide integrity, we preincubated the peptide at pH 5.5 prior to testing its  
192 activity against bacteria in LB medium pH 7.0. We found pre-incubation had no effect (Fig.  
193 S4A), suggesting that the decreased activity of TAT-RasGAP<sub>317-326</sub> against bacteria in low pH  
194 medium is due to a physiological adaptation of the bacteria and not to decreased peptide  
195 stability. Intriguingly, we also found that peptide activity was reduced in LB medium buffered  
196 with MES compared to non-buffered LB medium (Fig. 2D-E and S3D-E). This change might  
197 depend on the buffering effect of MES or differences in the osmolarity of the media. To  
198 determine whether a change in osmolarity is sufficient to affect peptide activity, we  
199 supplemented LB with the non-metabolizable sugar sorbitol at same concentration as MES  
200 (100 mM) but could not observe any effect on TAT-RasGAP<sub>317-326</sub> activity (Fig. 2F and S3F).  
201 We then investigated the effect of pH on peptide binding using flow cytometry. We performed  
202 this experiment on ice, which blocks entry of the peptide (Fig. 2H). We determined that  
203 incubation at pH 5.5, but not addition of MES, lowered the binding of FITC-labelled TAT-  
204 RasGAP<sub>317-326</sub> to *E. coli* cells (Fig. 2G). In addition, the proportion of bacteria showing  
205 internalization of FITC-labelled TAT-RasGAP<sub>317-326</sub> was lower at pH 5.5 than at pH 7.0 (Fig.  
206 S4B). The effect of medium buffering on peptide activity seems to be specific for TAT-  
207 RasGAP<sub>317-326</sub>, since the activity of polymyxin B was not affected by supplementation of  
208 medium with MES (Fig. S3G-L). Interestingly, low pH affected the activity of polymyxin B on  
209 *P. aeruginosa* (Fig. S3G), but had only a minor effect on *E. coli* sensitivity to polymyxin B (Fig.  
210 S3J).

211

212 **Serum and albumin have a mild effect on the antimicrobial activity of TAT-RasGAP<sub>317-</sub>**

213 326



214 It has been previously reported that serum albumin can bind to AMPs and thus lower their  
215 activity *in vivo* [26, 27]. To examine the effect of albumin on TAT-RasGAP<sub>317-326</sub>, we tested the  
216 activity of the peptide in the presence of either bovine serum albumin (BSA) or fetal calf serum  
217 (FCS) and compared this to TAT-RasGAP<sub>317-326</sub> activity alone. BSA and FCS moderately  
218 increased (2 to 4 times) the MIC of TAT-RasGAP<sub>317-326</sub> on *E. coli* (Table1). Melittin was inactive  
219 at the maximal tested concentration (256 µg/ml) in presence of 50% FCS or 50 mg/ml BSA.  
220 Our results indicate that the presence of albumin has a mild effect on the antimicrobial activity  
221 of TAT-RasGAP<sub>317-326</sub>.

222

### 223 **TAT-RasGAP<sub>317-326</sub> is bactericidal against *E. coli* and *P. aeruginosa***

224 Our measurements of the MIC of TAT-RasGAP<sub>317-326</sub> peptide (Fig. 1) are based on the  
225 optical density method, which measures culture turbidity associated directly with bacterial  
226 growth. However, the optical signal at OD<sub>600</sub> measures turbidity due to both live bacteria as  
227 well as dead bacterial debris in the culture medium. Moreover, we may not be able to  
228 differentiate a bacteriostatic from a bactericidal agent using this technique, since both would  
229 block proliferation and would result in very low turbidity. To quantify the number of bacteria  
230 that survive incubation with TAT-RasGAP<sub>317-326</sub>, we determined the number of colony-forming  
231 units in a bacterial culture exposed to peptide. For *E. coli*, we observed a stable number of  
232 surviving bacteria through the entire experiment with 10 µM of the peptide, which is consistent  
233 with the observation that this concentration is approximately the MIC as determined by  
234 measuring the optical density. In contrast, a decrease in bacterial viability was observed at  
235 peptide concentrations higher than or equal to 15 µM, suggesting the peptide is bactericidal  
236 at these concentrations (Fig. 3A). We performed a similar experiment with *P. aeruginosa* in  
237 BM2 Mg<sup>low</sup> medium where we observed growth inhibition and decreased bacterial viability at  
238 1 µM and 2 µM TAT-RasGAP<sub>317-326</sub>, respectively (Fig. 3B). Interestingly, TAT-RasGAP<sub>317-326</sub>  
239 peptide had slower time-kill kinetics against *E. coli* than polymyxin B, an antibacterial agent,  
240 which is known to act by membrane permeabilization [28] (Fig. 3C). Similarly, TAT-RasGAP<sub>317-</sub>

241 <sup>326</sup> killed *P. aeruginosa* more slowly than polymyxin B (Fig. 3D). We determined that killing of  
242 *E. coli* was accompanied by an accumulation of fluorescent TAT-RasGAP<sub>317-326</sub> peptide in the  
243 cytosol (Fig. 3E) and by changes in bacterial morphology (Fig. 3F).

244

#### 245 **TAT-RasGAP<sub>317-326</sub> alters the transcriptional landscape of *E. coli***

246 It has been previously shown that AMPs can have more than one target and may also  
247 indirectly impact a number of cellular processes [29]. To assess the overall effect of TAT-  
248 RasGAP<sub>317-326</sub> on the *E. coli* transcriptome, we performed RNA-Seq analysis and compared  
249 the transcriptional profile of bacteria exposed to the TAT-RasGAP<sub>317-326</sub> peptide and of  
250 untreated bacteria. For these experiments, we chose a concentration of peptide (10  $\mu$ M) that  
251 inhibits growth but is not bactericidal (Fig. 3A). Among the 4419 transcripts predicted from the  
252 *E. coli* MG1655 genome, 95.6% (n = 4223) were detected for at least one of the conditions.  
253 Figure 4A and Dataset1 present data for the fold change in gene expression between bacteria  
254 incubated in the presence or absence of TAT-RasGAP<sub>317-326</sub> peptide as well as the average  
255 level of expression for each gene. We excluded from our analysis genes whose expression  
256 was below the threshold set at 16 reads per kilobase of transcripts per million reads (RPKM).  
257 Overall, TAT-RasGAP<sub>317-326</sub> treatment notably affected the expression of 962 genes (fold  
258 change > 4), 11.0% of these were upregulated (red dots in Fig. 4A, Table S2) while 11.8%  
259 were downregulated (blue dots in Fig. 4A, Table S3).

260 We assessed and validated twelve genes from the RNA-Seq data by qRT-PCR on RNA  
261 extracted under the same conditions as for the RNA-Seq analysis. Five of these were reported  
262 as upregulated, five as downregulated and two as unchanged according to the RNA-seq  
263 analysis. One of the unchanged genes, *ompR*, was used as the housekeeping reference gene  
264 for normalization. We obtained good correlation between the fold changes obtained with RNA-  
265 Seq and with qRT-PCR (Fig. 4B).

266 To determine which biological processes or pathways were over-represented among  
267 differentially expressed genes, we performed KEGG pathway [30-32] and GO term analyses  
268 [33, 34]. The analysis of KEGG pathways revealed that several metabolic and information-

269 processing pathways were enriched among differentially expressed genes (Fig. 4C-D). For  
270 example, seven of the eight genes responsible for enterobactin synthesis in *E. coli* (included  
271 in “biosynthesis of siderophore group nonribosomal peptides” KEGG pathway) were  
272 upregulated upon peptide treatment. Other metabolic pathways such as carbon metabolism  
273 (citrate cycle, pyruvate metabolism) and oxidative phosphorylation were downregulated. GO  
274 term analysis also highlights the metabolic changes induced by TAT-RasGAP<sub>317-326</sub> (Fig. S5).  
275 Functions related to stress response were activated, causing strong modifications of the  
276 transcription profiles of transporters and regulatory pathways.

277

### 278 **Screening of the Keio *E. coli* deletion mutant library uncovers genes that regulate** 279 **bacterial resistance to TAT-RasGAP<sub>317-326</sub> peptide**

280 Since our results suggest that TAT-RasGAP<sub>317-326</sub> has a different MOA compared to  
281 described AMPs, we screened the Keio collection of *E. coli* deletion mutants [35] for genes  
282 whose deletion influences resistance to TAT-RasGAP<sub>317-326</sub>. Each strain of the Keio collection  
283 was grown in presence of 5  $\mu$ M TAT-RasGAP<sub>317-326</sub>. This concentration of peptide does not  
284 kill wild-type *E. coli* over the course of 24 hours following peptide addition (Fig. 3A). OD<sub>590</sub> was  
285 measured 1.5, 3, 6 and 24 hours after addition of TAT-RasGAP<sub>317-326</sub> (Dataset 2). We  
286 calculated the distribution of the fold change growth upon incubation with TAT-RasGAP<sub>317-326</sub>  
287 versus without peptide for each strain at 6h and 24h (Fig. 5A-B). Resistant strains were defined  
288 as growing more than the wild-type average plus two times the standard deviation at 6 hours  
289 (Fig. 5A). Hypersensitive strains were defined as growing less than the wild-type average  
290 minus three times the standard deviation 24 hours after addition of the peptide (Fig 5B). Using  
291 these thresholds, we selected 27 resistant (Table S4) and 356 hypersensitive strains (Table  
292 S5). While the wild-type strains grew slower in the presence than in the absence of TAT-  
293 RasGAP<sub>317-326</sub>, resistant strains grew similarly in both conditions and hypersensitive strains  
294 showed no growth in the presence of the peptide (Fig. 5C). Results of this screening indicate  
295 that deletions of genes involved in carbon metabolism, citrate cycle, oxidative phosphorylation  
296 (carbon metabolism, citrate cycle, oxidative phosphorylation) sensitized bacteria to TAT-

297 RasGAP<sub>317-326</sub> peptide (Fig. 5D-E). We also found that some two-component systems and  
298 transcriptional regulators are required to maintain a normal rate of resistance to the peptide  
299 (Fig. 5D-E). Analysis of resistant mutants showed that they carry deletions in genes involved  
300 in LPS biogenesis and oxidative phosphorylation (Table S4). Interestingly, deletion of *febP*,  
301 involved in enterobactin import, caused an increase in resistance towards TAT-RasGAP<sub>317-326</sub>  
302 further indicating that iron uptake may play an important role in the activity of this peptide.

303

### 304 **Transposon screening in *P. aeruginosa***

305 Since TAT-RasGAP<sub>317-326</sub> is active against both *E. coli* and *P. aeruginosa*, we wanted to  
306 investigate whether some of the pathways that play a role in resistance to the peptide are  
307 shared between the two bacterial species. To do this analysis, we exposed a *P. aeruginosa*  
308 transposon library to TAT-RasGAP<sub>317-326</sub> and identified mutants that showed hypersensitivity  
309 to the peptide [36]. We grew this library in presence or absence of 0.5  $\mu$ M TAT-RasGAP<sub>317-326</sub>  
310 for 12 generations and performed deep sequencing in order to detect mutants, which could  
311 not proliferate compared to others (Dataset 3). We interpreted lack of proliferation of these  
312 mutants as a read-out of hypersensitivity to TAT-RasGAP<sub>317-326</sub>. We identified 75 genes,  
313 whose disruption via transposon insertion caused increased sensitivity to the peptide (Table  
314 S6). Interestingly, 26 of these (35%) are associated with hypersensitivity to other antimicrobial  
315 peptides [36]. Some of these genes code for LPS modifying enzymes such as *arnA*, *arnB* and  
316 *arnT*, and for two-component regulators such as *parS* and *parR* that are involved in the  
317 regulation of LPS modification. Among the genes, in which transposon insertion caused  
318 hypersensitivity towards TAT-RasGAP<sub>317-326</sub> and not towards other AMPs, we identified *algJ*,  
319 *algK* and *algX*, genes of the biosynthesis pathway of the extracellular polysaccharide alginate.  
320 We also observed that mutants in genes coding for the RND efflux transporter MdtABC and  
321 CusC, a component of the trans-periplasmic Cu<sup>+</sup> transporter CusCFBA, appear to be  
322 hypersensitive to TAT-RasGAP<sub>317-326</sub>. Other pathways that seem to be important for TAT-  
323 RasGAP<sub>317-326</sub> resistance are related to carbon metabolism, redox reactions and translation  
324 regulation (Table S6).

325 We next compared the lists of hypersensitive strains found in screenings in *E. coli* and in  
326 *P. aeruginosa*. We identified 15 gene orthologues, whose disruption causes hypersensitivity  
327 to the TAT-RasGAP<sub>317-326</sub> peptide in both *E. coli* and *P. aeruginosa* (Table 2). Among them,  
328 five are coding for two-component system proteins: *parR* and *parS* (*rtsA* and *rstB* in *E. coli*),  
329 *phoP*, *pmrB* (*qseC* in *E. coli*) and *colR* (*cusR* in *E. coli*). These five mutants display  
330 hypersensitivity to polymyxin B in *P. aeruginosa* [36], indicating that adaptability through these  
331 regulatory pathways is required to respond to AMPs. We also found genes conserved between  
332 *P. aeruginosa* and *E. coli* that respond specifically to treatment with TAT-RasGAP<sub>317-326</sub> and  
333 are involved in diverse cellular processes such as transcriptional regulation, DNA repair,  
334 glyoxylate detoxification, redox reactions, transmembrane transport and LPS biosynthesis  
335 (Table 2).

336

337 **Combining TAT-RasGAP<sub>317-326</sub> peptide and other AMPs does not produce additive**  
338 **effects.**

339 In order to determine whether TAT-RasGAP<sub>317-326</sub> activity is additive with the action of  
340 other AMPs, we performed growth tests of *E. coli* in presence of different combinations of  
341 TAT-RasGAP<sub>317-326</sub>, melittin, LL-37 and polymyxin B, using sub-inhibitory concentrations of  
342 each peptide (Fig. 6A). Sub-inhibitory concentrations were chosen so that addition of two times  
343 this concentration would cause a visible drop in bacterial proliferation (Fig. 6A vs 6B). The  
344 additive effect of these AMPs was then tested by measuring the growth of *E. coli* in presence  
345 of combinations of any two AMPs (Fig. S6). To assess additivity, we calculated percent growth  
346 after 6 h of treatment compared to untreated control (Fig. 6C). We did not observe additive  
347 effect for TAT-RasGAP<sub>317-326</sub> with the three other AMPs tested. However, there is an additive  
348 effect of the combination of melittin and polymyxin B (2.8% of growth), and the combination of  
349 LL-37 and polymyxin B (0.8% of growth). Notably, the combination of melittin and polymyxin  
350 B caused stronger growth inhibition (2.8%) than incubation with the individual double doses  
351 (77.3% for melittin and 63.8% for polymyxin B, Fig. 6C). This effect is reminiscent of the  
352 synergism previously reported between melittin and antibiotics such as doripenem and

353 ceftazidime [37]. In contrast, the combination of melittin and TAT-RasGAP<sub>317-326</sub> showed an  
354 antagonist effect, since sub-inhibitory concentration of melittin blocked the growth inhibition  
355 caused by the TAT-RasGAP<sub>317-326</sub> peptide (Fig. 6D). To better understand the cause of this  
356 antagonistic effect, we performed FACS analysis using FITC-labelled TAT-RasGAP<sub>317-326</sub>. We  
357 found that, in presence of melittin, binding of FITC-labelled TAT-RasGAP<sub>317-326</sub> to *E. coli*  
358 bacteria was not affected and is comparable to the control condition where bacteria were  
359 incubated with FITC-labelled TAT-RasGAP<sub>317-326</sub> alone (Fig. 6E). However, entry of the  
360 labelled version of TAT-RasGAP<sub>317-326</sub> peptide was inhibited in presence of melittin (Fig. 6F).

361

### 362 **Appearance of TAT-RasGAP<sub>317-326</sub> peptide-resistant strains**

363 One argument for the introduction of AMPs in the clinic as an antibiotic alternative is the  
364 low rate of peptide resistance and the fact that low rate of cross-resistance to other AMPs or  
365 antibiotics has been detected so far [9, 10, 38]. To address this topic, we tested the kinetics  
366 of resistance towards TAT-RasGAP<sub>317-326</sub> peptide in several bacterial strains (*E. coli*, *P.*  
367 *aeruginosa*, *S. aureus* and *S. capitis*). First, we grew our parent bacterial strains overnight in  
368 presence of sub-inhibitory concentrations of the peptide. We then diluted this parent culture  
369 into two subcultures, one of which was exposed to an increased concentration of the TAT-  
370 RasGAP<sub>317-326</sub> peptide while the other was kept in the same concentration of peptide as the  
371 parent culture. Once bacterial growth was detected in the culture exposed to an elevated  
372 concentration of the peptide, the process was repeated thereby exposing the bacterial culture  
373 to sequentially increasing concentrations of peptide for a total of 20 passages. For each  
374 passage, we measured the corresponding MIC (Fig. 7). Using this approach, we obtained  
375 strains with increased MICs for *E. coli*, *S. capitis* and *S. aureus*, but not *P. aeruginosa* (Fig. 7,  
376 Table 3 and Tables S7-10). It should be noted that the parental strain of *S. aureus* has a  
377 peptide MIC in the range 64-128  $\mu$ M and this MIC rapidly increased to 256  $\mu$ M (Table S10).  
378 We did not expose bacteria to higher MIC values, as any higher concentration of peptide is  
379 not soluble in culture medium. To test whether the strains recovered at passage 20 for *E. coli*  
380 and passage 12 for *S. aureus* showed increased resistance to other AMPs as well, we

381 determined the fold change of the MICs for polymyxin B, melittin and LL-37 relative to the  
382 corresponding parental strains that did not undergo selection (Table 3). Interestingly, the  
383 resistant *E. coli* strain did not show increased MICs to the other AMPs we tested as compared  
384 to the parental strain. In contrast, *P. aeruginosa* selected for resistance to TAT-RasGAP<sub>317-326</sub>  
385 showed increased MIC towards other AMPs. Similar to *P. aeruginosa*, the *S. aureus* and *S.*  
386 *capitis* strains selected for resistance to TAT-RasGAP<sub>317-326</sub> exhibited increased MICs towards  
387 other AMPs (Table 3).

388

## 389 Discussion

390 AMPs are promising alternatives to classical antibiotics. One such alternative that our lab  
391 studies is the antimicrobial peptide TAT-RasGAP<sub>317-326</sub>. While we have recently reported the  
392 antimicrobial activity of TAT-RasGAP<sub>317-326</sub> against both Gram-positive and Gram-negative  
393 bacterial strains [11], we lack a comprehensive understanding of the mechanisms behind the  
394 mode of action of this peptide.

395 Here, we investigated the effects of salt concentration and pH levels on TAT-RasGAP<sub>317-</sub>  
396 <sub>326</sub> activity. We also studied the interplay between TAT-RasGAP<sub>317-326</sub> and other AMPs, and  
397 assessed the rate of emergence of TAT-RasGAP<sub>317-326</sub> resistance in various bacterial strains.  
398 We showed that TAT-RasGAP<sub>317-326</sub> activity depends on medium composition – specifically,  
399 salt concentration and pH levels. The divalent cations Mg<sup>2+</sup> and Ca<sup>2+</sup> lowered the activity of  
400 TAT-RasGAP<sub>317-326</sub>, an effect that was even more pronounced with Fe<sup>2+</sup>. We also determined  
401 that low pH affects peptide activity. Both pH levels and iron reduced the affinity of the peptide  
402 to bind to bacteria. This could be the result of iron binding to a putative target of TAT-  
403 RasGAP<sub>317-326</sub> on the bacterial surface, thereby blocking peptide accessibility to the bacterial  
404 surface. Low pH levels could be affecting overall charge of the bacterial cell envelope or  
405 modify the conformation or levels of putative peptide binding partners located on the bacterial  
406 surface, thus decreasing peptide binding to bacteria. In contrast to iron and low pH levels,  
407 magnesium and calcium did not block peptide binding and entry. However, peptide was less  
408 efficient at killing *E. coli* grown in LB medium supplemented with magnesium and calcium.



409 Potentially, these cations might induce a physiological response of the bacteria that increases  
410 resistance to the TAT-RasGAP<sub>317-326</sub> peptide.

411 To investigate the bacterial response to TAT-RasGAP<sub>317-326</sub>, we performed RNA-Seq  
412 analysis of *E. coli* exposed to TAT-RasGAP<sub>317-326</sub>. We measured a profound effect of the  
413 peptide on transcriptional regulation in bacteria exposed to peptide: 22.8 % of detected genes  
414 were differentially transcribed after peptide exposure. Stress response, metabolism,  
415 translation machinery as well as membrane transporters were strongly modulated. Notably,  
416 we also observed that genes involved in iron transport are strongly upregulated in the  
417 presence of the peptide.

418 In an attempt to further characterize the MOA of TAT-RasGAP<sub>317-326</sub>, we screened the *E.*  
419 *coli* Keio deletion mutant collection as well as a *P. aeruginosa* transposon mutant library.  
420 These screening experiments revealed the importance of two-component systems and carbon  
421 metabolism in bacterial response to TAT-RasGAP<sub>317-326</sub> peptide. Notably, we detected peptide  
422 resistance in bacterial Keio strains deleted for genes involved in LPS biosynthesis, suggesting  
423 that interaction between LPS and TAT-RasGAP<sub>317-326</sub> peptide might be required for its  
424 antimicrobial activity. Moreover, mutations in genes coding for alginate biosynthesis in *P.*  
425 *aeruginosa* caused hypersensitivity towards TAT-RasGAP<sub>317-326</sub>. Bacterial surface  
426 composition may thus be an important parameter for activity of TAT-RasGAP<sub>317-326</sub>. It should  
427 be noted that deletion of *entB*, a gene coding for an enterobactin transporter, causes partial  
428 resistance towards the peptide in *E. coli*. This result, together with the protective effect of Fe<sup>2+</sup>,  
429 highlights a possible role of iron receptors or transporters in the antimicrobial activity of TAT-  
430 RasGAP<sub>317-326</sub>. Further work will be required to determine whether the iron transport system is  
431 involved in peptide translocation.

432 We observed that TAT-RasGAP<sub>317-326</sub> has no additivity with pore-forming AMPs. This is  
433 compatible with the hypothesis that TAT-RasGAP<sub>317-326</sub> does not have a pore-forming MOA.  
434 Moreover, this indicates that combinations of TAT-RasGAP<sub>317-326</sub> with other AMPs do not  
435 increase the activity of TAT-RasGAP<sub>317-326</sub>. In contrast, we observed that melittin had a  
436 protective activity against TAT-RasGAP<sub>317-326</sub>. We showed that melittin blocks the entry of

437 TAT-RasGAP<sub>317-326</sub>, possibly by binding the bacterial membrane and not allowing TAT-  
438 RasGAP<sub>317-326</sub> to translocate. Our results indicate that interactions between the AMPs tested  
439 here are diverse and range from synergism (polymyxin B and melittin for example) to  
440 antagonism (TAT-RasGAP<sub>317-326</sub> and melittin) and no effect (TAT-RasGAP<sub>317-326</sub> and  
441 polymyxin B, for example).

442 Prior to clinical application of an antimicrobial peptide, it is important to determine the rate  
443 at which resistance against this peptide might arise in bacteria. To investigate this question,  
444 we performed selection of TAT-RasGAP<sub>317-326</sub>-resistant mutants in *E. coli*, *S. capitis* and *S.*  
445 *aureus*. *P. aeruginosa* resistant strains were selected in medium containing a concentration  
446 of TAT-RasGAP<sub>317-326</sub> corresponding to 10 times the MIC. However, when we subsequently  
447 tested these strains to determine MIC, we found they possessed only 2- to 4- fold increase in  
448 MICs. We hypothesize that this discrepancy might be due to transient adaptations of *P.*  
449 *aeruginosa* to TAT-RasGAP<sub>317-326</sub> during the resistance selection screen, which resulted in  
450 higher apparent MIC. Taken together, these results indicate that resistance to TAT-  
451 RasGAP<sub>317-326</sub> can appear to different extents in diverse bacteria. An *E. coli* strain that showed  
452 resistance to TAT-RasGAP<sub>317-326</sub> was not resistant to other AMPs (Table 3). This was different  
453 for resistant strains of *S. aureus* and *S. capitis*, which showed increased resistance to other  
454 AMPs. This indicates that different mechanisms of resistance may be at play in different  
455 bacterial species.

456 Overall, in this paper, we show the role of extracellular factors influencing the antimicrobial  
457 activity of TAT-RasGAP<sub>317-326</sub>, characterize the transcriptional response of bacteria to TAT-  
458 RasGAP<sub>317-326</sub>, outline the interplay between TAT-RasGAP<sub>317-326</sub> and other AMPs, and raise  
459 awareness for emergence of peptide resistance in bacteria. Taken together, our findings will  
460 contribute to a better understanding of the mechanisms underlying TAT-RasGAP<sub>317-326</sub> activity  
461 and may provide future directions to improve the efficacy of this peptide *in vivo*.

462

463

## 464 **Material and methods**

### 465 **Strains and growth conditions**

466 *E. coli* strains K-12 MG1655 substrain or BW25113 were grown in LB or Basal Medium 2  
467 (BM2; 62 mM potassium phosphate buffer [pH 7.0], 7 mM (NH<sub>4</sub>)<sub>2</sub>SO<sub>4</sub>, 10 μM FeSO<sub>4</sub>, 0.4%  
468 (wt/v) glucose and 0.5% tryptone) with high (2mM) or low (20 μM) concentration of Magnesium  
469 (MgSO<sub>4</sub>) [39]. *Pseudomonas aeruginosa* strain PA14 was grown either in LB or BM2 medium.  
470 *Staphylococcus capitis* [11] and *S. aureus* (ATCC 29213) strains were grown in tryptic soy  
471 broth (TSB) [40]. All strains were stored at -80°C, in their respective medium, supplemented  
472 with ~25% glycerol. When required, antibiotics were added at final concentrations of 50 μg/mL  
473 (kanamycin), 20 μg/mL (gentamycin), or 100 μg/mL (carbenicillin). When indicated, LB was  
474 buffered with 100 mM of the buffering agent 2-(N-morpholino)ethanesulfonic acid (MES,  
475 Sigma-Aldrich, Saint-Louis, MO) and pH was adjusted with HCl [25]. 100 mM sorbitol (Sigma-  
476 Aldrich) was added to LB as an osmoprotectant when indicated. The retro-inverse TAT-  
477 RasGAP<sub>317-326</sub> peptide (amino acid sequence DTRLNTVWMWGRRRQRRKRG) and the N-  
478 terminal FITC-labelled version of this peptide were synthesized by SBS Genetech (Beijing,  
479 China) and stored at -20°C. Chemicals were purchased from Sigma-Aldrich, unless otherwise  
480 specified.

481

### 482 **MIC measurements**

483 The minimum inhibitory concentration (MIC) of peptide was defined as the lowest  
484 concentration of peptide that resulted in no visible growth. Overnight cultures were diluted to  
485 OD<sub>600</sub> = 0.1 and grown with shaking at 37°C for one hour. MICs were measured by diluting  
486 these cultures (1:20 for LB and TSB cultures and 1:8 for BM2 cultures) and then adding 2-fold  
487 dilutions of the peptide (starting with 256 μM) in 96-well plates. Volume of media (with peptide)  
488 per well was 100 μl and 10 μl of diluted cultures were added to each well. Cell growth was  
489 monitored via OD<sub>600</sub> measurement after overnight growth with shaking at 37°C. OD<sub>600</sub> readings  
490 were measured by FLUOstar Omega microplate reader (BMG Labtech, Ortenberg, Germany).

491 Peptide-free growth control wells and bacteria-free contamination control wells were included.

492 First concentration at which no bacterial growth could be detected was defined as the MIC.

493

#### 494 **CFU measurements**

495 Overnight cultures were diluted to  $OD_{600} = 0.1$  and grown with shaking at  $37^{\circ}\text{C}$  for one  
496 hour. MICs were measured by adding indicated concentrations of peptide or antibiotics to the  
497 culture tube (1 ml culture volume). Cell growth was monitored via  $OD_{600}$  measurement by  
498 Novaspec II Visible spectrophotometer (Pharmacia LKB Biotechnology, Cambridge, England)  
499 and colony forming units (CFU) assay. Each time point (two, four and six hours) was taken by  
500 removing 10  $\mu\text{l}$  and performing 10-fold serial dilutions. Four dilutions of each condition were  
501 then plated in the absence of peptide and grown at  $37^{\circ}\text{C}$  overnight. CFU were measured by  
502 counting the resulting number of colonies the next day.

503

#### 504 **Confocal microscopy**

505 Overnight cultures of *E. coli* MG1655 were diluted to  $OD_{600} = 0.1$ , incubated or not for one  
506 hour with 10  $\mu\text{M}$  FITC-labelled TAT-RasGAP<sub>317-326</sub>, stained with 5  $\mu\text{g/ml}$  FM4-64 and fixed with  
507 4% paraformaldehyde solution. Incubation with DAPI was subsequently performed and  
508 pictures were acquired on a LSM710 confocal microscope (Zeiss, Oberkochen, Germany).  
509 Images were analyzed with ImageJ software [41].

510

#### 511 **Electron microscopy**

512 Bacteria were fixed with 2.5% glutaraldehyde solution (EMS, Hatfield, PA) in Phosphate  
513 Buffer (PB 0.1 M pH 7.4) for 1 hour at room temperature. Then, bacterial samples were fixed  
514 by incubating in a freshly prepared mix of 1% osmium tetroxide (EMS) and 1.5% potassium  
515 ferrocyanide in phosphate buffer for 1 hour at room temperature. The samples were then  
516 washed three times in distilled water and spun down in 2% low melting agarose, solidified on  
517 ice, cut into  $1\text{mm}^3$  cubes and dehydrated in acetone solution at graded concentrations (30%-

518 40min; 50%-40min; 70%-40min; 100%-3x1h). This was followed by infiltration in Epon at  
519 graded concentrations (Epon 1/3 acetone-2h; Epon 3/1 acetone-2h, Epon 1/1-4h; Epon 1/1-  
520 12h) and finally polymerization for 48h at 60°C in a laboratory oven. Ultrathin sections of 50  
521 nm were cut on a Leica Ultramicrotome (Leica Mikrosysteme GmbH, Vienna, Austria) and  
522 placed on a copper slot grid 2x1mm (EMS) coated with a polystyrene film. The bacterial  
523 sections were stained in 4% uranyl acetate for 10 minutes, rinsed several times with water,  
524 then incubated in Reynolds lead citrate and finally rinsed several times with water before  
525 imaging.

526 Micrographs (10x10 tiles) with a pixel size of 1.209 nm over an area of 40x40 µm were  
527 taken with a transmission electron microscope Philips CM100 (Thermo Fisher Scientific,  
528 Waltham, MA) at an acceleration voltage of 80kV with a TVIPS TemCam-F416 digital camera  
529 (TVIPS GmbH, Gauting, Germany). Large montage alignments were performed using  
530 Blendmont command-line program from the IMOD software [42] and treated with ImageJ  
531 software.

532

### 533 **Flow cytometry**

534 Overnight cultures of *E. coli* MG1655 were diluted 1:100 and grown to mid exponential  
535 phase ( $OD_{600} = 0.4-0.6$ ) with shaking at 37°C. Each culture was then diluted to  $OD_{600} = 0.1$ ,  
536 grown with shaking at 37°C for one hour and then treated with 10 µM FITC-labelled peptide  
537 for 1 hour. Following peptide treatment, bacterial cells were washed in 1X PBS and diluted 1:5  
538 before acquisition on a CytoFLEX benchtop flow cytometer (Beckman Coulter). For each  
539 sample, 10,000 events were collected and analysed. Extracellular fluorescence was quenched  
540 by adding 200 µL of Trypan Blue (0.4%).

541

### 542 **RNA-Seq**

543 Overnight cultures of *E. coli* MG1655 were diluted to  $OD_{600} = 0.1$  and grown with shaking  
544 at 37°C for one hour to mid exponential phase ( $OD_{600} = 0.4-0.6$ ). Cultures were then treated  
545 with TAT-RasGAP<sub>317-326</sub> (10µM) or left untreated (negative control), and grown with shaking at

546 37°C for an additional hour. For RNA extraction, protocol 1 in the RNAprotect Bacteria  
547 Reagent Handbook (Enzymatic lysis of bacteria) was followed using the RNeasy Plus Mini Kit  
548 (Qiagen) plus home-prepared TE buffer (10 mM Tris-HCl, 1 mM EDTA, pH 8.0) containing 1  
549 mg/mL lysozyme (AppliChem, Chicago, IL). In the last step, RNA was eluted in 30 µL RNase-  
550 free water. Next, any contaminating DNA was removed using the DNA-free™ DNA Removal  
551 Kit (Invitrogen, Carlsbad, CA). 10x DNase buffer was added to the 30 µL eluted RNA with 2  
552 µL rDNase I. This mix was incubated for 30 min at 37°C followed by rDNase I inactivation with  
553 7 µL DNase Inactivation Reagent for 2 min with shaking (700 rpm) at room temperature.  
554 Samples were then centrifuged for 90 seconds at 10,000 x *g*, supernatant was transferred to  
555 a new tube, and stored at -80°C. Integrity of the samples was verified using the Standard  
556 Sensitivity RNA Analysis kit (Advanced Analytical, Ankeny, IA) with the Fragment Analyser  
557 Automated CE System (Labgene Scientific, Châtel-Saint-Denis, Switzerland). Samples that  
558 met RNA-Seq requirements were further processed and sent for sequencing. Preparation of  
559 the libraries and Illumina HiSeq platform (1x50 bp) sequencing were performed by FASTERIS  
560 (Plan-les-Ouates, Switzerland). Raw reads were trimmed with trimmomatic version 0.36 [43]  
561 (parameters: ILLUMINACLIP: NexteraPE-PE.fa:3:25:6, LEADING: 28, TRAILING: 28  
562 MINLEN: 30). Trimmed reads were mapped to the genome of *E. coli* K-12 MG1655  
563 (accession: NC\_000913.3) with bwa mem version 0.7.17 (<https://arxiv.org/abs/1303.3997>) using  
564 default parameters. Htseq version 0.11.2 [44] was used to count reads aligned to each gene  
565 (parameters: --stranded=no -t gene). Normalized expression values were calculated as Reads  
566 Per Kilobase of transcript per Million mapped reads (RPKM) with edgeR [45].

567

### 568 **Keio collection screening**

569 Deletion mutants from the Keio collection [35, 46] were used. Overnight cultures were  
570 diluted 1:100 in LB medium. Bacteria were incubated at 37°C with shaking for 1h before adding  
571 TAT-RasGAP<sub>317-326</sub> (5 µM final concentration). Plates were incubated statically at 37°C and  
572 OD<sub>590</sub> was measured at 0h, 1.5h, 3h, 6h and 24h with FLUOstar Omega plate reader (BMG

573 Labtech, Ortenberg, Germany). Measurements were combined and analysed with R (version  
574 3.6.1, [47]). Data analysis and visualisation were performed respectively with the *dplyr* (version  
575 0.8.5) and *ggplot2* (version 3.3.0) packages from the *tidyverse* (version 1.3.0) environment.  
576 Since starting OD<sub>590</sub> varied between strains, the corresponding starting value (T0  
577 measurement) was subtracted at each measurement. Then, for each strain, the growth with  
578 TAT-RasGAP<sub>317-326</sub> was divided by the growth without peptide for normalization. The threshold  
579 for resistance was set based on normalized growth at 6h (NG6h) as ‘NG6h strain’ > ‘NG6h  
580 WT + 2 x SD(NG6h WT)’. Hypersensitive strains were selected based on NG at 24h (NG24h)  
581 as ‘NG24h strain’ < ‘NG24h WT – 3 x SD (NG24h WT)’.

582 Gene ontology (GO) annotation [34] was obtained from GO database (2020-09-01,  
583 “<http://current.geneontology.org/annotations>”) and assigned to the list of gene deletion  
584 inducing hypersensitivity with the GO.db package (version 3.10.0 [48]). GO IDs were assigned  
585 to each gene and the corresponding GO names were obtained with the “Term” function.  
586 Additionally, the same set of genes was subjected to KEGG pathways analysis [30] with the  
587 KEGGREST package (version 1.26.1). Briefly, the KEGG orthology (KO) and KEGG pathway  
588 annotation were obtained from the KEGG database [32] for *E. coli* K-12 MG1655 (eco). The  
589 code is available on Github ([https://github.com/njacquie/TAT-RasGAP\\_project](https://github.com/njacquie/TAT-RasGAP_project)).

590

### 591 ***Pseudomonas aeruginosa* PA14 transposon library screening**

592 The library of transposon (Tn) mutants in *P. aeruginosa* PA14 [36] was grown in BM2  
593 supplemented with 20 µM MgSO<sub>4</sub> [39] and 0.2 % L-rhamnose monohydrate (Sigma-Aldrich,  
594 Ref. 83650) in the absence or presence of 0.5 µM TAT-RasGAP<sub>317-326</sub>. Following growth for  
595 12 generations, genomic DNA (gDNA) was extracted with the GenElute Bacterial Genomic  
596 DNA Kit (Sigma-Aldrich, Cat. No. NA2100-1KT). The transposon sequencing (Tn-seq) circle  
597 method [49, 50] was employed to sequence the transposon junctions. Briefly, the gDNA was  
598 sheared to an average size of 300 bp fragments with a focused-ultrasonicator. The DNA  
599 fragments were repaired and ligated to adapters with the NEBNext Ultra II DNA Library Prep  
600 Kit for Illumina (New England Biolabs). Following restriction of the Tn with BamHI (New



601 England Biolabs), the fragments were circularized by ligation and exonuclease treatment was  
602 applied to remove undesired non-circularized DNAs [49]. The Tn junctions were PCR amplified  
603 and amplicons were sequenced with the MiSeq Reagent Kit v2, 300-cycles (Illumina).

604 Following sequencing, the adapter sequences of the reads (.fastq) were trimmed with the  
605 command line “cutadapt -a adapter -q quality -o output.fastq.gz input.fastq.gz” [51]. The  
606 software Tn-Seq Explorer [52] mapped the trimmed and paired reads onto the *P. aeruginosa*  
607 UCBPP-PA14 genome [53], and determined the unique insertion density (UID, i.e. the number  
608 of unique Tn insertions divided per the length of the gene). The normalized UID between the  
609 treated and non-treated samples were compared and this ratio (log<sub>2</sub>-fold change, FC) was  
610 used to identify resistant determinants (log<sub>2</sub>-FC < - 1.0 and normalized UID > 0.0045).

611

#### 612 **Selection of resistant mutants**

613 Bacteria were grown in the corresponding medium, diluted 1:100 and cultured overnight  
614 with 0.5x MIC of TAT-RasGAP<sub>317-326</sub>. The subculture was diluted 1:100 and incubated with  
615 0.5x or 1x MIC overnight. Cells that successfully grew were diluted 1:100 in medium containing  
616 the same concentration or twice the concentration of peptide. Each dilution in fresh medium  
617 containing peptide is considered one passage. This process was repeated for up to 20  
618 passages.

619

620

## 621 **Authorship**

622 MG, TH, NJ, AV, SH and SC performed experiments. MG, TH, LE, CW and NJ were involved  
623 in the planning of the project and discussed the results. MG, TH, NJ and TP analysed the  
624 results. MG and NJ wrote the manuscript. All the authors proofread the manuscript.

625

## 626 **Acknowledgments**

627 We would like to thank Sébastien Aeby for technical support, Valentin Scherz for support in  
628 bioinformatics analyses and Prof. Gilbert Greub for sharing equipment and laboratories. This  
629 study was supported by an interdisciplinary grant of the Faculty of Biology and Medicine of the  
630 University of Lausanne.

631

## 632 **Conflicts of interest**

633 The authors declare no conflicts of interest.

634

635

## 636 References

- 637 1. O'Neill, J., *Tackling Drug-resistant Infections Globally: Final Report and Recommendations of*  
638 *the Review on Antimicrobial Resistance*, H. Government, Editor. 2016: London.
- 639 2. Kumar, P., J.N. Kizhakkedathu, and S.K. Straus, *Antimicrobial Peptides: Diversity, Mechanism*  
640 *of Action and Strategies to Improve the Activity and Biocompatibility In Vivo*. Biomolecules,  
641 2018. **8**(1).
- 642 3. Hassan, M., et al., *Natural antimicrobial peptides from bacteria: characteristics and potential*  
643 *applications to fight against antibiotic resistance*. J Appl Microbiol, 2012. **113**(4): p. 723-36.
- 644 4. Xhindoli, D., et al., *The human cathelicidin LL-37--A pore-forming antibacterial peptide and*  
645 *host-cell modulator*. Biochim Biophys Acta, 2016. **1858**(3): p. 546-66.
- 646 5. Wang, G., X. Li, and Z. Wang, *APD3: the antimicrobial peptide database as a tool for research*  
647 *and education*. Nucleic Acids Res, 2016. **44**(D1): p. D1087-93.
- 648 6. Hong, J., et al., *How Melittin Inserts into Cell Membrane: Conformational Changes, Inter-*  
649 *Peptide Cooperation, and Disturbance on the Membrane*. Molecules, 2019. **24**(9).
- 650 7. Mendez-Samperio, P., *The human cathelicidin hCAP18/LL-37: a multifunctional peptide*  
651 *involved in mycobacterial infections*. Peptides, 2010. **31**(9): p. 1791-8.
- 652 8. Srinivas, P. and K. Rivard, *Polymyxin Resistance in Gram-negative Pathogens*. Curr Infect Dis  
653 Rep, 2017. **19**(11): p. 38.
- 654 9. Spohn, R., et al., *Integrated evolutionary analysis reveals antimicrobial peptides with limited*  
655 *resistance*. Nat Commun, 2019. **10**(1): p. 4538.
- 656 10. Lazzaro, B.P., M. Zasloff, and J. Rolff, *Antimicrobial peptides: Application informed by*  
657 *evolution*. Science, 2020. **368**(6490).
- 658 11. Heulot, M., et al., *The Anticancer Peptide TAT-RasGAP317-326 Exerts Broad Antimicrobial*  
659 *Activity*. Front Microbiol, 2017. **8**: p. 994.
- 660 12. Michod, D. and C. Widmann, *TAT-RasGAP317-326 requires p53 and PUMA to sensitize tumor*  
661 *cells to genotoxins*. Mol Cancer Res, 2007. **5**(5): p. 497-507.
- 662 13. Pittet, O., et al., *Effect of the TAT-RasGAP(317-326) peptide on apoptosis of human malignant*  
663 *mesothelioma cells and fibroblasts exposed to meso-tetra-hydroxyphenyl-chlorin and light*. J  
664 Photochem Photobiol B, 2007. **88**(1): p. 29-35.
- 665 14. Annibaldi, A., et al., *TAT-RasGAP317-326-mediated tumor cell death sensitization can occur*  
666 *independently of Bax and Bak*. Apoptosis, 2014. **19**(4): p. 719-33.
- 667 15. Chevalier, N., N. Gross, and C. Widmann, *Assessment of the chemosensitizing activity of TAT-*  
668 *RasGAP317-326 in childhood cancers*. PLoS One, 2015. **10**(3): p. e0120487.
- 669 16. Heulot, M., et al., *The TAT-RasGAP317-326 anti-cancer peptide can kill in a caspase-,*  
670 *apoptosis-, and necroptosis-independent manner*. Oncotarget, 2016. **7**(39): p. 64342-64359.
- 671 17. Barras, D., et al., *A WXW motif is required for the anticancer activity of the TAT-RasGAP317-*  
672 *326 peptide*. J Biol Chem, 2014. **289**(34): p. 23701-11.
- 673 18. Walkenhorst, W.F., *Using adjuvants and environmental factors to modulate the activity of*  
674 *antimicrobial peptides*. Biochim Biophys Acta, 2016. **1858**(5): p. 926-35.
- 675 19. Fernandez, L., et al., *Characterization of the polymyxin B resistome of Pseudomonas*  
676 *aeruginosa*. Antimicrob Agents Chemother, 2013. **57**(1): p. 110-9.
- 677 20. Macfarlane, E.L., et al., *PhoP-PhoQ homologues in Pseudomonas aeruginosa regulate*  
678 *expression of the outer-membrane protein OprH and polymyxin B resistance*. Mol Microbiol,  
679 1999. **34**(2): p. 305-16.
- 680 21. Sahlin, S., J. Hed, and I. Rundquist, *Differentiation between attached and ingested immune*  
681 *complexes by a fluorescence quenching cytofluorometric assay*. J Immunol Methods, 1983.  
682 **60**(1-2): p. 115-24.
- 683 22. Loike, J.D. and S.C. Silverstein, *A fluorescence quenching technique using trypan blue to*  
684 *differentiate between attached and ingested glutaraldehyde-fixed red blood cells in*  
685 *phagocytosing murine macrophages*. J Immunol Methods, 1983. **57**(1-3): p. 373-9.
- 686 23. Jevprasesphant, R., et al., *Transport of dendrimer nanocarriers through epithelial cells via the*  
687 *transcellular route*. J Control Release, 2004. **97**(2): p. 259-67.
- 688 24. Wan, C.P., C.S. Park, and B.H. Lau, *A rapid and simple microfluorometric phagocytosis assay*.  
689 J Immunol Methods, 1993. **162**(1): p. 1-7.
- 690 25. Ma, Z., et al., *GadE (YhiE) activates glutamate decarboxylase-dependent acid resistance in*  
691 *Escherichia coli K-12*. Molecular Microbiology, 2003. **49**(5): p. 1309-1320.
- 692 26. Svenson, J., et al., *Albumin binding of short cationic antimicrobial micropeptides and its*  
693 *influence on the in vitro bactericidal effect*. J Med Chem, 2007. **50**(14): p. 3334-9.

- 694 27. Findlay, B., G.G. Zhanel, and F. Schweizer, *Investigating the antimicrobial peptide 'window of*  
695 *activity' using cationic lipopeptides with hydrocarbon and fluorinated tails*. *Int J Antimicrob*  
696 *Agents*, 2012. **40**(1): p. 36-42.
- 697 28. Daugelavicius, R., E. Bakiene, and D.H. Bamford, *Stages of polymyxin B interaction with the*  
698 *Escherichia coli cell envelope*. *Antimicrob Agents Chemother*, 2000. **44**(11): p. 2969-78.
- 699 29. Brazas, M.D. and R.E. Hancock, *Using microarray gene signatures to elucidate mechanisms*  
700 *of antibiotic action and resistance*. *Drug Discov Today*, 2005. **10**(18): p. 1245-52.
- 701 30. Kanehisa, M. and S. Goto, *KEGG: kyoto encyclopedia of genes and genomes*. *Nucleic Acids*  
702 *Res*, 2000. **28**(1): p. 27-30.
- 703 31. Kanehisa, M., et al., *New approach for understanding genome variations in KEGG*. *Nucleic*  
704 *Acids Res*, 2019. **47**(D1): p. D590-D595.
- 705 32. Kanehisa, M., *Toward understanding the origin and evolution of cellular organisms*. *Protein Sci*,  
706 2019. **28**(11): p. 1947-1951.
- 707 33. Ashburner, M., et al., *Gene ontology: tool for the unification of biology. The Gene Ontology*  
708 *Consortium*. *Nat Genet*, 2000. **25**(1): p. 25-9.
- 709 34. The Gene Ontology, C., *The Gene Ontology Resource: 20 years and still GOing strong*. *Nucleic*  
710 *Acids Res*, 2019. **47**(D1): p. D330-D338.
- 711 35. Baba, T., et al., *Construction of Escherichia coli K-12 in-frame, single-gene knockout mutants:*  
712 *the Keio collection*. *Mol Syst Biol*, 2006. **2**: p. 2006 0008.
- 713 36. Vitale, A., et al., *Identification of Genes Required for Resistance to Peptidomimetic Antibiotics*  
714 *by Transposon Sequencing*. *Front Microbiol*, 2020. **11**: p. 1681.
- 715 37. Akbari, R., et al., *Highly Synergistic Effects of Melittin with Conventional Antibiotics Against*  
716 *Multidrug-Resistant Isolates of Acinetobacter baumannii and Pseudomonas aeruginosa*.  
717 *Microb Drug Resist*, 2019. **25**(2): p. 193-202.
- 718 38. Lazar, V., et al., *Antibiotic-resistant bacteria show widespread collateral sensitivity to*  
719 *antimicrobial peptides*. *Nat Microbiol*, 2018. **3**(6): p. 718-731.
- 720 39. Fernandez, L., et al., *The two-component system CprRS senses cationic peptides and triggers*  
721 *adaptive resistance in Pseudomonas aeruginosa independently of ParRS*. *Antimicrob Agents*  
722 *Chemother*, 2012. **56**(12): p. 6212-22.
- 723 40. Missiakas, D.M. and O. Schneewind, *Growth and laboratory maintenance of Staphylococcus*  
724 *aureus*. *Curr Protoc Microbiol*, 2013. **Chapter 9**: p. Unit 9C 1.
- 725 41. Schneider, C.A., W.S. Rasband, and K.W. Eliceiri, *NIH Image to ImageJ: 25 years of image*  
726 *analysis*. *Nat Methods*, 2012. **9**(7): p. 671-5.
- 727 42. Kremer, J.R., D.N. Mastronarde, and J.R. McIntosh, *Computer visualization of three-*  
728 *dimensional image data using IMOD*. *J Struct Biol*, 1996. **116**(1): p. 71-6.
- 729 43. Bolger, A.M., M. Lohse, and B. Usadel, *Trimmomatic: a flexible trimmer for Illumina sequence*  
730 *data*. *Bioinformatics*, 2014. **30**(15): p. 2114-20.
- 731 44. Anders, S., P.T. Pyl, and W. Huber, *HTSeq--a Python framework to work with high-throughput*  
732 *sequencing data*. *Bioinformatics*, 2015. **31**(2): p. 166-9.
- 733 45. Robinson, M.D., D.J. McCarthy, and G.K. Smyth, *edgeR: a Bioconductor package for*  
734 *differential expression analysis of digital gene expression data*. *Bioinformatics*, 2010. **26**(1): p.  
735 139-40.
- 736 46. Yamamoto, N., et al., *Update on the Keio collection of Escherichia coli single-gene deletion*  
737 *mutants*. *Mol Syst Biol*, 2009. **5**: p. 335.
- 738 47. Team, R.C., *R: A language and environment for statistical computing*. . 2019.
- 739 48. Carlson, M., *GO.db: A set of annotation maps describing the entire Gene Ontology*. 2019.
- 740 49. Gallagher, L.A., J. Shendure, and C. Manoil, *Genome-scale identification of resistance*  
741 *functions in Pseudomonas aeruginosa using Tn-seq*. *mBio*, 2011. **2**(1): p. e00315-10.
- 742 50. Gallagher, L.A., et al., *Sequence-defined transposon mutant library of Burkholderia*  
743 *thailandensis*. *mBio*, 2013. **4**(6): p. e00604-13.
- 744 51. Martin, M., *Cutadapt removes adapter sequences from high-throughput sequencing reads*.  
745 *EMBnet.journal*, 2011. **17**: p. 10-12.
- 746 52. Solaimanpour, S., F. Sarmiento, and J. Mrazek, *Tn-seq explorer: a tool for analysis of high-*  
747 *throughput sequencing data of transposon mutant libraries*. *PLoS One*, 2015. **10**(5): p.  
748 e0126070.
- 749 53. Winsor, G.L., et al., *Enhanced annotations and features for comparing thousands of*  
750 *Pseudomonas genomes in the Pseudomonas genome database*. *Nucleic Acids Res*, 2016.  
751 **44**(D1): p. D646-53.

753 **Tables:**

|                                                        | LB     | 12.5 % FCS | 25 % FCS | 50 % FCS | 12.5 mg/ml BSA | 25 mg/ml BSA | 50 mg/ml BSA |
|--------------------------------------------------------|--------|------------|----------|----------|----------------|--------------|--------------|
| <b>TATrasGAP<sub>317-326</sub> (<math>\mu</math>M)</b> | 8      | 16-32      | 32       | 16       | 8              | 16-32        | 8-32         |
| <b>Melittin (<math>\mu</math>g/ml)</b>                 | 64-128 | 128-256    | 256      | >256     | 256            | >256         | >256         |

754

755 **Table 1: MIC of TAT-RasGAP<sub>317-326</sub> on *E. coli* MG1655 is increased by 2-4 fold in**  
756 **presence of serum or albumin.** *E. coli* MG1655 was grown in LB overnight, diluted to 0.1  
757 OD<sub>600</sub> and grown for 1h. Culture was then diluted 20 times and 10  $\mu$ l was added per well of a  
758 96-well plate containing serial dilutions of TAT-RasGAP<sub>317-326</sub> or melittin in presence of the  
759 indicated quantities of fetal calf serum (FCS) or bovine serum albumin (BSA). The plate was  
760 then incubated at 37°C for 16 hours and MICs were quantified by turbidity measurement in 96  
761 well plates. MIC was defined at the lowest AMP concentration that totally inhibited growth.  
762 Range of results of three independent experiments is indicated. When no range is indicated,  
763 all experiments performed gave the same result.

764

765

| locus_tag  | gene_symbol | description                                                    | Category                       | log <sub>2</sub> (FC_BM2vsTATrasGAP) | Hypersensitivity to PoIB | E. coli homologues | Keio screening       |
|------------|-------------|----------------------------------------------------------------|--------------------------------|--------------------------------------|--------------------------|--------------------|----------------------|
| PA14_41260 | parR        | two-component response regulator                               | Two-component regulator system | -4.268533546                         | Yes                      | rstA               | Hypersensitive (2/2) |
| PA14_41270 | parS        | two-component sensor                                           | Two-component regulator system | Inf                                  | Yes                      | rstB               | Hypersensitive (2/2) |
| PA14_49180 | phoP        | two-component response regulator PhoP                          | Two-component regulator system | Inf                                  | Yes                      | phoP               | Hypersensitive (2/2) |
| PA14_56950 | colR        | two-component response regulator                               | Two-component regulator system | Inf                                  | Yes                      | cusR               | More sensitive (1/2) |
| PA14_63160 | pmrB        | PmrB: two-component regulator system signal sensor kinase PmrB | Two-component regulator system | -3.492272393                         | Yes                      | qseC               | Hypersensitive (2/2) |
| PA14_02390 |             | transcriptional regulator                                      | Transcription regulation       | -5.436478184                         |                          | cynR               | Hypersensitive (2/2) |
| PA14_04160 |             | transcriptional regulator                                      | Transcription regulation       | -1.231246313                         |                          | yjiK               | Hypersensitive (1/2) |
| PA14_70450 | rpoZ        | DNA-directed RNA polymerase subunit omega                      | Transcription regulation       | -1.69421829                          |                          | rpoZ               | Hypersensitive (2/2) |
| PA14_65200 | rnr         | exoribonuclease RNase R                                        | Translation regulation         | -1.623618886                         |                          | rnr                | More sensitive (1/2) |
| PA14_18330 | arnT        | 4-amino-4-deoxy-L-arabinose transferase                        | LPS biosynthesis               | Inf                                  | Yes                      | arnT               | More sensitive (1/2) |
| PA14_71970 | wbpW        | GDP-mannose pyrophosphorylase                                  | LPS biosynthesis               | -4.335647742                         |                          | cpsB               | Hypersensitive (2/2) |
| PA14_18690 |             | peroxidase                                                     | Oxido-reduction                | -1.121328621                         |                          | ahpC               | More sensitive (1/2) |
| PA14_31920 | opmB        | outer membrane protein                                         | Transmembrane transport        | -5.044160761                         |                          | cusC               | More sensitive (1/2) |
| PA14_42700 | alkA        | DNA-3-methyladenine glycosidase II                             | DNA repair                     | -1.276606847                         |                          | alkA               | Hypersensitive (1/2) |
| PA14_52890 |             | ring-cleaving dioxygenase                                      | Antibiotic resistance          | -1.036324267                         |                          | gloA               | Hypersensitive (1/2) |

766

767 **Table 2: Genes found as more sensitive in both *P. aeruginosa* by transposon library**  
768 **screening and in *E. coli* by Keio collection screening.** List of the genes, which mutants  
769 were found as sensitive in transposon library screening in *P. aeruginosa* and whose  
770 orthologues in *E. coli* were detected as sensitive in Keio collection screening. Transposon  
771 mutants of *P. aeruginosa* were incubated in presence or absence of 0.5 μM TAT-RasGAP<sub>317-</sub>  
772 <sub>326</sub> in BM2 Mg<sup>low</sup> medium for 12 generations. Transposon junctions were amplified and  
773 sequenced. Fold change (FC) between abundance of transposon mutants with incubation in  
774 absence (BM2) or presence (TATrasGAP) of the peptide was calculated and values are  
775 presented as Log<sub>2</sub> of the FC. Inf indicates that no mutant was detected upon peptide treatment,  
776 so Log<sub>2</sub> of the FC could not be calculated. Results obtained in a former study using the same

777 transposon library indicate that some gene mutations cause also hypersensitivity to polymyxin  
778 B [36]. Ratio in Keio screening column indicates whether sensitivity was detected in both  
779 deletion mutants of the collection (2/2) or only with one (1/2).

780  
781  
782  
783  
784

|                      | TAT-RasGAP <sub>317-326</sub> | Polymyxin B | Melittin | LL-37 |
|----------------------|-------------------------------|-------------|----------|-------|
| <i>E. coli</i>       | 16                            | 0.5         | 0.5      | 0.5   |
| <i>P. aeruginosa</i> | 4                             | 2           | >2       | n.d.  |
| <i>S. capitis</i>    | 32                            | >2          | 2        | n.d.  |
| <i>S. aureus</i>     | >4                            | n.d.        | 8        | n.d.  |

785

786 **Table 3: MICs of TAT-RasGAP<sub>317-326</sub>-resistant strains towards other AMPs.** Fold  
787 change of MICs between the original strains (*E. coli* MG1655, *P. aeruginosa* PA14, *S. capitis*  
788 and *S. aureus* ATCC 29213) and strains exposed to increasing concentrations of TAT-  
789 RasGAP<sub>317-326</sub> for 20 passages. MICs were measured as described for Fig. 1. n.d.: not  
790 determined: MIC of the strain could not be determined.

791



792 **Figure legends:**

793

794 **Figure 1: *E. coli* MG1655 and *P. aeruginosa* PA14 sensitivity to TAT-RasGAP<sub>317-326</sub>**  
795 **varies depending on the growth medium used.** *E. coli* MG1655 was grown overnight in the  
796 indicated medium, diluted to 0.1 OD<sub>600</sub> and grown for 1h. Culture was then diluted 20 times  
797 and 10 µl was added per well of a 96-well plate containing serial dilutions of TAT-RasGAP<sub>317-</sub>  
798 <sub>326</sub>. OD<sub>600</sub> measurements after 16 hours of incubation in presence of the indicated  
799 concentrations of TAT-RasGAP<sub>317-326</sub> are shown and MIC is defined as the lowest  
800 concentration of TAT-RasGAP<sub>317-326</sub> that completely inhibits bacterial proliferation. IC<sub>50</sub> is  
801 defined as the concentration required to inhibit 50 % of growth and was calculated using  
802 GraphPad Prism 8. Indicated strains were grown overnight and diluted respectively in LB (**A-**  
803 **B**), BM2 with 2mM MgSO<sub>4</sub> (Mg<sup>low</sup>) (**C-D**) or BM2 with 20 µM MgSO<sub>4</sub> (Mg<sup>high</sup>) (**E-F**).

804

805 **Figure 2: Low pH and high buffering capacities of medium differently affect activity**  
806 **of TAT-RasGAP<sub>317-326</sub>.** **A-F)** *E. coli* MG1655 was grown overnight at 37°C in LB medium  
807 containing 100 mM MES at the indicated pH (A-D), non-buffered LB at pH 7 (E) or LB  
808 supplemented with 100 mM sorbitol (F). Cultures were diluted to 0.1 OD<sub>600</sub> in the same  
809 medium and grown one hour at 37°C before addition or not of the indicated concentrations of  
810 TAT-RasGAP<sub>317-326</sub>. OD<sub>600</sub> was measured at the indicated time points. **G)** *E. coli* MG1655 were  
811 treated as in (A-F) and FITC-labelled TAT-RasGAP<sub>317-326</sub> was added either at 37°C or on ice.  
812 Fluorescence was then quantified using flow cytometry. MFI: geometric mean of fluorescence  
813 intensity. Control are unlabeled bacteria. **H)** FITC signal after quenching with Trypan Blue.

814

815 **Figure 3: TAT-RasGAP<sub>317-326</sub> is bactericidal against *E. coli* and *P. aeruginosa*.** **A-D)**  
816 Overnight cultures of *E. coli* MG1655 in LB (A-B) and *P. aeruginosa* PA14 in BM2 Mg<sup>low</sup> (C-D)  
817 were diluted to 0.1 OD<sub>600</sub>. Peptide was added at the indicated concentrations 1 hour after  
818 dilution. Samples were taken at the indicated time points, serially diluted 10-fold in fresh LB

819 and plated on LB agar plates. Number of colony forming unit per ml (CFU/ml) of original culture  
820 was calculated. **E)** *E. coli* MG1655 strain was incubated for one hour with or without 10  $\mu$ M  
821 FITC-labelled TAT-RasGAP<sub>317-326</sub>. The bacterial sample was then labelled with 5  $\mu$ g/ml FM4-  
822 64 and fixed with 4% paraformaldehyde solution. Incubation with DAPI was subsequently  
823 performed. Pictures were taken with a Zeiss LSM710 confocal microscope and analyzed using  
824 ImageJ software. **F)** *E. coli* bacteria treated as in (E) were fixed using glutaraldehyde and  
825 prepared for electron microscopy as described in Material and Methods section. Samples were  
826 imaged using transmission electron microscopy. Images were analyzed using ImageJ  
827 software.

828

829 **Figure 4: TAT-RasGAP<sub>317-326</sub> remodels the transcriptional landscape of *E. coli*.** RNA-  
830 seq analysis was performed on *E. coli* grown for 1h in the presence or absence of TAT-  
831 RasGAP<sub>317-326</sub>. **A)** MA-plot of the average gene expression (x-axis, RPKM: read per kilobase  
832 million) vs the differential expression (y-axis). Threshold for gene expression is indicate with  
833 the blue horizontal line. The red lines indicate the limits for upregulated (red dots) and  
834 downregulated (blue dots) genes. **B)** Correlation between RNA-seq ( $\log_2$  Fold Change) and  
835 qRT-PCR ( $\log_2$  Relative Quantification) differential expression for a set of genes. **C-D)** Fraction  
836 of KEGG pathway genes that are upregulated (B) or downregulated (C) after treatment with  
837 TAT-RasGAP<sub>317-326</sub>. Dot size indicates the number of genes in the selection.

838

839 **Figure 5: Selection of hypersensitive and resistant *E. coli* deletion strains from**  
840 **KEIO collection.** Single gene deletion strains were grown in LB medium with or without 5  $\mu$ M  
841 TAT-RasGAP<sub>317-326</sub> and OD<sub>590</sub> was measured at 0, 1.5, 3, 6, and 24 hours. **A-B)** Distribution  
842 of the fold change of the normalised growth (NG) with TAT-RasGAP<sub>317-326</sub> vs without peptide  
843 at 6h (A) and 24h (B). The mean of the wild-type strain and the standard deviation (SD) are  
844 indicated with the vertical solid and dashed lines, respectively. Arrows indicate the strains  
845 selected as resistant, hypersensitive and more sensitive. **C)** Growth curves of wild-type

846 (n=270), hypersensitive (n=356) and resistant (n=20) strains. Data are mean  $\pm$  SD. **D)** Top 10  
847 most represented KEGG pathways among hypersensitive strains. The number of  
848 hypersensitive strains in each pathway was normalised to the number of KEIO collection  
849 strains in the corresponding pathway. **E)** Biological processes GO term enrichment analysis  
850 with the 10 most represented terms among the hypersensitive strains.

851

852 **Figure 6: TAT-RasGAP<sub>317-326</sub> shows no synergism with melittin, LL-37 and**  
853 **polymyxin B.** *E. coli* MG1655 was grown overnight, diluted to 0.1 OD<sub>600</sub>, and grown further  
854 during one hour before addition of the indicated AMPs. OD<sub>600</sub> was measured at 2, 4 and 6h.  
855 For each AMP, two concentrations were tested: **(A)** a non-inhibitory concentration and **(B)** an  
856 inhibitory concentration corresponding to twice that of panel A. **C)** Combinations of AMPs were  
857 then tested and growth at 6h was expressed as percentage of growth compared to an  
858 untreated control. **D)** Sub-inhibitory concentration of melittin interfered with TAT-RasGAP<sub>317-</sub>  
859 <sub>326</sub> activity. Indicated AMPs were added and OD<sub>600</sub> was measured as in (A). **E)** Bacteria were  
860 treated as in (A), but FITC-labelled TAT-RasGAP<sub>317-326</sub> was added and flow cytometry was  
861 performed in the indicated conditions. MFI: geometric mean of fluorescence intensity. Control  
862 are unlabeled bacteria. **F)** FITC signal after quenching with Trypan Blue.

863

864 **Figure 7: Bacterial resistance against TAT-RasGAP<sub>317-326</sub> appears after selection**  
865 **with subinhibitory concentrations of peptide.** The indicated strains were incubated in  
866 presence or absence of 0.5 MIC of TAT-RasGAP<sub>317-326</sub>. Cultures were then diluted each day  
867 in medium containing either the same concentration of the peptide or double the concentration.  
868 Once bacterial growth was detected in the culture exposed to an elevated concentration of the  
869 peptide, the process was repeated thereby exposing the bacterial culture to sequentially  
870 increasing concentrations of peptide for a total of 20 passages. MIC of each passage was then  
871 measured and is presented as a fold change compared to the MIC of the original strain.

872

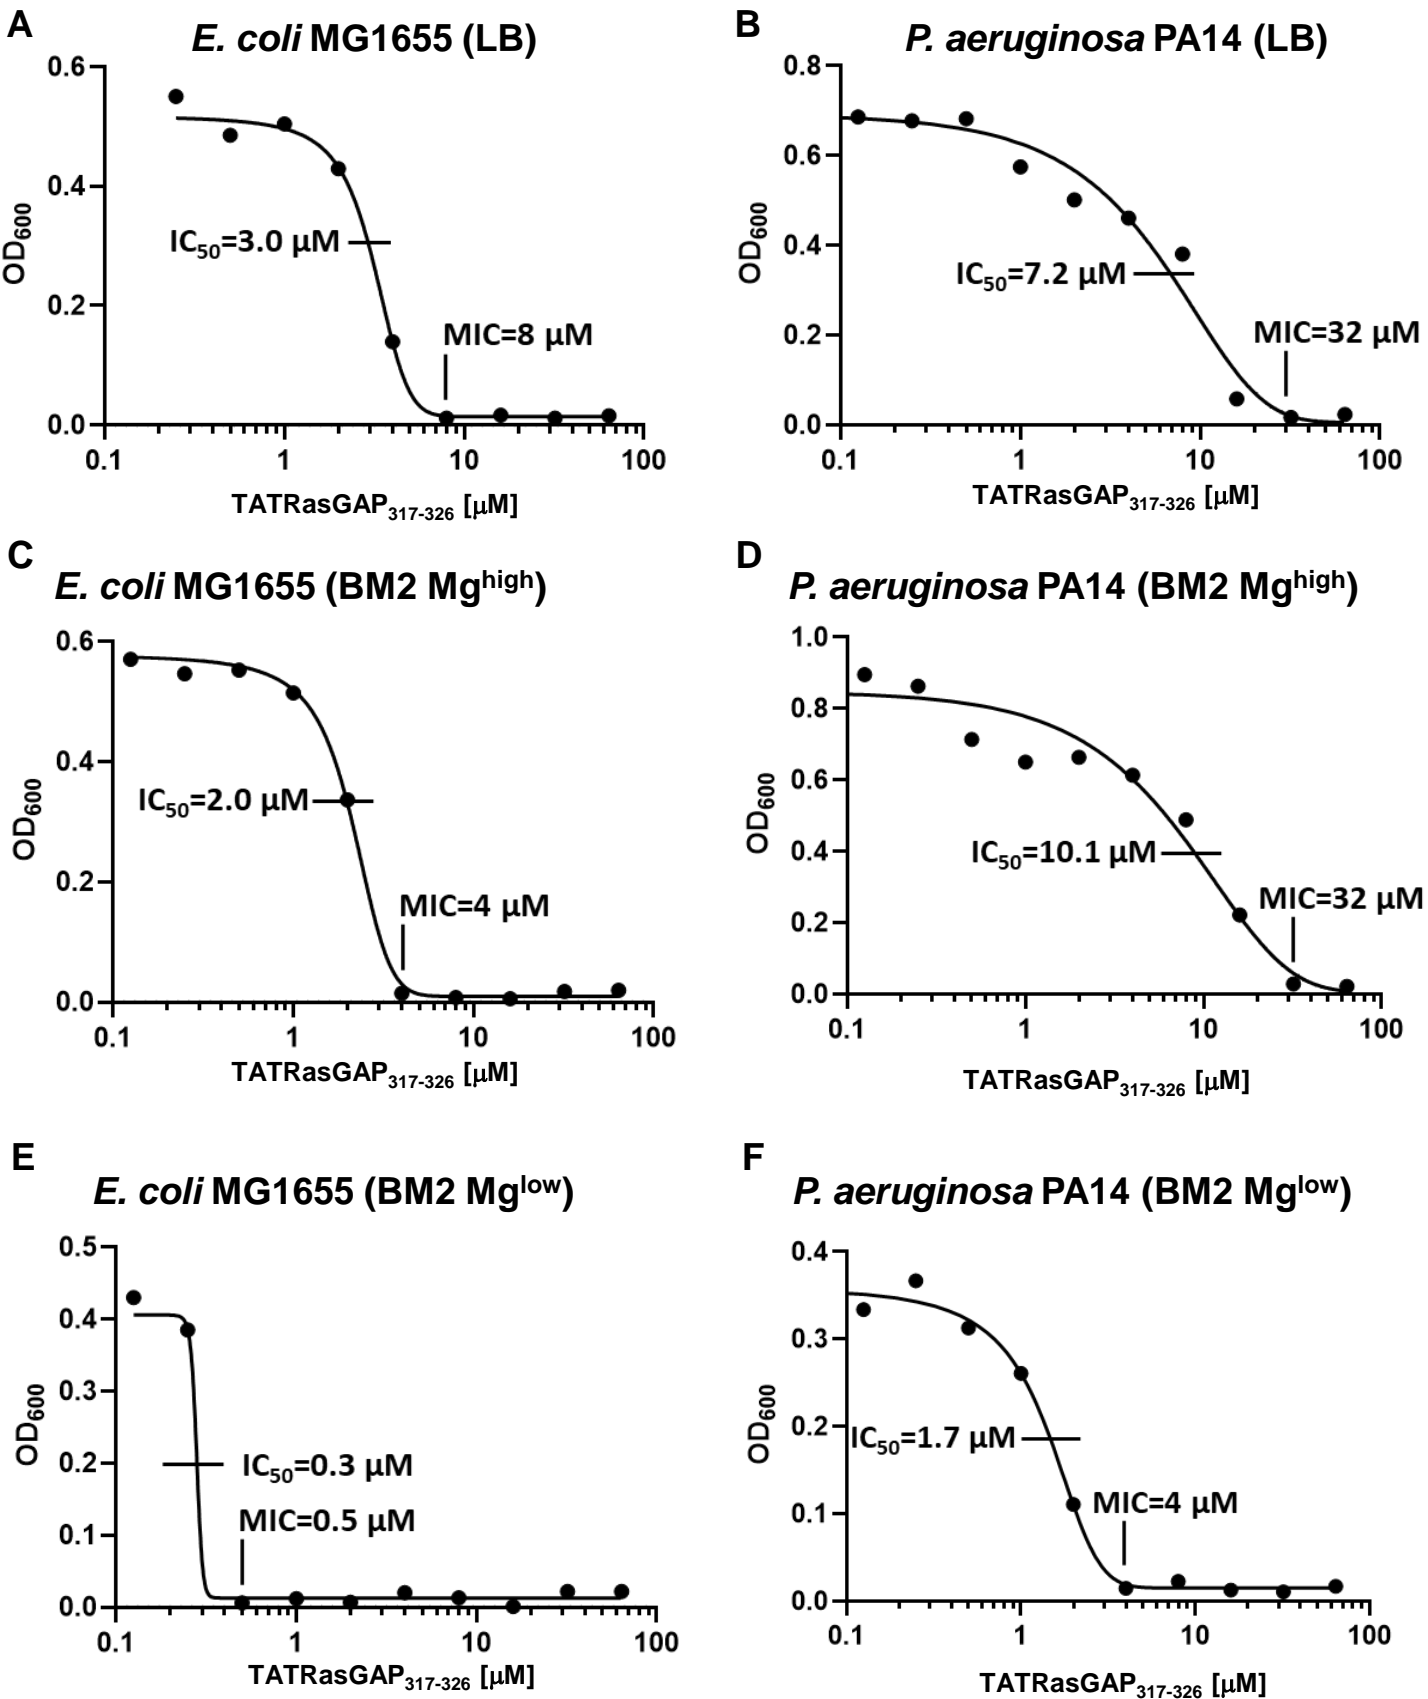

**Figure 1: *E. coli* MG1655 and *P. aeruginosa* PA14 sensitivity to TAT-RasGAP<sub>317-326</sub> varies depending on the growth medium used.** *E. coli* MG1655 was grown overnight in the indicated medium, diluted to 0.1 OD<sub>600</sub> and grown for 1h. Culture was then diluted 20 times and 10 μl was added per well of a 96-well plate containing serial dilutions of TAT-RasGAP<sub>317-326</sub>. OD<sub>600</sub> measurements after 16 hours of incubation in presence of the indicated concentrations of TAT-RasGAP<sub>317-326</sub> are shown and MIC is defined as the lowest concentration of TAT-RasGAP<sub>317-326</sub> that completely inhibits bacterial proliferation. IC<sub>50</sub> is defined as the concentration required to inhibit 50 % of growth and was calculated using GraphPad Prism 8. Indicated strains were grown overnight and diluted respectively in LB (A-B), BM2 with 2mM MgSO<sub>4</sub> (Mg<sup>low</sup>) (C-D) or BM2 with 20 μM MgSO<sub>4</sub> (Mg<sup>high</sup>) (E-F).

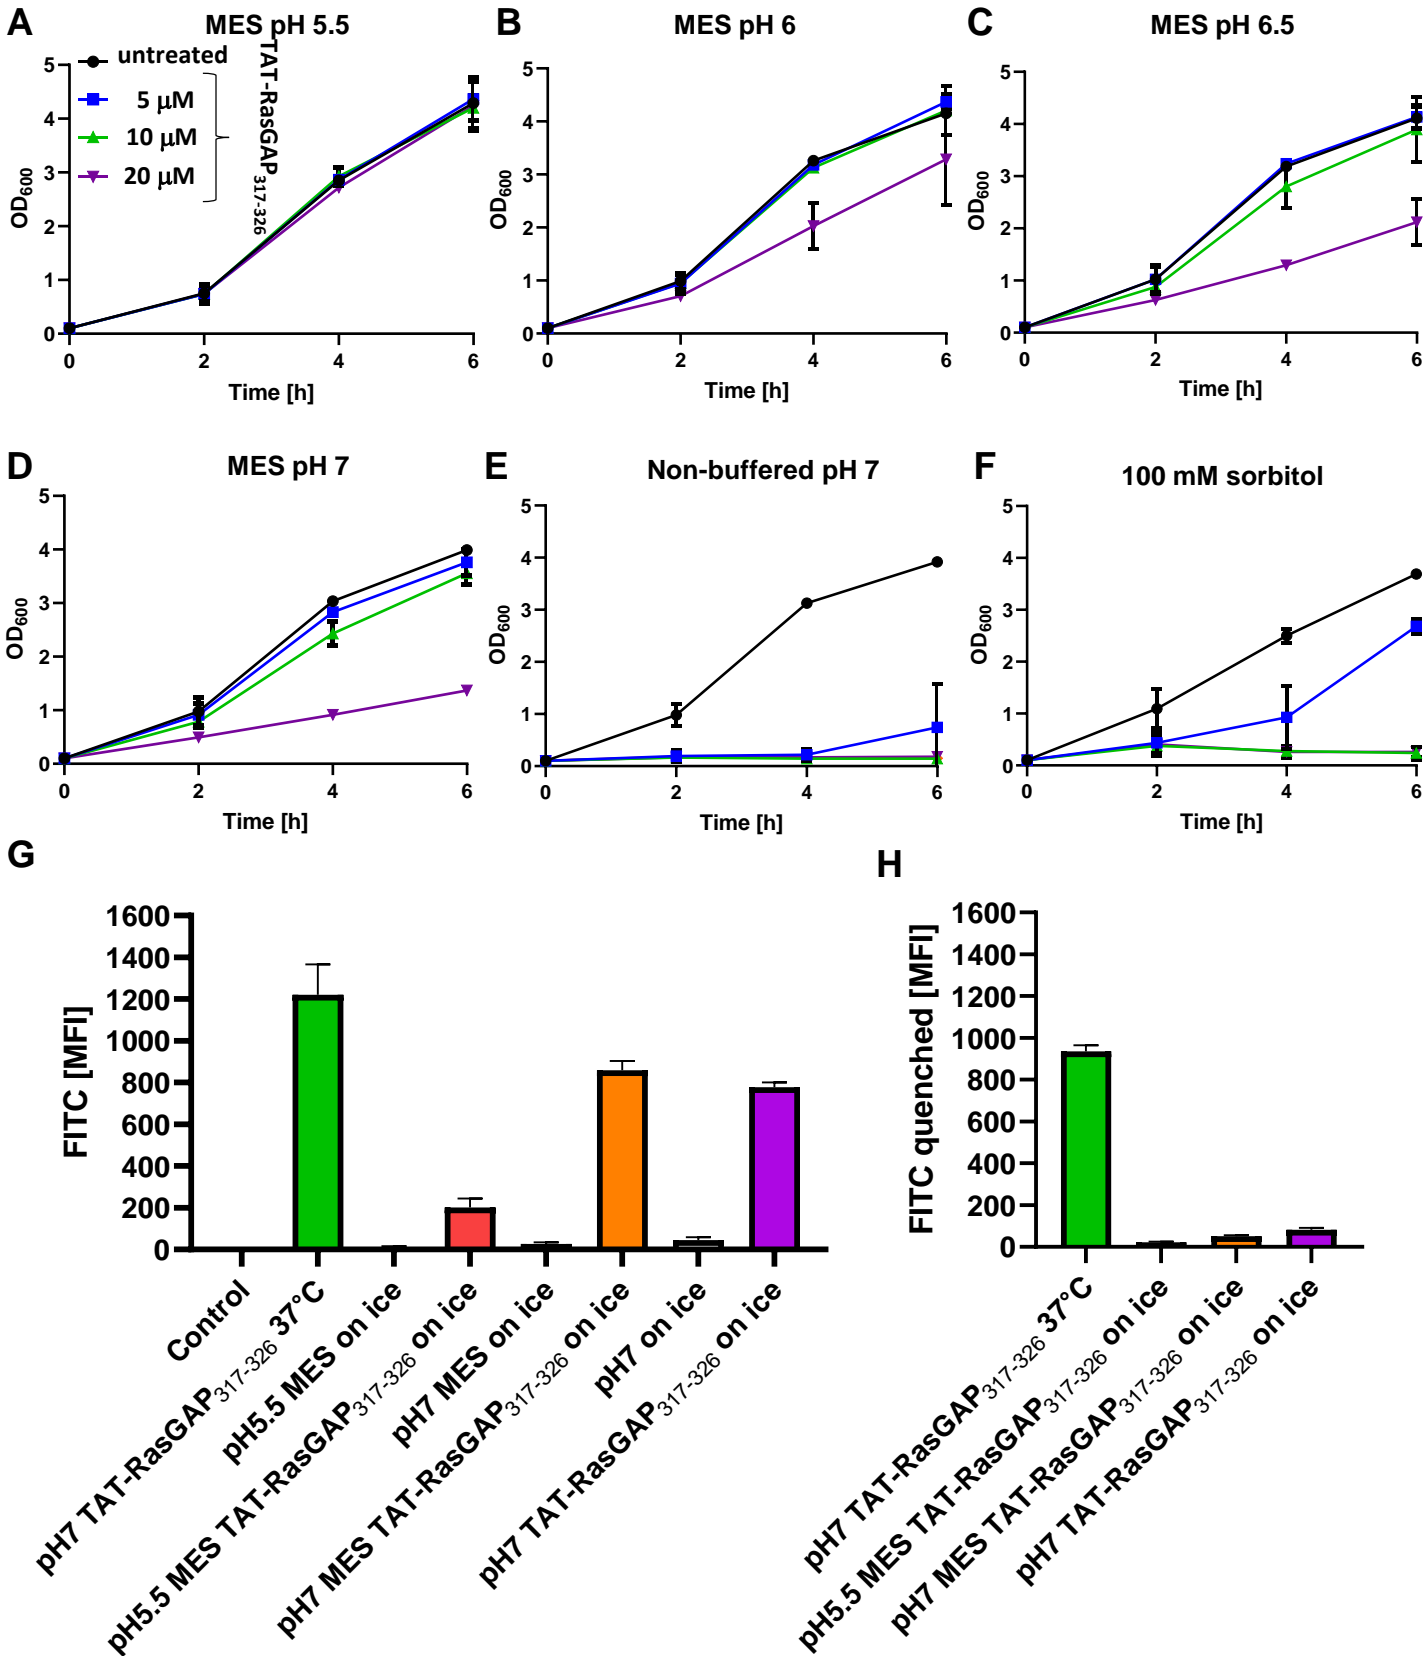

**Figure 2: Low pH and high buffering capacities of medium differently affect activity of TAT-RasGAP<sub>317-326</sub>.** A-F) *E. coli* MG1655 was grown overnight at 37°C in LB medium containing 100 mM MES at the indicated pH (A-D), non-buffered LB at pH 7 (E) or LB supplemented with 100 mM sorbitol (F). Cultures were diluted to 0.1 OD<sub>600</sub> in the same medium and grown one hour at 37°C before addition or not of the indicated concentrations of TAT-RasGAP<sub>317-326</sub>. OD<sub>600</sub> was measured at the indicated time points. G) *E. coli* MG1655 were treated as in (A-F) and FITC-labelled TAT-RasGAP<sub>317-326</sub> was added either at 37°C or on ice. Fluorescence was then quantified using flow cytometry. MFI: geometric mean of fluorescence intensity. Control are unlabeled bacteria. H) Extracellular FITC signal after quenching with trypan blue.

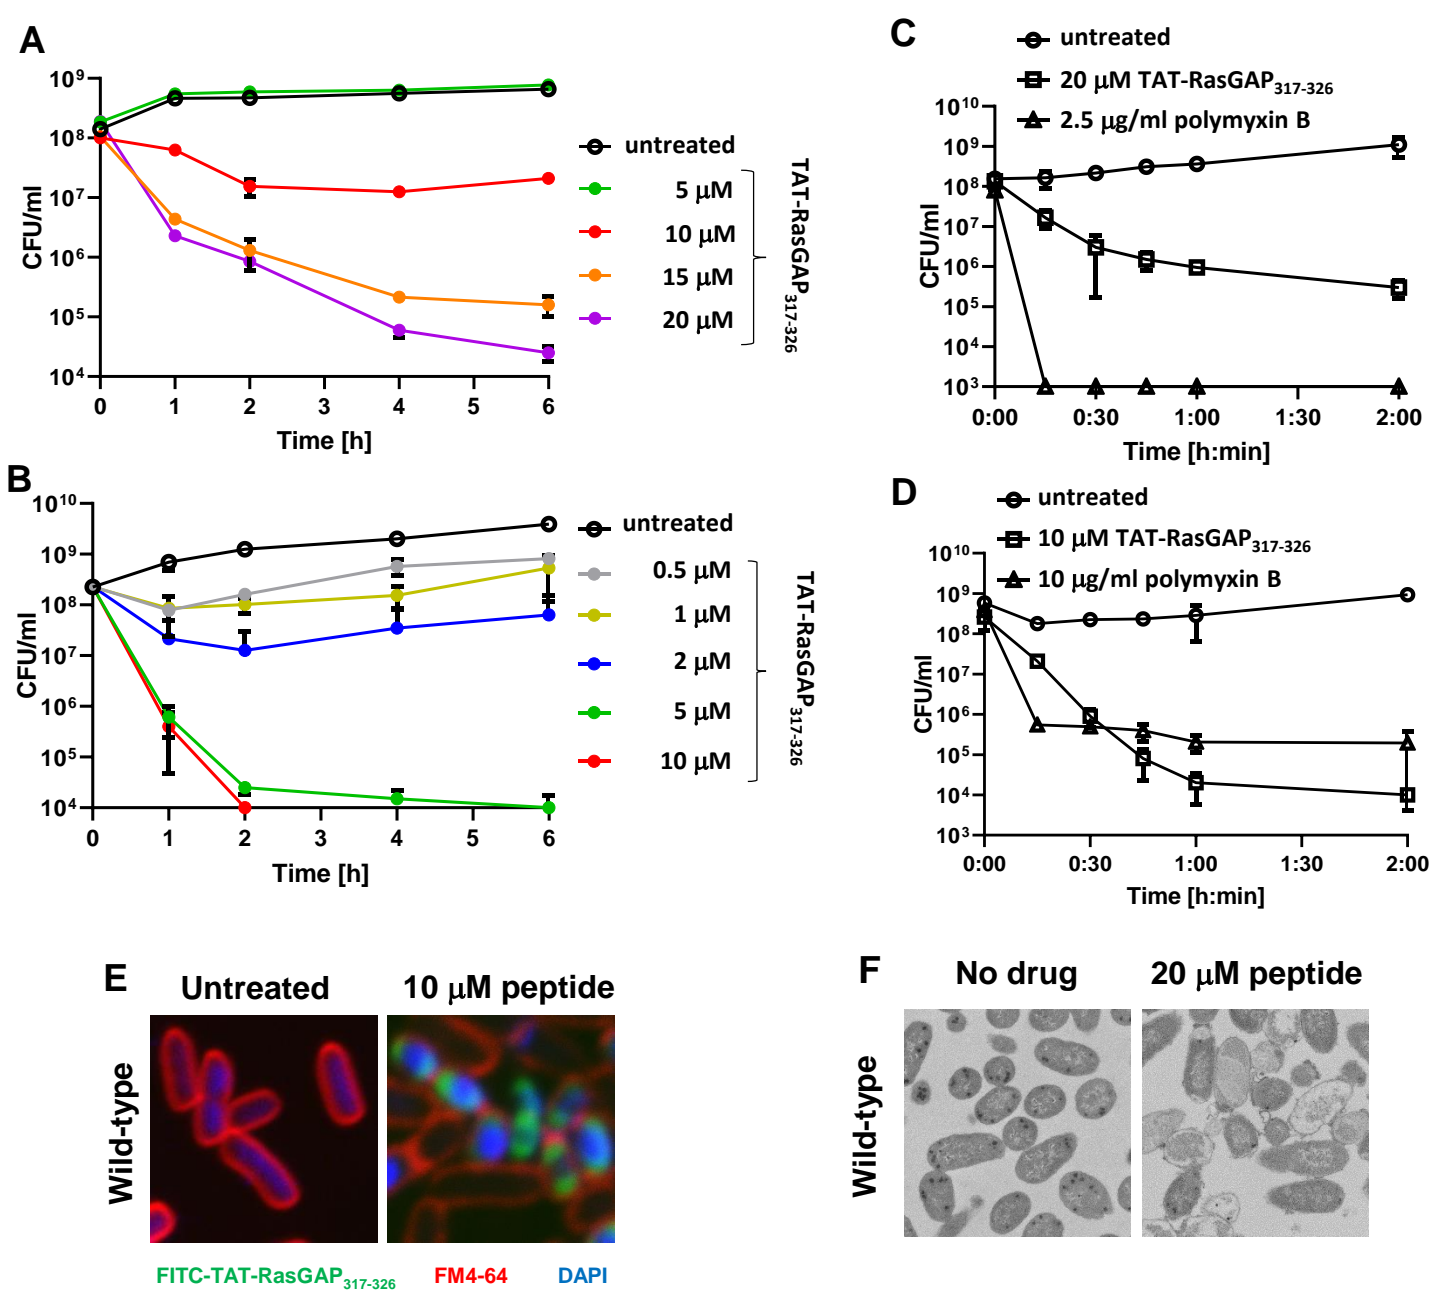

**Figure 3: TAT-RasGAP<sub>317-326</sub> is bactericidal against *E. coli* and *P. aeruginosa*.** A-D) Overnight cultures of *E. coli* MG1655 in LB (A-B) and *P. aeruginosa* PA14 in BM2 Mg<sup>low</sup> (C-D) were diluted to 0.1 OD<sub>600</sub>. Peptide was added at the indicated concentrations 1 hour after dilution. Samples were taken at the indicated time points, serially diluted 10-fold in fresh LB and plated on LB agar plates. Number of colony forming unit per ml (CFU/ml) of original culture was calculated. E) *E. coli* MG1655 strain was incubated for one hour with or without 10  $\mu$ M FITC-labelled TAT-RasGAP<sub>317-326</sub>. The bacterial sample was then labelled with 5  $\mu$ g/ml FM4-64 and fixed with 4% paraformaldehyde solution. Incubation with DAPI was subsequently performed. Pictures were taken with a Zeiss LSM710 confocal microscope and analyzed using ImageJ software. F) *E. coli* bacteria treated as in (E) were fixed using glutaraldehyde and prepared for electron microscopy as described in Material and Methods section. Samples were imaged using transmission electron microscopy. Images were analyzed using ImageJ software.

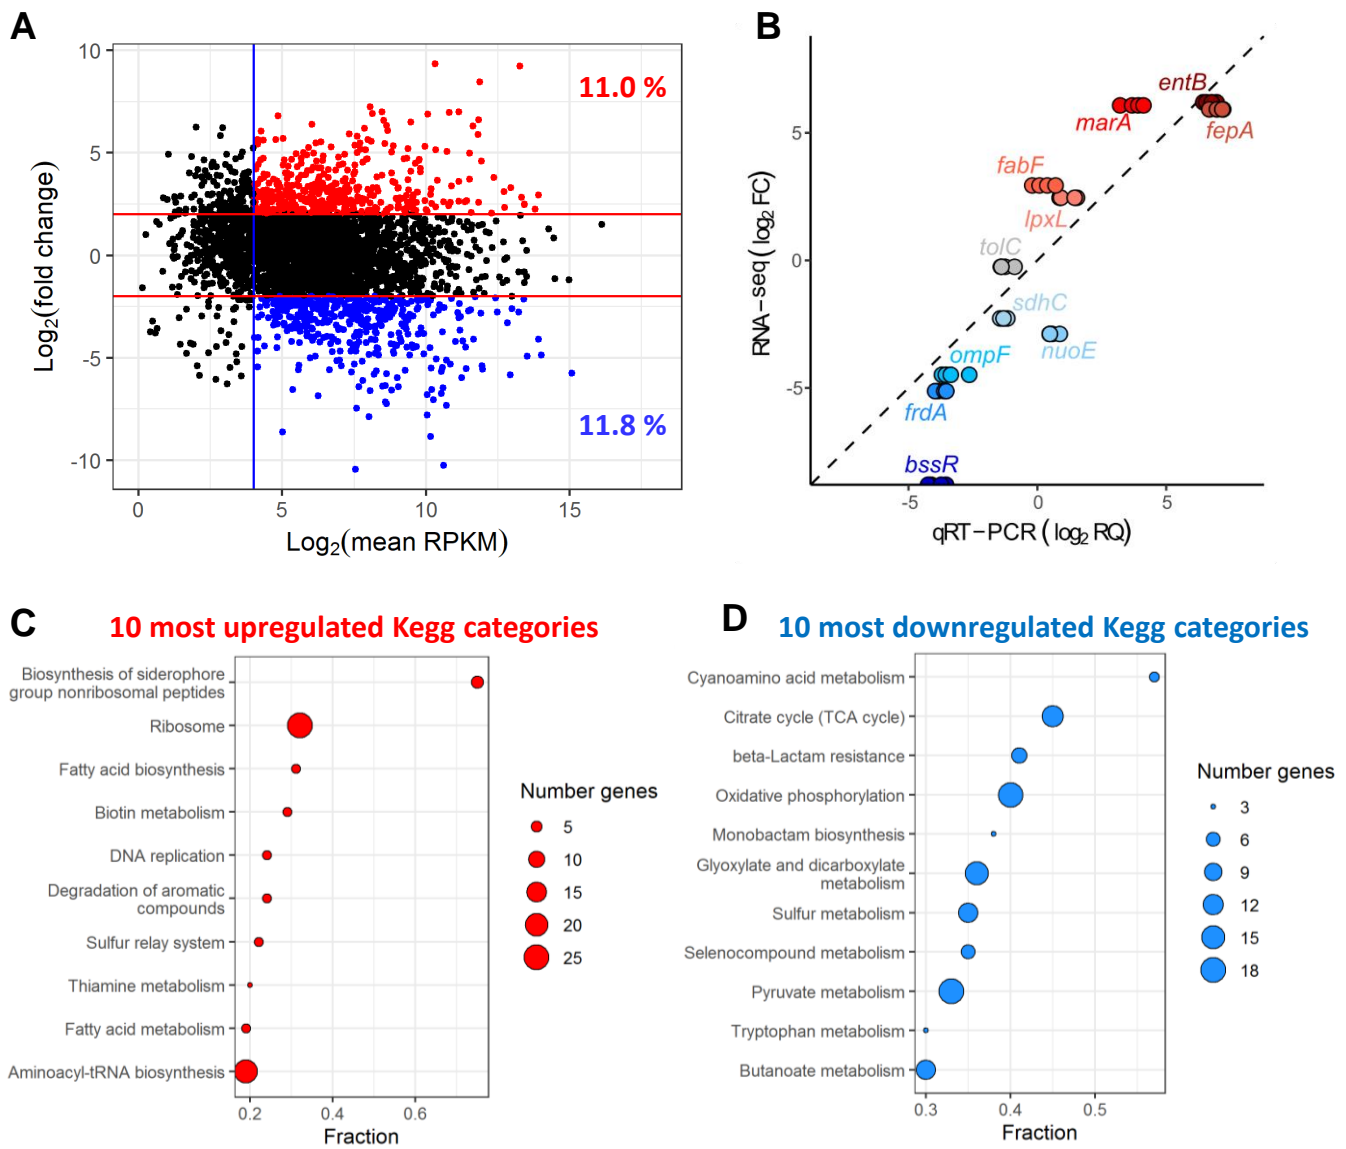

**Figure 4: TAT-RasGAP<sub>317-326</sub> remodels the transcriptional landscape of *E. coli*.** RNA-seq analysis was performed on *E. coli* grown for 1h in the presence or absence of TAT-RasGAP<sub>317-326</sub>. **A)** MA-plot of the average gene expression (x-axis, RPKM: read per kilobase million) vs the differential expression (y-axis). Threshold for gene expression is indicated with the blue horizontal line. The red lines indicate the limits for upregulated (red dots) and downregulated (blue dots) genes. **B)** Correlation between RNA-seq ( $\log_2$  Fold Change) and qRT-PCR ( $\log_2$  Relative Quantification) differential expression for a set of genes. **C-D)** Fraction of KEGG pathway genes that are upregulated (C) or downregulated (D) after treatment with TAT-RasGAP<sub>317-326</sub>. Dot size indicates the number of genes in the selection.



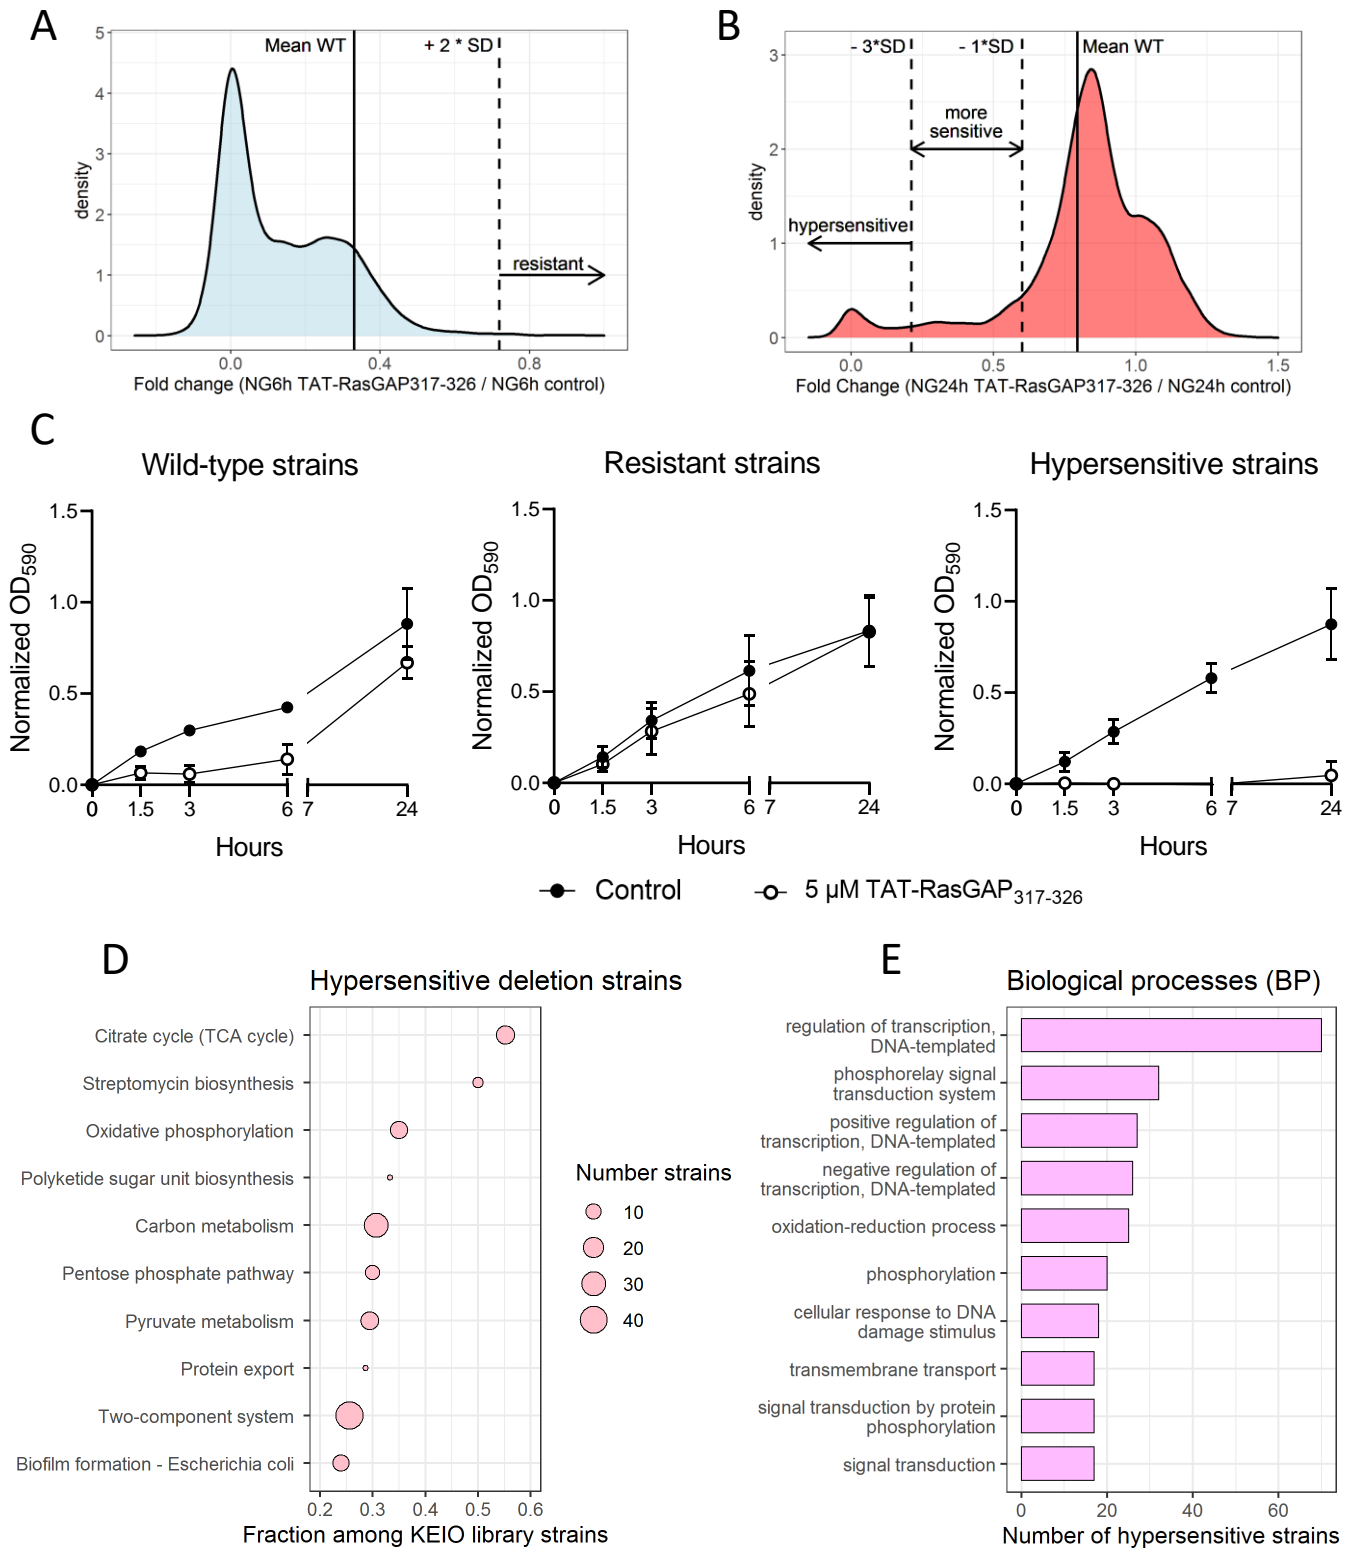

**Figure 5: Selection of hypersensitive and resistant *E. coli* deletion strains from KEIO collection.** Single gene deletion strains were grown in LB medium with or without 5 μM TAT-RasGAP<sub>317-326</sub> and OD<sub>590</sub> was measured at 0, 1.5, 3, 6, and 24 hours. **A-B)** Distribution of the fold change of the normalised growth (NG) with TAT-RasGAP<sub>317-326</sub> vs without peptide at 6h (A) and 24h (B). The mean of the wild-type strain and the standard deviation (SD) are indicated with the vertical solid and dashed lines, respectively. Arrows indicate the strains selected as resistant, hypersensitive and more sensitive. **C)** Growth curves of wild-type (n=270), hypersensitive (n=356) and resistant (n=20) strains. Data are mean ± SD. **D)** Top 10 most represented KEGG pathways among hypersensitive strains. The number of hypersensitive strains in each pathway was normalised to the number of KEIO collection strains in the corresponding pathway. **E)** Biological processes GO term enrichment analysis with the 10 most represented terms among the hypersensitive strains.

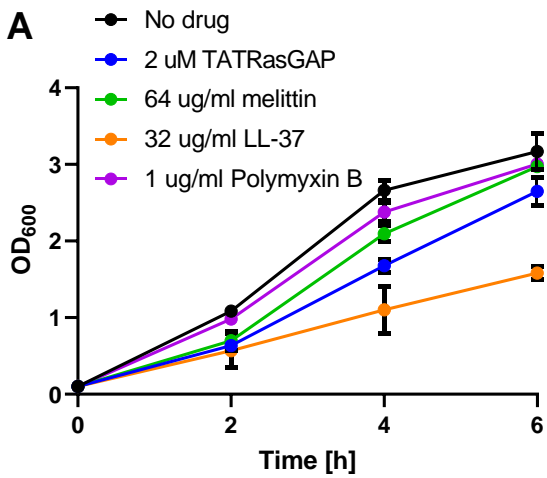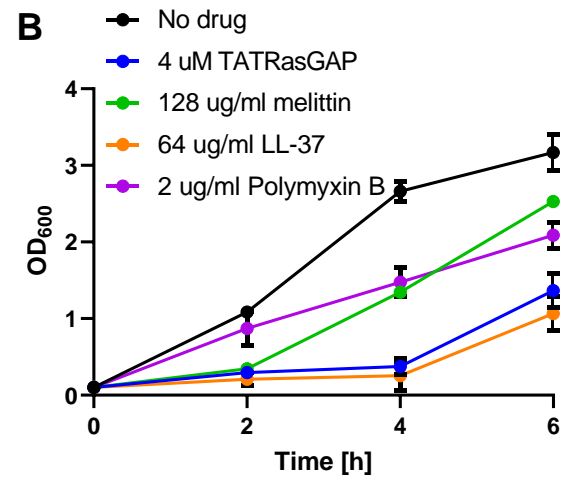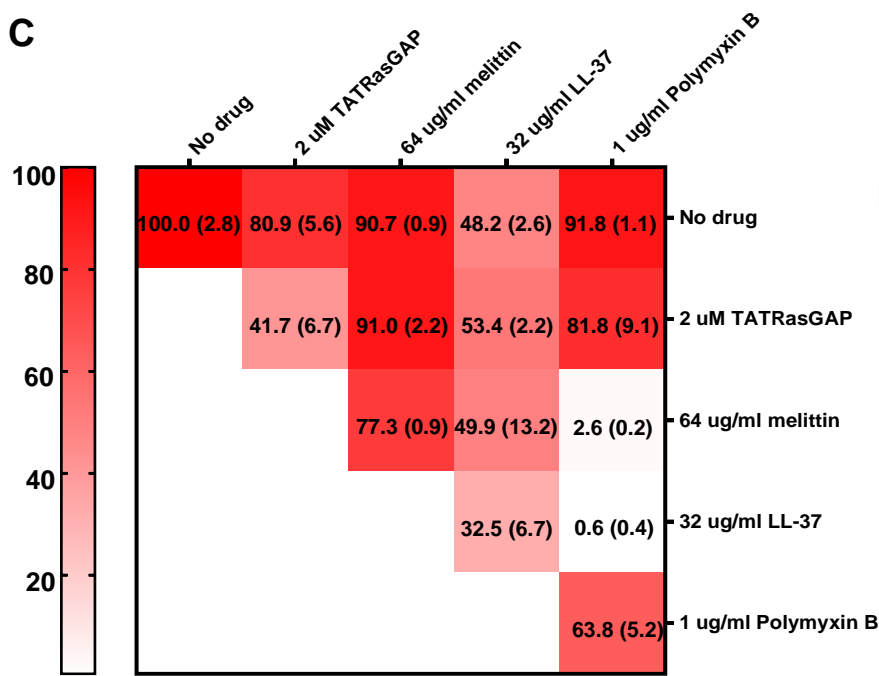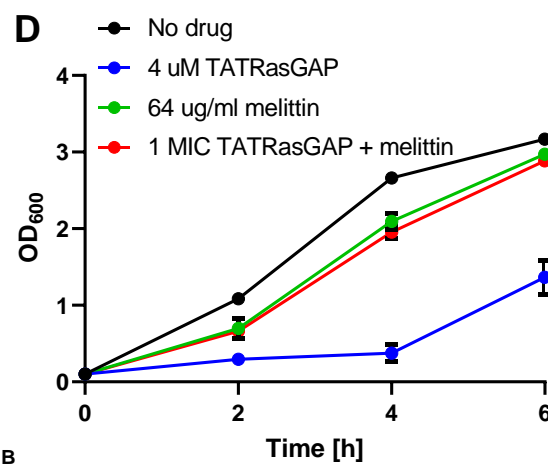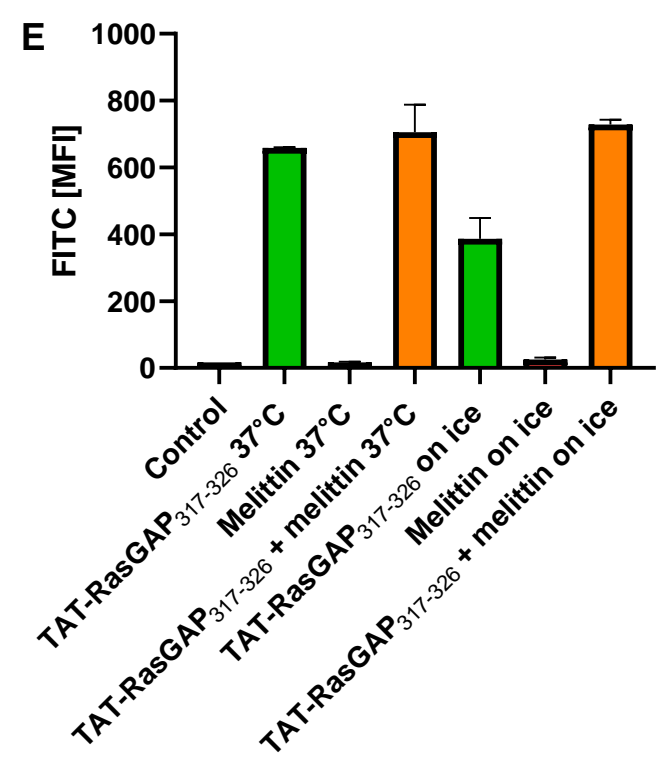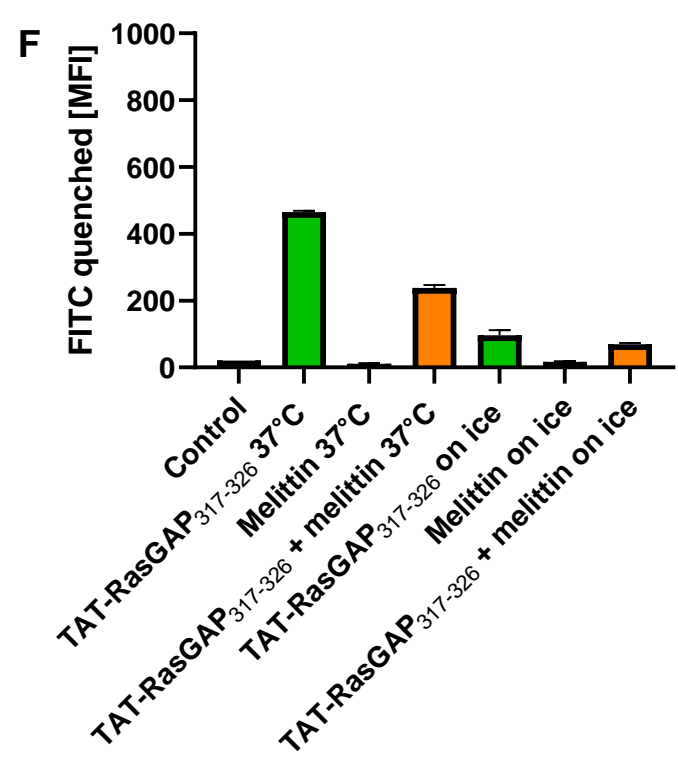

**Figure 6: TAT-RasGAP<sub>317-326</sub> shows no synergism with melittin, LL-37 and polymyxin B.** *E. coli* MG1655 was grown overnight, diluted to 0.1 OD<sub>600</sub>, and grown further during one hour before addition of the indicated AMPs. OD<sub>600</sub> was measured at 2, 4 and 6h. For each AMP, two concentrations were tested: **(A)** a non-inhibitory concentration and **(B)** an inhibitory concentration corresponding to twice that of panel A. **(C)** Combinations of AMPs were then tested and growth at 6h was expressed as percentage of growth compared to an untreated control. **(D)** Sub-inhibitory concentration of melittin interfered with TAT-RasGAP<sub>317-326</sub> activity. Indicated AMPs were added and OD<sub>600</sub> was measured as in (A). **(E)** Bacteria were treated as in (A), but FITC-labelled TAT-RasGAP<sub>317-326</sub> was added and flow cytometry was performed in the indicated conditions. MFI: geometric mean of fluorescence intensity. Control are unlabeled bacteria **(F)** Extracellular fluorescence after quenching with trypan blue.

*E. coli*

*P. aeruginosa*

*S. capitis*

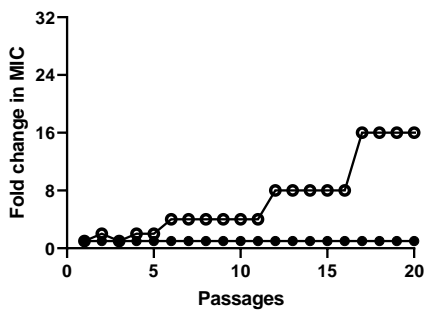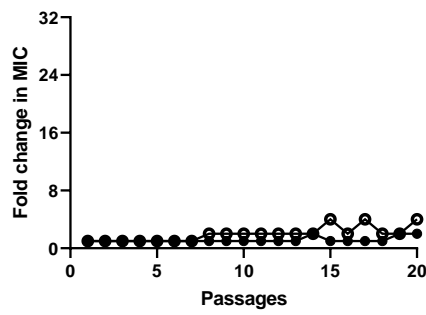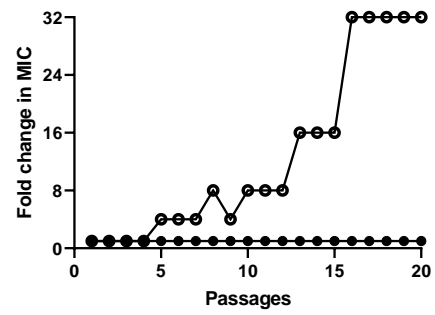

**Figure 7: Bacterial resistance against TAT-RasGAP<sub>317-326</sub> appears after selection with subinhibitory concentrations of peptide.** The indicated strains were incubated in presence or absence of 0.5 MIC of TAT-RasGAP<sub>317-326</sub>. Cultures were then diluted each day in medium containing either the same concentration of the peptide or double the concentration. Once bacterial growth was detected in the culture exposed to an elevated concentration of the peptide, the process was repeated thereby exposing the bacterial culture to sequentially increasing concentrations of peptide for a total of 20 passages. MIC of each passage was then measured and is presented as a fold change compared to the MIC of the original strain.
