1 **Bacterial surface properties influence the activity of the TAT-**  
2 **RasGAP<sub>317-326</sub> antimicrobial peptide**

3

4

5 Maria Georgieva<sup>2,&</sup>, Tytti Heinonen<sup>1,&</sup>, Alessandra Vitale<sup>3</sup>, Simone Hargraves<sup>1</sup>, Senka

6 Causevic<sup>1</sup>, Trestan Pillonel<sup>1</sup>, Leo Eberl<sup>3</sup>, Christian Widmann<sup>2,#</sup>, Nicolas Jacquier<sup>1,#,\*</sup>

7

8 1. Institute of Microbiology, Lausanne University Hospital and University of

9 Lausanne, Lausanne, 1011, Switzerland

10 2. Department of Biomedical Sciences, University of Lausanne, Lausanne, 1011,

11 Switzerland

12 3. Department of Plant and Microbial Biology, University of Zurich, Zurich, 8008,

13 Switzerland

14

15 & These authors contributed equally to this work

16 # These authors share senior authorship

17 Running title: Study of TAT-RasGAP<sub>317-326</sub> antimicrobial activity

18

19 Keywords: Antimicrobial peptide, anticancer peptide, antibiotic resistance, TAT-RasGAP<sub>317-</sub>

20 <sub>326</sub>, *Escherichia coli*, *Pseudomonas aeruginosa*

21

22

23 \*Corresponding author:

24 Dr. Nicolas Jacquier, Institute of Microbiology, Department of Pathology and Laboratory

25 Medicine, CHUV, Bugnon 48, CH-1011 Lausanne, Switzerland

26 Phone: +41213148539 ; Fax: +41213144060 ; Email : [nicolas.jacquier@chuv.ch](mailto:nicolas.jacquier@chuv.ch)

27 **Abstract**

28       Antibiotic resistance is an increasing threat for public health, underscoring the need for  
29 new antibacterial agents. Antimicrobial peptides (AMPs) represent an alternative to classical  
30 antibiotics. TAT-RasGAP<sub>317-326</sub> is a recently described AMP effective against a broad range of  
31 bacteria, but little is known about the conditions that may influence its activity. Using RNA-  
32 sequencing and screening of mutant libraries, we show that *Escherichia coli* and  
33 *Pseudomonas aeruginosa* respond to TAT-RasGAP<sub>317-326</sub> by regulating metabolic and stress  
34 response pathways, possibly implicating two-component systems. Our results also indicate  
35 that bacterial surface properties, in particular integrity of the lipopolysaccharide layer,  
36 influence peptide binding and entry. Finally, we found differences between bacterial species  
37 with respect to their rate of resistance emergence against this peptide. Our findings provide  
38 the basis for future investigation on the mode of action of this peptide and its potential clinical  
39 use as an antibacterial agent.

40

41

## 42 **Introduction**

43       The spread of antibiotic resistance in many bacterial species is severely limiting the  
44 benefits of antibiotics and a growing number of infections are becoming harder to treat (O'Neill,  
45 2016). Therefore, there is a need for new antimicrobials that could be used in the treatment of  
46 bacterial infections. Antimicrobial peptides (AMPs), several of which are already in clinical  
47 trials with promising results, represent a large source of antibacterial agents (Kumar et al.,  
48 2018). They are attractive alternatives to classical antibiotics due to their broad-spectrum  
49 activity that allows the targeting of a wide variety of bacterial species (Di Somma et al., 2020).  
50 In addition, AMPs have a relatively simple structure that can be bioengineered to increase, for  
51 example, their stability under physiological conditions or their resistance to degradation by  
52 gastrointestinal tract enzymes after oral administration (Kong et al., 2020).

53       AMPs were first described as naturally occurring peptides produced by many different  
54 organisms. Thousands have been identified (Wang et al., 2016, Kumar et al., 2018). In  
55 bacteria, AMP-producing strains have an advantage over other strains or species during  
56 competitive colonization of ecological niches (Hassan et al., 2012). In multicellular organisms,  
57 AMPs such as the human cathelicidin LL-37 and the bovine bactenecin, are part of the innate  
58 immune system involved in the destruction of various microorganisms (Gennaro et al., 1989,  
59 Xhindoli et al., 2016).

60       Despite their diversity, AMPs share a number of common features: they are short peptides  
61 rich in cationic and hydrophobic amino acids and display an overall positive charge. To exert  
62 their biological activity, positively charged AMPs first interact with the negatively charged  
63 bacterial surface through electrostatic interactions (Brogden, 2005). This initial interaction with  
64 the bacterial surface is followed, for a majority of AMPs described up to date, by  
65 permeabilization and disruption of the membrane bilayer resulting in bacterial death. For  
66 example, this mechanism of killing has been demonstrated for melittin isolated from bee  
67 venom (Hong et al., 2019), human cathelicidin LL-37 (Mendez-Samperio, 2010), and  
68 polymyxin B derived from the Gram-positive bacterium *Bacillus polymyxa* (Srinivas and  
69 Rivard, 2017, Kumar et al., 2018).

70 TAT-RasGAP<sub>317-326</sub> is a recently identified antimicrobial peptide that kills both Gram-  
71 positive and Gram-negative bacteria and has antibiofilm activity *in vitro* (Heulot et al., 2017,  
72 Heinonen et al., 2021). This peptide is composed of a cell permeable moiety, the TAT HIV 48-  
73 57 sequence, and a 10 amino acid sequence derived from the Src homology 3 domain of p120  
74 RasGAP. TAT-RasGAP<sub>317-326</sub> was initially identified as an anticancer compound that sensitizes  
75 cancer cells to genotoxins (Michod et al., 2004, Michod et al., 2009) and to radiotherapy  
76 (Tsoutsou et al., 2017). This peptide also inhibits cell migration and invasion (Barras et al.,  
77 2014c) and possesses anti-metastatic activity *in vivo* (Barras et al., 2014b). It can also directly  
78 lyse a subset of cancer cells by targeting plasma membrane inner leaflet-enriched  
79 phospholipids (Serulla et al., 2020) in a manner that does not involve known programmed cell  
80 death pathways (Annibaldi et al., 2014, Heulot et al., 2016). We have previously shown that  
81 the tryptophan residue at position 317 of the TAT-RasGAP<sub>317-326</sub> peptide is essential for its  
82 activity against both eukaryotic and bacterial cells (Barras et al., 2014a, Heulot et al., 2017).  
83 Furthermore, we have reported that, despite its potent *in vitro* antimicrobial activity, TAT-  
84 RasGAP<sub>317-326</sub> showed limited protection in a mouse model of *Escherichia coli* (*E. coli*)-induced  
85 peritonitis (Heulot et al., 2017). Physiological factors may have contributed to the poor  
86 biodistribution and rapid clearance of TAT-RasGAP<sub>317-326</sub> and, subsequently, to its low efficacy  
87 in this setting (Michod et al., 2009).

88 In this study, we assessed TAT-RasGAP<sub>317-326</sub> activity under various experimental  
89 settings to better characterize the peptide activity as well as the bacterial response to peptide  
90 exposure. Our findings provide important initial insights into the activity of the TAT-RasGAP<sub>317-  
91 326</sub> peptide that will pave the way for further investigation on its antimicrobial properties.

92

## 93 Results

### 94 Divalent cations reduce TAT-RasGAP<sub>317-326</sub> surface binding and entry into bacteria

95 *P. aeruginosa* grown under low Mg<sup>2+</sup> conditions is resistant to EDTA, gentamicin and  
96 polymyxin B via a mechanism that involves outer membrane modifications (Macfarlane et al.,  
97 1999, McPhee et al., 2003, Olaitan et al., 2014). To assess whether the antimicrobial activity  
98 of TAT-RasGAP<sub>317-326</sub> is also affected by Mg<sup>2+</sup> levels, we assessed how Mg<sup>2+</sup> modulated its  
99 minimal inhibitory concentration (MIC) and concentration inhibiting growth by 50% (IC<sub>50</sub>) in  
100 three laboratory strains, *E. coli* MG1655, *E. coli* ATCC 25922, and *P. aeruginosa* PA14. The  
101 results of these experiments are summarized in Table 1 and shown in detail in Supplementary  
102 Figures 1–3. The MIC of TAT-RasGAP<sub>317-326</sub> in standard Luria-Bertani (LB) medium for *E. coli*  
103 and *P. aeruginosa* was determined to be 8 μM and 32 μM, respectively. There was a small  
104 difference in peptide MIC levels between LB and BM2 medium supplemented with 2 mM  
105 MgSO<sub>4</sub> (BM2 Mg<sup>high</sup>) for both *E. coli* and *P. aeruginosa*. However, these two bacterial species  
106 displayed an 8-fold decrease in MIC of TAT-RasGAP<sub>317-326</sub> in BM2 containing 20 μM MgSO<sub>4</sub>  
107 (BM2 Mg<sup>low</sup>) relative to 2 mM MgSO<sub>4</sub> (BM2 Mg<sup>high</sup>). Low magnesium in BM2 medium resulted  
108 in a 4-fold increase of MIC of polymyxin B in *P. aeruginosa* but had no impact in *E. coli*. Our  
109 results agree with earlier data that low Mg<sup>2+</sup> increases *P. aeruginosa* resistance to polymyxin  
110 B (Macfarlane et al., 1999, McPhee et al., 2003). Altogether these findings show that low Mg<sup>2+</sup>  
111 in culture medium renders bacterial cells more susceptible to TAT-RasGAP<sub>317-326</sub> but not to  
112 polymyxin B, suggesting that TAT-RasGAP<sub>317-326</sub> and polymyxin B attack bacterial cells  
113 through different mechanisms.

114 Because BM2 is a defined bacteriological medium, we also investigated whether Mg<sup>2+</sup>  
115 affects the sensitivity to TAT-RasGAP<sub>317-326</sub> in complex medium such as LB. We compared  
116 peptide MIC in LB and LB supplemented with 2 mM MgSO<sub>4</sub> (LB Mg<sup>high</sup>) and found that high  
117 Mg<sup>2+</sup> increased peptide MIC in both *E. coli* and *P. aeruginosa* (Table 1), consistent with the  
118 data obtained with these two bacterial strains in BM2 medium. Moreover, the ability of TAT-  
119 RasGAP<sub>317-326</sub> to hamper *E. coli* growth rate was clearly inhibited by 2 mM MgSO<sub>4</sub> (Fig. 1,  
120 panels A and B). Therefore, high Mg<sup>2+</sup> levels decreased bacterial sensitivity to TAT-

121 RasGAP<sub>317-326</sub> and this result was independent of the medium used. We also determined that  
122 the MIC of polymyxin B for *P. aeruginosa* decreased in the presence of high Mg<sup>2+</sup> in LB (Table  
123 1), which is in accordance with our data for *P. aeruginosa* in BM2 medium.

124 Would cations other than Mg<sup>2+</sup> also render bacteria less sensitive to TAT-RasGAP<sub>317-326</sub>?  
125 Addition of Fe<sup>2+</sup> and Ca<sup>2+</sup> in culture medium decreased the sensitivity of *E. coli* to peptide (Fig.  
126 1 panels C and D). We also found that high Mg<sup>2+</sup> concentrations decreased bacterial sensitivity  
127 to TAT-RasGAP<sub>317-326</sub> both in the context of sulfate and chloride counterions (Fig. 1 panels B  
128 and E). In contrast, ammonium sulfate did not affect bacterial susceptibility to TAT-RasGAP<sub>317-  
129 326</sub> (Fig. 1F). Collectively, these results indicate that the Fe<sup>2+</sup>, Ca<sup>2+</sup> and Mg<sup>2+</sup> divalent cations  
130 in culture medium both hamper the ability of TAT-RasGAP<sub>317-326</sub> to kill bacteria.

131 Since divalent cations are known to influence outer membrane characteristics, such as  
132 lipopolysaccharide (LPS) integrity (Hancock, 1997) we questioned whether TAT-RasGAP<sub>317-  
133 326</sub> binding and internalization were altered by these cations. Fe<sup>2+</sup>, and to a lower extent Ca<sup>2+</sup>  
134 and Mg<sup>2+</sup>, decreased the levels of FITC-labelled TAT-RasGAP<sub>317-326</sub> bound to the surface of  
135 *E. coli* as well as the amount of internalized peptide (Fig. 1G). However, we found that peptide  
136 binding and internalization were not affected by ammonium sulfate – a finding that is consistent  
137 with our data that ammonium sulfate does not impact peptide MIC (Fig. 1F). Altogether, this  
138 data suggests that divalent cations decrease bacterial sensitivity to TAT-RasGAP<sub>317-326</sub> peptide  
139 via a mechanism that restricts peptide binding and entry in bacteria.

140

#### 141 **TAT-RasGAP<sub>317-326</sub> is bactericidal against *E. coli* and *P. aeruginosa***

142 To determine the relationship between peptide exposure and the number of viable  
143 (culturable) bacteria, we performed colony formation unit (CFU) assays. For *E. coli* grown in  
144 LB, 10 μM of TAT-RasGAP<sub>317-326</sub> induced an initial 2- to 5- fold decrease in the number of  
145 surviving bacteria but there was no further decrease upon longer incubation times (Fig. 2A).  
146 A more pronounced decrease in bacterial viability was observed at peptide concentrations  
147 ≥ 15 μM, indicating that the peptide is bactericidal at these concentrations (Fig. 2A). Confocal

148 microscopy studies showed that *E. coli* accumulated TAT-RasGAP<sub>317-326</sub> intracellularly when  
149 exposed to a concentration leading to bacterial killing (Fig. 2E). Furthermore, peptide exposure  
150 at this concentration led to changes in bacterial morphology as seen by electron microscopy  
151 (Fig. 2F). For *P. aeruginosa* grown in BM2 Mg<sup>low</sup> medium, 0.5-2 μM TAT-RasGAP<sub>317-326</sub> had a  
152 small impact on bacterial growth relative to the no peptide control, while 5-10 μM strongly  
153 reduced bacterial numbers (Fig. 2B). In order to analyze the kinetics of peptide activity at early  
154 time points, we performed survival curves using 20 μM of TAT-RasGAP<sub>317-326</sub> peptide for *E.*  
155 *coli* and 10 μM for *P. aeruginosa*. These concentrations correspond to 2.5 times the MIC of  
156 TAT-RasGAP<sub>317-326</sub> (Table 1) and were shown to kill a majority of bacteria (Fig. 2A-B). We  
157 monitored bacterial killing for the first two hours of peptide exposure and compared bacterial  
158 killing by TAT-RasGAP<sub>317-326</sub> and polymyxin B, the latter also added at 2.5 times its MIC (2.5  
159 μg/ml for *E. coli* and 10 μg/ml for *P. aeruginosa*). Interestingly, TAT-RasGAP<sub>317-326</sub> displayed  
160 slow time-kill kinetics in comparison to polymyxin B against *E. coli* (Fig. 2C), suggesting that  
161 these two peptides have different killing mechanisms in this bacterial species. In *P. aeruginosa*  
162 however, the killing kinetics were similar between TAT-RasGAP<sub>317-326</sub> and polymyxin B (Fig.  
163 2D).

164

### 165 **TAT-RasGAP<sub>317-326</sub> alters the transcriptional landscape of *E. coli***

166 RNA sequencing analysis was performed to evaluate the impact of TAT-RasGAP<sub>317-326</sub> on  
167 *E. coli* transcriptome. For this, we used 10 μM of the peptide, a concentration that prevents *E.*  
168 *coli* proliferation but does not lead to a dramatic drop in bacterial numbers (Fig. 2A). Among  
169 the 4419 transcripts predicted from the *E. coli* MG1655 genome, 95.6% (n = 4223) were  
170 detected in at least one condition (Dataset 1). Figure 3A presents the fold change in gene  
171 expression between bacteria incubated with and without TAT-RasGAP<sub>317-326</sub> as well as the  
172 average level of expression for each gene. We excluded from our analysis genes whose  
173 expression was below the threshold set at 16 reads per kilobase of transcripts per million  
174 reads (RPKM). Overall, TAT-RasGAP<sub>317-326</sub> treatment affected the expression of 962 genes

175 (fold change > 4): 11.0% of total detected genes were upregulated (red dots in Fig. 3A) while  
176 11.8% were downregulated (blue dots in Fig. 3A). Detailed lists of upregulated and  
177 downregulated genes can be found in Supplementary Tables 1 and 2, respectively.

178 We assessed and validated twelve genes from the RNA-Seq data by qRT-PCR on RNA  
179 extracted under the same conditions as for the RNA-Seq analyses. Five of these (*lpxL*, *fabF*,  
180 *marA*, *entB*, and *fepA*, depicted in red in Fig. 3B) were reported by RNA-Seq as upregulated,  
181 five as downregulated (*bssR*, *frdA*, *ompF*, *nuoE*, and *sdhC*, depicted in blue in Fig. 3B) and  
182 two as unchanged according to the RNA-Seq analysis (*tolC* and *ompR*). One of the unchanged  
183 genes, *ompR*, was used as the housekeeping reference gene for normalization. We obtained  
184 good correlation between the fold changes obtained with RNA-Seq and with qRT-PCR,  
185 confirming the validity of the RNA-Seq data (Fig. 3B).

186 Using the gene expression profiles we obtained from RNA sequencing, we investigated  
187 which biological pathways were associated with the *E. coli* response upon exposure to TAT-  
188 RasGAP<sub>317-326</sub>. To accomplish this in a systematic manner, we performed Gene Ontology (GO)  
189 and Kyoto Encyclopedia of Genes and Genomes (KEGG) pathway enrichment analyses  
190 (Kanehisa and Goto, 2000, Kanehisa et al., 2019, Kanehisa, 2019, Ashburner et al., 2000,  
191 The Gene Ontology, 2019) on the subset of differentially expressed genes. The analysis of  
192 KEGG pathways revealed that several metabolic and information-processing pathways were  
193 enriched among differentially expressed genes (Fig. 3, panels C and D). For example, seven  
194 of the eight genes responsible for enterobactin synthesis in *E. coli* (included in “biosynthesis  
195 of siderophore group nonribosomal peptides” KEGG pathway) were upregulated upon peptide  
196 treatment. Other metabolic pathways such as carbon metabolism (citrate cycle, pyruvate  
197 metabolism) and oxidative phosphorylation were downregulated. Similarly, GO term analysis  
198 revealed that upregulated and downregulated genes in response to TAT-RasGAP<sub>317-326</sub> were  
199 enriched in biological processes related to general bacterial metabolism and stress response  
200 (Supplementary Fig. 4). From our data, we could not distinguish peptide-specific gene  
201 expression changes from gene expression changes mediating general bacterial adaptation to  
202 stress. To address this question, we decided to perform a screening of a comprehensive *E.*



203 *coli* deletion mutant library to determine which genes are directly involved in the bacterial  
204 response to TAT-RasGAP<sub>317-326</sub>.

205

206 **Screening of the Keio *E. coli* deletion mutant library uncovers genes that affect bacterial**  
207 **responses to TAT-RasGAP<sub>317-326</sub>**

208 The Keio collection of *E. coli* deletion mutants consists of single gene deletion clones for  
209 each non-essential gene in *E. coli* (Baba et al., 2006). To perform the screening of the  
210 collection, we exposed each Keio strain to 5  $\mu$ M TAT-RasGAP<sub>317-326</sub>, a non-bactericidal  
211 concentration of peptide (Fig. 2A) and monitored bacterial growth by OD<sub>590</sub> measurement at  
212 specific time points (detailed results of growth measurements for all individual mutants are  
213 available in Dataset 2). For each strain, we determined the relative growth of the deletion strain  
214 compared to the wild-type strain when incubated with TAT-RasGAP<sub>317-326</sub> for 6 hours and 24  
215 hours (Fig. 4, panels A and B). We identified 27 strains showing decreased sensitivity to the  
216 peptide, thus having a normalized growth at 6 hours higher than the average of 270 replicates  
217 of the parental strain + 2 times the standard deviation (Fig. 4A and Supplementary Table 3).  
218 Furthermore, we identified 356 hypersensitive strains (having deletions in 279 different genes)  
219 that showed a normalized growth at 24 hours lower than average of the parental strain – 3  
220 times the standard deviation (Fig. 4B). While the wild-type strains grew more slowly in the  
221 presence than in the absence of TAT-RasGAP<sub>317-326</sub>, strains showing decreased sensitivity to  
222 the peptide grew similarly in both conditions and hypersensitive strains showed no detectable  
223 growth in the presence of the peptide (Fig. 4C). It has to be mentioned that Keio collection is  
224 composed of two independent deletion mutants for each gene. We could not observe  
225 decreased sensitivity, as defined by our criteria, in both strains having the same gene deleted  
226 (Supplementary Table 3). However, some decreased sensitivity, approaching the threshold,  
227 could be observed in the second strain for a few genes such as *crr* and *rfaY*, for example. The  
228 *crr* gene product is involved in glucose uptake and phosphorylation, and in carbon metabolism  
229 regulation (Deutscher et al., 2006). The *rfaY* gene product is part of the LPS biogenesis

230 pathway (Yethon et al., 1998). Interestingly, inactivation of *rfaY* by transposon mutagenesis  
231 was shown to affect *E. coli* susceptibility to another AMP, LL-37 (Bociek et al., 2015).

232 On the other hand, 77 gene deletions caused hypersensitivity for both replicates present  
233 in the Keio collection (Supplementary Table 4). KEGG pathway and GO term analyses were  
234 thus performed on genes for which both deletion mutants showed hypersensitivity. The results  
235 of this analysis indicate that deletion of genes involved in bacterial metabolism and two  
236 component systems were associated with TAT-RasGAP<sub>317-326</sub> bacterial sensitivity (Fig. 4D-E,  
237 Table 2).

238 Of interest, we found that a subset of less and more sensitive Keio strains were deletion  
239 mutants in LPS biogenesis genes. We confirmed differences in sensitivity for  $\Delta rfaY$  and  $\Delta lpxL$   
240 deletion mutants by measuring MIC and IC<sub>50</sub> of TAT-RasGAP<sub>317-326</sub> on these mutants and  
241 could confirm that deletion of *rfaY* caused a decreased sensitivity and deletion of *lpxL* an  
242 increased sensitivity to the peptide (Fig. 5A). This raises the possibility that TAT-RasGAP<sub>317-</sub>  
243 <sub>326</sub> directly interacts with bacterial LPS. In such a case, soluble LPS should compete with the  
244 peptide for binding to bacterial cells and reduce peptide efficacy, an effect that has been  
245 reported for polymyxin B (Domingues et al., 2012). Figure 5B shows indeed that soluble LPS  
246 greatly diminishes the efficacy of polymyxin B but has no impact on the sensitivity of *E. coli*  
247 towards TAT-RasGAP<sub>317-326</sub>. The potential role played by genes involved in LPS synthesis in  
248 TAT-RasGAP<sub>317-326</sub> sensitivity remains therefore to be uncovered.

249 We further investigated whether LPS integrity was required for survival of *E. coli* in the  
250 presence of TAT-RasGAP<sub>317-326</sub>. For this purpose, we used EDTA to destabilize the LPS  
251 structure (Hancock, 1984) and measured how this impacted the MIC of TAT-RasGAP<sub>317-326</sub>  
252 and polymyxin B on two *E. coli* strains lacking (the MG1655 strain) or not (the ATCC 25922  
253 strain) O-antigen moieties (Eder et al., 2009). EDTA, at concentrations that do not affect  
254 bacterial proliferation (Supplementary Fig. 5), sensitized both strains to TAT-RasGAP<sub>317-326</sub>  
255 (Figure 6B-C), suggesting that compromised LPS integrity favors the antimicrobial activity of  
256 the peptide. Polymyxin B sensitivity was less affected by EDTA, indicating again that

257 polymyxin B and TAT-RasGAP<sub>317-326</sub> use different mechanisms to inhibit bacterial growth or  
258 survival.

259

## 260 **Transposon screening in *P. aeruginosa***

261 Since TAT-RasGAP<sub>317-326</sub> is active against both *E. coli* and *P. aeruginosa*, we investigated  
262 whether some of the pathways that play a role in peptide resistance are shared between the  
263 two bacterial species. We thus exposed a *P. aeruginosa* transposon mutant library (Vitale et  
264 al., 2020) to 0.5  $\mu$ M TAT-RasGAP<sub>317-326</sub> for 12 generations and performed deep sequencing.  
265 This allowed us to compare level of transposons in different genes between a bacterial  
266 population treated with the peptide and another that was not. Prevalence of strains having a  
267 disruption of a gene required for growth in presence of the peptide would decrease compared  
268 to strains having integrated the transposon in an unrelated region (detailed results of this deep  
269 sequencing are presented as Dataset 3). We thus defined lower prevalence of transposon  
270 insertion as a read-out of hypersensitivity to TAT-RasGAP<sub>317-326</sub>. By this way, we identified 75  
271 genes, for which prevalence of disruption via transposon insertion decreased in presence of  
272 the peptide (Supplementary Table 5). Interestingly, 26 of these (35%) are associated with  
273 hypersensitivity to other antimicrobial peptides (Vitale et al., 2020). Some of these genes code  
274 for LPS modifying enzymes such as ArnA, ArnB and ArnT, and for two-component regulators  
275 such as ParS and ParR that are involved in the regulation of LPS modifications (Fernandez et  
276 al., 2010). Among the genes, for which prevalence of transposon insertion was decreased in  
277 presence of TAT-RasGAP<sub>317-326</sub> but not with other AMPs, we identified *algJ*, *algK* and *algX*,  
278 genes of the biosynthesis pathway of the extracellular polysaccharide alginate. We also  
279 observed that mutants in genes coding for the RND efflux transporter MdtABC and CusC, a  
280 component of the trans-periplasmic Cu<sup>2+</sup> transporter CusCFBA, are potentially associated with  
281 hypersensitivity to TAT-RasGAP<sub>317-326</sub>. Other pathways that seem to be important for TAT-  
282 RasGAP<sub>317-326</sub> resistance are related to carbon metabolism, redox reactions and translation  
283 regulation (Supplementary Table 5).

284 We next compared the lists of potential hypersensitive strains found in screenings in *E.*  
285 *coli* and in *P. aeruginosa*. We identified six gene orthologues, whose disruption is associated  
286 with hypersensitivity to the TAT-RasGAP<sub>317-326</sub> peptide in both *E. coli* and *P. aeruginosa* (Table  
287 3). Among them, four are coding for two-component system proteins: *parR* and *parS* (*rtsA* and  
288 *rstB* in *E. coli*), *phoP*, and *pmrB* (*qseC* in *E. coli*). These four mutants were associated with  
289 hypersensitivity to polymyxin B in *P. aeruginosa* (Vitale et al., 2020), indicating that these  
290 regulatory pathways may be required for a general adaptation to AMPs. This is of interest,  
291 since RstAB system is regulated by PhoQP system in *E. coli* (Ogasawara et al., 2007) and  
292 PhoQP system was shown to be involved in resistance to AMPs (Yadavalli et al., 2016). Two  
293 other genes conserved between *P. aeruginosa* and *E. coli* are associated specifically with  
294 hypersensitivity to TAT-RasGAP<sub>317-326</sub>. One is a transcriptional regulator and the other is  
295 involved in LPS biosynthesis, further highlighting a potential role for cell surface composition  
296 in the sensitivity of bacteria towards TAT-RasGAP<sub>317-326</sub> (Table 3).

297

### 298 **Effect of combining TAT-RasGAP<sub>317-326</sub> with other AMPs**

299 To determine whether TAT-RasGAP<sub>317-326</sub> activity is affected by other AMPs, we  
300 performed growth tests of *E. coli* in presence of different combinations of TAT-RasGAP<sub>317-326</sub>,  
301 melittin, LL-37 and polymyxin B. Concentrations were chosen so that a clear difference in  
302 growth was observed when “half” concentrations were used (Supplementary Fig. 6A) as  
303 compared with “full” concentrations, that correspond to the double of “half” concentrations  
304 (Supplementary Fig. 6B). The effect of combining pairs of AMPs using “half” concentrations is  
305 shown in Supplementary Fig. 6C as percentage of growth compared to an untreated control.  
306 We did not observe an increase in the effect of TAT-RasGAP<sub>317-326</sub> when combined with the  
307 three other AMPs. However, the combination of melittin and polymyxin B (2.7% of growth) and  
308 the combination of LL-37 and polymyxin B (0.6% of growth) showed increased activity.  
309 Notably, the combination of melittin and polymyxin B caused stronger growth inhibition (>95%)  
310 than obtained by either compound at the “full” concentration (~20% and ~35% growth inhibition  
311 for melittin and polymyxin B, respectively; Supplementary Fig. 6C). This observation is

312 consistent with previous reports of the synergism between melittin and antibiotics such as  
313 doripenem and ceftazidime (Akbari et al., 2019). In contrast, we observed an apparent lower  
314 effect of TAT-RasGAP<sub>317-326</sub> in presence of melittin (Supplementary Fig. 6C). Since this effect  
315 was very weak in these conditions, we combined the “half” concentration of melittin with the  
316 “full” concentration of TAT-RasGAP<sub>317-326</sub> and could observe a clear inhibition of the  
317 antimicrobial activity of this peptide by melittin (Fig. 6A). To better understand the mechanism  
318 behind this observation, we assessed peptide binding and entry into bacteria using a  
319 fluorescently labelled version of TAT-RasGAP<sub>317-326</sub> peptide. We found that, in the presence  
320 of melittin, binding of FITC-labelled TAT-RasGAP<sub>317-326</sub> to *E. coli* bacteria was not decreased,  
321 but apparently slightly increased when compared to the control condition where bacteria were  
322 incubated with FITC-labelled TAT-RasGAP<sub>317-326</sub> alone. However, we observed an apparent  
323 lower intracellular accumulation of the labelled version of TAT-RasGAP<sub>317-326</sub> peptide in  
324 presence of melittin (Fig. 6B).

325

### 326 ***In vitro* selection of resistant bacteria to TAT-RasGAP<sub>317-326</sub> peptide**

327 AMPs are less susceptible to bacterial resistance evolution than classical antibiotics  
328 (Lazar et al., 2018, Spohn et al., 2019, Lazzaro et al., 2020). To measure the propensity of  
329 bacteria to develop resistance against TAT-RasGAP<sub>317-326</sub>, we serially passaged several  
330 bacterial strains (*E. coli*, *P. aeruginosa*, *S. aureus* and *S. capitis*) in the presence of TAT-  
331 RasGAP<sub>317-326</sub> peptide and recorded the number of passages required to detect the  
332 appearance of resistant mutants in each strain. First, we grew the parental bacterial strains  
333 overnight in presence of sub-inhibitory concentrations of the peptide. We then diluted this  
334 parent culture into two subcultures, one of which was exposed to an increased concentration  
335 of the TAT-RasGAP<sub>317-326</sub> peptide while the other was kept in the same concentration of  
336 peptide as the parent culture. Once bacterial growth was detected in the culture exposed to  
337 an elevated concentration of the peptide, the process was repeated, thereby exposing the  
338 bacterial culture to sequentially increasing concentrations of peptide for a total of 20 passages.  
339 For each passage, we measured the corresponding MIC (Fig. 7A). Using this approach, we

340 obtained strains with highly increased MICs (16-32 fold) for *E. coli*, *S. capitis*, but only a faint  
341 increase (2-4 fold) for *P. aeruginosa* (Fig. 7A, Table 4 and Supplementary Tables 6-8). It  
342 should be noted that the parental strain of *S. aureus* has a peptide MIC in the range 64-128  
343  $\mu\text{M}$  and this MIC rapidly increased to 256  $\mu\text{M}$  (Supplementary Table 9). We did not expose  
344 bacteria to higher concentrations, as the peptide started to precipitate in these conditions. To  
345 test whether the strains recovered at passage 20 for *E. coli*, *P. aeruginosa* and *S. capitis* and  
346 passage 12 for *S. aureus* showed increased resistance to other AMPs as well, we determined  
347 the fold change of the MICs for polymyxin B, melittin and LL-37 relative to the corresponding  
348 parental strains that did not undergo selection (Table 4). Interestingly, peptide-resistant *E. coli*  
349 (gram-negative) did not show increased MICs to the other AMPs we tested as compared to  
350 the parental strain. In contrast, *P. aeruginosa* and the Gram-positive *S. aureus* and *S. capitis*  
351 selected for resistance to TAT-RasGAP<sub>317-326</sub> showed increased MIC towards other AMPs  
352 (Table 4). Thus, our findings suggest that bacterial species differ in their tendency to develop  
353 cross-resistance to TAT-RasGAP<sub>317-326</sub> peptide and other AMPs.

354 Finally, we sought to investigate whether the peptide-resistant bacteria we obtained in our  
355 selection process remain targets for alternative treatments such as combination therapy with  
356 other antimicrobial agents. In particular, we tested whether EDTA, an agent known to enhance  
357 the efficacy of antimicrobials via a mechanism that weakens the outer cell wall of bacteria,  
358 could potentiate the effect of TAT-RasGAP<sub>317-326</sub> against peptide-resistant *E. coli* (Leive,  
359 1965). Importantly, the presence of EDTA alone at the concentrations tested was not  
360 associated with any significant change in bacterial numbers (Supplementary Figure 5).  
361 However, EDTA in combination with TAT-RasGAP<sub>317-326</sub> (Fig. 7B) potentiated the ability of the  
362 peptide against the peptide-resistant *E. coli* strain. Our findings suggest that peptide-  
363 resistance remains treatable in combination therapy with other antimicrobial agents.

364

## 365 Discussion

366 The activity of antimicrobial peptides can be affected by environmental factors, but we  
367 lack knowledge about how extracellular factors impact TAT-RasGAP<sub>317-326</sub> activity. Here, we  
368 report that addition of divalent cations in LB medium resulted in decreased bacterial sensitivity  
369 to TAT-RasGAP<sub>317-326</sub> peptide and reduced peptide binding and entry. The mechanism  
370 contributing to lower peptide binding might be due to competition between divalent ions in the  
371 culture medium and the cationic TAT-RasGAP<sub>317-326</sub> peptide for binding to bacterial surface  
372 (Fig. 9). Alternatively, divalent cations, which are important for membrane stability, may  
373 influence binding and entry of TAT-RasGAP<sub>317-326</sub> (Clifton et al., 2015).

374 RNA sequencing showed that genes involved in carbon metabolism were  
375 downregulated upon treatment with TAT-RasGAP<sub>317-326</sub> (Fig. 3). Moreover, deletion or  
376 transposon mutants of genes involved in carbon metabolism and ATP production were more  
377 sensitive towards TAT-RasGAP<sub>317-326</sub> (Fig. 4 and Table 3), indicating that energy production  
378 pathways may be important for resistance towards this peptide. Adaptation to environmental  
379 stimuli might also be of importance for survival to TAT-RasGAP<sub>317-326</sub>, since mutants lacking  
380 genes coding for some two-component systems show increased sensitivity towards TAT-  
381 RasGAP<sub>317-326</sub> (Table 2). Several of these two-component systems are known to play role in  
382 resistance to antibiotics or AMPs, such as PhoPQ, whose importance in response to AMPs is  
383 well described (Bader et al., 2005, Yadavalli et al., 2016). This further highlights the  
384 importance of two-component systems for adaptability and survival of bacteria in harsh  
385 conditions.

386 Another pathway that may be involved in sensitivity to TAT-RasGAP<sub>317-326</sub> is the LPS  
387 biosynthesis pathway. We found that some mutations affecting this pathway cause either  
388 moderate resistance or hypersensitivity to the peptide (Fig. 5A). We could further confirm the  
389 importance of LPS integrity for survival to TAT-RasGAP<sub>317-326</sub> using EDTA that destabilizes  
390 LPS. This is consistent with the protective effect of divalent cations (Fig. 1), which can bind  
391 and stabilize LPS (Pelletier et al., 1994). Importance of bacterial surface composition in  
392 sensitivity towards TAT-RasGAP<sub>317-326</sub> is further highlighted by the fact that *P. aeruginosa*

393 transposon mutants affecting the alginate biosynthesis pathway are more sensitive to TAT-  
394 RasGAP<sub>317-326</sub> than the control strain (Supplementary Table 5). Alginate is an anionic  
395 extracellular polysaccharide that is involved in virulence, antimicrobial resistance and biofilm  
396 formation in *P. aeruginosa* (Franklin et al., 2011).

397 Interestingly, screening of the Keio deletion collection did not allow to unearth mutants  
398 showing complete resistance towards TAT-RasGAP<sub>317-326</sub>. This indicates that resistance may  
399 not be obtained by the loss of function of one gene. Resistance towards TAT-RasGAP<sub>317-326</sub>  
400 that we obtained by selection (Fig. 7A) may thus have acquired point mutations that modulate  
401 activity through activation of some pathways or modifications of essential components. This  
402 needs now further investigations in order to describe mechanisms of resistance towards TAT-  
403 RasGAP<sub>317-326</sub> in particular and AMPs in general.

404 On the other hand, Keio collection screening highlighted pathways that are apparently  
405 required for *E. coli* to respond to TAT-RasGAP<sub>317-326</sub>. Whether these pathways are specifically  
406 required for response to TAT-RasGAP<sub>317-326</sub> or play a role in a general response to AMPs  
407 needs further investigation. Interestingly, we observed, using a *P. aeruginosa* transposon  
408 mutants library, that 21% (16 out of 75) of the genes which mutation was association with  
409 hypersensitivity to TAT-RasGAP<sub>317-326</sub> were associated with hypersensitivity towards other  
410 AMPs (Supplementary Table 5)(Vitale et al., 2020).

411 Combinatorial therapies are gaining interest in the treatment of multi-resistant bacteria  
412 (Leon-Buitimea et al., 2020). We thus investigated whether combination with other AMPs  
413 might influence the activity of TAT-RasGAP<sub>317-326</sub>. In general, activity of TAT-RasGAP<sub>317-326</sub>  
414 was not influenced by other AMPs. However, melittin had an inhibitory effect on TAT-  
415 RasGAP<sub>317-326</sub> activity, affecting its entry in bacteria (Fig. 6). This rather peculiar effect might  
416 be explained by the hypothesized mode of action of melittin (i.e. carpet model), in which  
417 melittin first interacts with the bacterial surface, before reaching a concentration threshold that  
418 leads to the disruption of the bacterial membrane (Lee et al., 2013). Sub-inhibitory  
419 concentrations of melittin might thus block binding of TAT-RasGAP<sub>317-326</sub> to the bacterial  
420 membrane.



421 Finally, we investigated the potency of bacteria to develop resistance towards TAT-  
422 RasGAP<sub>317-326</sub>. Resistance could be obtained upon passages in sub-inhibitory concentrations  
423 of the peptide (Fig. 7A), but bacterial strains differed with respect to the rate of resistance  
424 emergence. Interestingly, peptide-resistant *E. coli* remains treatable by peptide in combination  
425 with EDTA, a chemical agent that compromises the integrity of the bacterial outer membrane.  
426 Future work should examine the mechanism of *E. coli* resistance to peptide and will help  
427 elucidate how EDTA, which targets the bacterial envelope, helps potentiate peptide activity in  
428 resistant backgrounds. Overall, our data highlight the potential benefit of combination  
429 therapies, which might not only prevent the development of such resistance, but also  
430 potentiate treatment of resistant strains, as shown here by EDTA in combination with TAT-  
431 RasGAP<sub>317-326</sub>.

432 The schemes presented in Figure 8 highlight the factors that may influence TAT-  
433 RasGAP<sub>317-326</sub> activity and present hypotheses about underlying mechanisms. The positively  
434 charged TAT-RasGAP<sub>317-326</sub> peptide interacts with the negative surface charges of the  
435 bacterial membrane, allowing its binding and entry in the bacterial cell (Fig. 8A). Presence of  
436 divalent cations in the culture medium compete with TAT-RasGAP<sub>317-326</sub> peptide for binding to  
437 the negative charges on LPS, lowering the activity of the peptide. Similarly, modifications of  
438 LPS structure can also lower interaction between TAT-RasGAP<sub>317-326</sub> and bacterial surface.  
439 We hypothesize this lower activity to be due to a decrease of the net charge of bacterial  
440 surface, causing a lower affinity of the peptide to bacteria (Fig. 8B). In contrast, destabilization  
441 of LPS by EDTA or by deletion of genes involved in biosynthesis of LPS precursors increases  
442 the bactericidal activity of TAT-RasGAP<sub>317-326</sub>. This is possibly due to a defect of the integrity  
443 of the bacterial envelope, decreasing bacterial defenses towards TAT-RasGAP<sub>317-326</sub>. (Fig.  
444 8C).

445 In summary, the results presented in this article bring a better understanding of the  
446 factors that influence the antimicrobial activity of TAT-RasGAP<sub>317-326</sub>. We describe the  
447 importance of bacterial envelope integrity on the sensitivity towards TAT-RasGAP<sub>317-326</sub>.  
448 Factors such as divalent salts, EDTA and LPS structure influence the concentration of peptide

449 needed to inhibit bacterial growth. Furthermore, we report the effect of TAT-RasGAP<sub>317-326</sub> on  
450 the transcriptional landscape of *E. coli* and highlight the importance of a broad range of two-  
451 component systems in the adaptation of bacteria towards this AMP. We finally investigated  
452 the effect of other AMPs on the activity of TAT-RasGAP<sub>317-326</sub> and could select TAT-  
453 RasGAP<sub>317-326</sub>-resistant bacteria. Our observation that sensitivity could be increased and  
454 resistance could be reversed by addition of EDTA is important in the perspective of a clinical  
455 use of this peptide to improve its efficiency and to prevent rapid emergence of resistance.

456

### 457 **Limitations of the study**

458 Results presented in this study originate from *in vitro* studies. They might thus only be partially  
459 representative of which interactions would happen in an *in vivo* model of infection. Indeed,  
460 several factors such as presence of endogenous AMPs, as well as proteins or other  
461 components with which TAT-RasGAP<sub>317-326</sub> may interact are not present in our system.  
462 Moreover, interactions between TAT-RasGAP<sub>317-326</sub> and other AMPs need to be investigated  
463 in further details using checkerboard assays, in order to determine putative synergisms.  
464 Similarly, mechanisms of action of the peptide and mechanisms of resistance towards the  
465 peptide that were selected need to be further investigated in the future, in order to describe  
466 how TAT-RasGAP<sub>317-326</sub> interacts with bacteria at the molecular level.

467

### 468 **Acknowledgments**

469 We would like to thank Sébastien Aeby and Yasmina Merzouk for technical support, Valentin  
470 Scherz for support in bioinformatics analyses and Prof. Gilbert Greub for sharing equipment  
471 and laboratories. This study was supported by an interdisciplinary grant of the Faculty of  
472 Biology and Medicine of the University of Lausanne.

### 473 **Author contributions**

474 MG, TH, NJ, AV, SH and SC performed experiments. MG, TH, LE, CW and NJ were involved  
475 in the planning of the project and discussed the results. MG, TH, NJ and TP analysed the  
476 results. MG, CW and NJ wrote the manuscript. All the authors proofread the manuscript.

477

#### 478 **Declaration of interest**

479 The authors declare no competing interests.

480

#### 481 **Figure legends:**

482 **Figure 1. Divalent cations affect bacterial sensitivity towards TAT-RasGAP<sub>317-326</sub> and**  
483 **decrease binding and entry of the peptide in *E. coli*. (A-F)** *E. coli* MG1655 were grown  
484 overnight at 37°C in LB supplemented with 2 mM of the indicated salt and diluted to OD<sub>600</sub> =  
485 0.1. Bacterial suspension was then grown 1 hour at 37°C before addition of the indicated  
486 concentrations of TAT-RasGAP<sub>317-326</sub>. OD<sub>600</sub> was measured at the indicated times after the  
487 initial dilution. The results correspond to the mean ± the range of two independent  
488 experiments. **(G)** *E. coli* MG1655 were grown overnight at 37°C in LB containing 2 mM of the  
489 indicated salts and diluted to OD<sub>600</sub> = 0.1. Bacterial binding and uptake of 10 µM FITC-labelled  
490 TAT-RasGAP<sub>317-326</sub> was recorded in triplicate (each shown with a different color on the graph)  
491 via flow cytometry with (Intracellular) or without (Total) quenching with 0.2 % trypan blue. P  
492 values were calculated by ratio paired t-test between the indicated condition and the LB  
493 control.

494

495 **Figure 2. TAT-RasGAP<sub>317-326</sub> is bactericidal against *E. coli* and *P. aeruginosa*. (A-B)**  
496 Overnight cultures of *E. coli* MG1655 in LB (A) and *P. aeruginosa* PA14 in BM2 Mg<sup>low</sup> (B) were  
497 diluted to OD<sub>600</sub> = 0.1 and incubated at 37°C for 1 hour. TAT-RasGAP<sub>317-326</sub> was then added  
498 at the indicated concentrations. Samples were taken at the indicated time points, serially  
499 diluted 10-fold in fresh LB and plated on LB agar plates. Number of colony forming units per  
500 ml (CFU/ml) in the original culture was calculated. **(C)** *E. coli* cultures were treated as in (A).  
501 TAT-RasGAP<sub>317-326</sub> (20 µM) or polymyxin B (2.5 µg/ml) were added as indicated. Samples  
502 were taken at the indicated time points and CFU/ml were determined as in (A). **(D)** *P.*  
503 *aeruginosa* cultures were treated as in (B). TAT-RasGAP<sub>317-326</sub> (10 µM) or polymyxin B (10  
504 µg/ml) were added as indicated. Samples were taken at the indicated time points and CFU/ml  
505 were determined as in (A). Panels A-D: the results correspond to the mean ± standard  
506 deviation from at least two independent experiments. **(E)** *E. coli* MG1655 grown overnight and

507 diluted to  $OD_{600} = 0.1$  were incubated for 1 hour with or without 20  $\mu\text{M}$  FITC-labelled TAT-  
508 RasGAP<sub>317-326</sub> (green). The bacteria were then labelled with 5  $\mu\text{g/ml}$  FM4-64 (red) and fixed  
509 with 4% paraformaldehyde. Incubation with DAPI (blue) was subsequently performed.  
510 Pictures were taken with a Zeiss LSM710 confocal microscope and analyzed using ImageJ  
511 software. Bar = 2  $\mu\text{m}$ . **(F)** *E. coli* bacteria treated for 1 hour with 20  $\mu\text{M}$  TAT-RasGAP<sub>317-326</sub>  
512 were fixed with glutaraldehyde and prepared for electron microscopy as described in Material  
513 and Methods section. Samples were imaged via transmission electron microscopy. Images  
514 were analyzed using ImageJ software. Bar = 2  $\mu\text{m}$ .

515

516 **Figure 3. TAT-RasGAP<sub>317-326</sub> alters the transcriptional landscape of *E. coli*.** RNA-seq  
517 analysis was performed on *E. coli* MG1655 incubated for 1 hour with or without 10  $\mu\text{M}$  TAT-  
518 RasGAP<sub>317-326</sub>. **(A)** MA-plot of the average gene expression (x-axis, RPKM: read per kilobase  
519 million) vs the differential expression (y-axis). Threshold for gene expression is indicated with  
520 the blue vertical line. The red lines indicate the cut-off limit for upregulated (red dots) and  
521 downregulated (blue dots) genes. **(B)** Correlation between RNA-seq ( $\log_2$  Fold Change) and  
522 qRT-PCR ( $\log_2$  Relative Quantification) differential expression performed on RNA extracted  
523 from *E. coli* treated for one hour with or without 10  $\mu\text{M}$  TAT-RasGAP<sub>317-326</sub> for a set of genes  
524 detected by RNA-seq as downregulated by the peptide (blue), not changed (grey) or  
525 upregulated (red). Gene expression was measured in duplicates on two independent  
526 extracted RNA sets. **(C-D)** Fraction of KEGG pathway genes that are upregulated **(C)** or  
527 downregulated **(D)** after treatment with TAT-RasGAP<sub>317-326</sub>. Dot size indicates the number of  
528 genes in the selection.

529

530 **Figure 4. Selection of hypersensitive and resistant *E. coli* deletion mutants from the**  
531 **KEIO collection.** Deletion mutants and the corresponding wild-type strain were grown in LB  
532 medium with or without 5  $\mu\text{M}$  TAT-RasGAP<sub>317-326</sub>.  $OD_{590}$  was measured at 0, 1.5, 3, 6, and 24  
533 hours. **(A-B)** Distribution of the normalized growth (NG; see the methods for the calculation of  
534 NG) of bacteria incubated with TAT-RasGAP<sub>317-326</sub> at 6 hours **(A)** and 24 hours **(B)**. The mean  
535 NG of the wild-type strain (mean WT) is indicated with a vertical solid line. Strains with  $NG_{6 \text{ hours}} > [\text{mean WT} + 2 \text{ standard deviations (SDs)}]$  and with  $NG_{24 \text{ hours}} < [\text{mean WT} - 3 \text{ SDs}]$  are  
536 defined here as resistant and hypersensitive strains, respectively. **(C)** Growth curves of wild-  
537 type (n=270), hypersensitive (n=356), and resistant (n=20) mutants in presence or absence  
538 of 5  $\mu\text{M}$  TAT-RasGAP<sub>317-326</sub>. Data are mean  $\pm$  SD. **(D)** Top 10 most represented KEGG  
539 pathways among hypersensitive strains. The number of hypersensitive strains in each  
540 pathway was normalized to the number of KEIO collection strains in the corresponding  
541

542 pathway. **(E)** Biological processes GO term enrichment analysis with the 10 most represented  
543 terms among the hypersensitive strains.

544

545 **Figure 5. Changes in LPS integrity influence TAT-RasGAP<sub>317-326</sub> activity. (A)** Deletion of  
546 LPS biosynthesis genes have diverse effect on TAT-RasGAP<sub>317-326</sub> activity. MICs and IC<sub>50</sub> of  
547 TAT-RasGAP<sub>317-326</sub> against wild-type strain or the two deletion mutants *DrfaY* resp. *DlpxL*  
548 from the Keio deletion library were measured as previously described. **(B-D)** LPS  
549 supplementation or EDTA differentially influence activity of TAT-RasGAP<sub>317-326</sub> and polymyxin  
550 B. MICs of TAT-RasGAP<sub>317-326</sub> and polymyxin B on *E. coli* MG1655 (A-B) or ATCC25922 (C)  
551 were measured as previously described in LB containing the indicated concentrations of  
552 purified LPS or EDTA. Data are averages of two independent experiments.

553

554 **Figure 6. Melittin has an inhibitory effect on TAT-RasGAP<sub>317-326</sub> activity. (A)** Sub-inhibitory  
555 concentrations of melittin interfere with TAT-RasGAP<sub>317-326</sub> activity. Indicated concentrations  
556 of AMPs were added and OD<sub>600</sub> was measured as previously described. Average and range  
557 of two independent experiments are shown. **(B)** *E. coli* MG1655 was grown overnight at 37°C,  
558 diluted to OD<sub>600</sub> = 0.1 and grown during 1 hour before addition or not of 10 µM FITC-labelled  
559 TAT-RasGAP<sub>317-326</sub> with or without 64 µg/ml melittin. Cells were incubated for 1 hour at 37°C,  
560 extracellular fluorescence was quenched (Intracellular) or not (Total) using 0.2% trypan blue  
561 before sample acquisition. Mean fluorescence intensities (MFI) were measured for triplicates  
562 (shown with different colors). P values were calculated using ratio paired t-test between the  
563 indicated conditions.

564

565 **Figure 7. Bacterial resistance against TAT-RasGAP<sub>317-326</sub> appears after selection with**  
566 **sub-inhibitory concentrations of peptide. (A)** The indicated strains were incubated in  
567 presence or absence of 0.5 MIC of TAT-RasGAP<sub>317-326</sub>. Cultures were then diluted each day  
568 in medium containing either the same concentration of the peptide or twice the concentration.  
569 Once bacterial growth was detected in the culture exposed to an elevated concentration of the  
570 peptide, the process was repeated thereby exposing the bacterial culture to sequentially  
571 increasing concentrations of peptide for a total of 20 passages. MIC of each passage was then  
572 measured and is presented as a fold change compared to the MIC of the original strain  
573 passaged in the absence of peptide. **(B)** Peptide-resistant *E. coli* is susceptible to peptide  
574 activity during combination treatment with EDTA. MIC of *E. coli* strain selected for 20 passages  
575 from (A) was measured in presence of increasing concentrations of EDTA. Average of two  
576 independent experiments is presented.

577

578 **Figure 8. Model of interaction of TAT-RasGAP<sub>317-326</sub> with bacterial surface. (A)** The  
 579 positively charged peptide interacts with negative charges on bacterial surfaces. **(B)** This  
 580 interaction may be lowered by presence of divalent cations, which compete for the negative  
 581 charges of the LPS, or by mutations that decrease the net negative charge of LPS. **(C)**  
 582 Chemicals that target the bacterial outer membrane, such as EDTA and bacterial mutants with  
 583 defects in LPS biosynthesis are associated with increased susceptibility to TAT-RasGAP<sub>317-</sub>  
 584 <sub>326</sub>.

585

586

587

588

589 **Tables:**

590 **Table 1: *E. coli* MG1655, ATCC25922 and *P. aeruginosa* PA14 sensitivity to TAT-RasGAP<sub>317-326</sub> varies**  
 591 **depending on the growth medium used.** The indicated strains were grown overnight in LB, LB with 2 mM MgSO<sub>4</sub>  
 592 (LB Mg<sup>high</sup>), BM2 with 20 μM MgSO<sub>4</sub> (BM2 Mg<sup>low</sup>) or BM2 with 2 mM MgSO<sub>4</sub> (BM2 Mg<sup>high</sup>). Culture was then diluted  
 593 to OD<sub>600</sub> = 0.1 and grown for 1 hour. Bacterial suspension was further diluted 20 times for *E. coli* and 10 times for  
 594 *P. aeruginosa* and 10 μl was added per well of a 96-well plate containing serial dilutions of TAT-RasGAP<sub>317-326</sub> or  
 595 polymyxin B. OD<sub>590</sub> was measured after 16 hours of incubation. MIC is defined as the lowest concentration of  
 596 TAT-RasGAP<sub>317-326</sub> that completely inhibits bacterial proliferation. IC<sub>50</sub> is defined as the concentration required to  
 597 inhibit 50% of growth and was calculated using GraphPad Prism 8. The detailed growth curves are presented in  
 598 Supplementary Fig. 1 to 3.

599

|                           | Medium                 | TAT-RasGAP <sub>317-326</sub> |                       | Polymyxin B |                          |
|---------------------------|------------------------|-------------------------------|-----------------------|-------------|--------------------------|
|                           |                        | MIC (μM)                      | IC <sub>50</sub> (μM) | MIC (μg/ml) | IC <sub>50</sub> (μg/ml) |
| <i>E. coli</i> MG1655     | LB                     | 8                             | 3                     | 1           | 0.6                      |
|                           | LB Mg <sup>high</sup>  | 32                            | 16.3                  | 2           | 0.6                      |
|                           | BM2 Mg <sup>low</sup>  | 0.5                           | 0.3                   | 2           | 1.0                      |
|                           | BM2 Mg <sup>high</sup> | 4                             | 2                     | 2           | 0.8                      |
| <i>E. coli</i> ATCC 25922 | LB                     | 8                             | 5.2                   | 2           | 1.8                      |
|                           | LB Mg <sup>high</sup>  | 128                           | 52                    | 4           | 2.7                      |
| <i>P. aeruginosa</i> PA14 | LB                     | 32                            | 7.2                   | 4           | 2.1                      |
|                           | LB Mg <sup>high</sup>  | 64                            | 20.8                  | 2           | 1.0                      |
|                           | BM2 Mg <sup>low</sup>  | 4                             | 1.7                   | 4           | 1.0                      |
|                           | BM2 Mg <sup>high</sup> | 32                            | 10.1                  | 1           | 0.5                      |

600

601

602 **Table 2: List of two-component systems, for which deletion of at least one of the components caused**  
 603 **increased sensitivity to TAT-RasGAP<sub>317-326</sub>.** Data were extracted from the Keio collection screening and genes  
 604 annotated as two-component system components and showing increased sensitivity for both duplicates were  
 605 selected. Systems are highlighted in bold when both components were retrieved in the screening. Conditions  
 606 regulating the systems were extracted from the Ecocyc.org database.  
 607

| Two-component system    | Component(s), which deletion cause(s) sensitivity | Conditions regulating the system | Potential link(s) with resistance (Ref)                                                                     |
|-------------------------|---------------------------------------------------|----------------------------------|-------------------------------------------------------------------------------------------------------------|
| <i>baeSR</i>            | <i>baeS</i> (Sensory kinase)                      | Envelope stress                  | Overexpression of <i>baeR</i> causes resistance to novobiocin and deoxycholate (Baranova and Nikaido, 2002) |
| <b><i>citAB</i></b>     | <i>citB</i> (DNA binding)                         | Citrate/anaerobic conditions     |                                                                                                             |
| <i>cpxAR</i>            | <i>cpxA</i> (Sensory kinase)                      | Inner membrane stress            | Upregulates multidrug resistance cascade (Weatherspoon-Griffin et al., 2014)                                |
| <b><i>creCB</i></b>     | <b>Both</b>                                       | Carbone source                   | Hyperactivation causes colicin E2 tolerance (Cariss et al., 2010)                                           |
| <b><i>dcuSR</i></b>     | <b>Both</b>                                       | Dicarboxylate                    |                                                                                                             |
| <b><i>envZ-ompR</i></b> | <b>Both</b>                                       | Medium osmolality                |                                                                                                             |
| <i>kdpDE</i>            | <i>kdpD</i> (Sensory kinase)                      | Potassium concentration          |                                                                                                             |
| <b><i>phoQP</i></b>     | <b>Both</b>                                       | Low magnesium                    | Involved in resistance to AMPs (Bader et al., 2005)                                                         |
| <b><i>rcsBC</i></b>     | <i>rscC</i> (Sensory kinase)                      | Envelope stress                  | Contributes to intrinsic antibiotic resistance (Laubacher and Ades, 2008)                                   |

608

609

610 **Table 3: Genes found as more sensitive in both *P. aeruginosa* by transposon library screening and in *E.***  
 611 ***coli* by Keio collection screening.** List of the genes, whose disruption generated mutant strains found as sensitive  
 612 in transposon library screening in *P. aeruginosa* and whose orthologues in *E. coli* were detected as sensitive in  
 613 Keio collection screening. Transposon mutants of *P. aeruginosa* were incubated in presence or absence of 0.5  $\mu$ M  
 614 TAT-RasGAP<sub>317-326</sub> in BM2 Mg<sup>low</sup> medium for 12 generations. Transposon junctions were amplified and sequenced.  
 615 Fold change (FC) between abundance of transposon mutants with incubation in absence (BM2) or presence  
 616 (TAT-RasGAP) of the peptide was calculated and values are presented as Log<sub>2</sub> of the FC. Inf indicates that no  
 617 mutant was detected upon peptide treatment, and therefore Log<sub>2</sub> of the FC could not be calculated. Shown also  
 618 are results obtained in a former study using the same transposon library that indicate which gene disruptions also  
 619 cause hypersensitivity to polymyxin B (Vitale et al., 2020). Ratio in Keio screening column indicates whether  
 620 sensitivity was detected in one (1/2) or both (2/2) replicates of the Keio collections.

621

| Locus_tag  | Gene_symbol | Description                                                    | Category                       | Log <sub>2</sub> (FC_BM2vsTAT-RasGAP) | Hypersensitivity to Polymyxin B | <i>E. coli</i> homologues |
|------------|-------------|----------------------------------------------------------------|--------------------------------|---------------------------------------|---------------------------------|---------------------------|
| PA14_41260 | <i>parR</i> | two-component response regulator                               | Two-component regulator system | -4.268533546                          | Yes                             | <i>rstA</i>               |
| PA14_41270 | <i>parS</i> | two-component sensor                                           | Two-component regulator system | Inf                                   | Yes                             | <i>rstB</i>               |
| PA14_49180 | <i>phoP</i> | two-component response regulator PhoP                          | Two-component regulator system | Inf                                   | Yes                             | <i>phoP</i>               |
| PA14_63160 | <i>pmrB</i> | PmrB: two-component regulator system signal sensor kinase PmrB | Two-component regulator system | -3.492272393                          | Yes                             | <i>qseC</i>               |
| PA14_02390 |             | transcriptional regulator                                      | Transcription regulation       | -5.436478184                          |                                 | <i>cynR</i>               |
| PA14_71970 | <i>wbpW</i> | GDP-mannose pyrophosphorylase                                  | LPS biosynthesis               | -4.335647742                          |                                 | <i>cpsB</i>               |

622

623

624

625

626

627

628

629

630

631

632

633

634

635

636

637

638

639

640



641 **Table 4: MICs of TAT-RasGAP<sub>317-326</sub>-resistant strains towards other AMPs.** Fold change of MICs between the  
642 original strains (*E. coli* MG1655, *P. aeruginosa* PA14, *S. capitis* and *S. aureus* ATCC 29213) and strains exposed  
643 to increasing concentrations of TAT-RasGAP<sub>317-326</sub> for 20 passages. MICs were measured as described for Fig. 1.  
644 n.d.: MIC of the strain could not be determined.

645

|                      | TAT-RasGAP <sub>317-326</sub> | Polymyxin B | Melittin | LL-37 |
|----------------------|-------------------------------|-------------|----------|-------|
| <i>E. coli</i>       | 16                            | 0.5         | 0.5      | 0.5   |
| <i>P. aeruginosa</i> | 4                             | 2           | >2       | n.d.  |
| <i>S. capitis</i>    | 32                            | >2          | 2        | n.d.  |
| <i>S. aureus</i>     | >2                            | n.d.        | 8        | n.d.  |

646

## 647 **Material and methods**

### 648 **Strains, growth conditions and chemicals**

649 *E. coli* strains K-12 MG1655, ATCC 25922 and BW25113 were grown in LB or Basal  
650 Medium 2 (BM2; 62 mM potassium phosphate buffer [pH 7.0], 7 mM (NH<sub>4</sub>)<sub>2</sub>SO<sub>4</sub>, 10 μM FeSO<sub>4</sub>,  
651 0.4% (wt/v) glucose and 0.5% tryptone) with high (2 mM) or low (20 μM) concentration of  
652 magnesium (MgSO<sub>4</sub>) (Fernandez et al., 2012). *Pseudomonas aeruginosa* strain PA14 was  
653 grown either in LB or BM2 medium. *Staphylococcus capitis* (Heulot et al., 2017) and *S. aureus*  
654 (ATCC 29213) strains were grown in tryptic soy broth (TSB) (Missiakas and Schneewind,  
655 2013). All strains were stored at -80°C, in their respective medium, supplemented with ~25%  
656 glycerol. When required, antibiotics were added at final concentrations of 50 μg/mL  
657 (kanamycin), 20 μg/mL (gentamycin), or 100 μg/mL (carbenicillin). The retro-inverse TAT-  
658 RasGAP<sub>317-326</sub> peptide (amino acid sequence DTRLNTVWMWGGRRRQRRKRG) and the N-  
659 terminal FITC-labelled version of this peptide were synthesized by SBS Genetech (Beijing,  
660 China) and stored at -20°C. Chemicals were purchased from Sigma-Aldrich (St-Louis, MO,  
661 USA), unless otherwise specified.

662

### 663 **MIC measurements**

664 The minimum inhibitory concentration (MIC) of peptide was defined as the lowest  
665 concentration of peptide that resulted in no visible growth. Overnight cultures were diluted to  
666 OD<sub>600</sub> = 0.1 and grown with shaking at 37°C for 1 hour. MICs were measured by diluting these  
667 cultures (1:20 for LB and TSB cultures and 1:8 for BM2 cultures) and then adding these  
668 dilutions to 2-fold sequential dilutions of the peptides in 96-well plates. Volume of media (with  
669 peptide) per well was 100 μl and 10 μl of diluted cultures were added to each well. Cell growth  
670 was monitored via OD<sub>590</sub> measurement after overnight growth with shaking at 37°C. OD<sub>590</sub>  
671 readings were measured by FLUOstar Omega microplate reader (BMG Labtech, Ortenberg,  
672 Germany). Peptide-free growth control wells and bacteria-free contamination control wells

673 were included. First concentration at which no bacterial growth could be detected was defined  
674 as the MIC.

675 For MIC measurements in presence of *E. coli* LPS or EDTA, the indicated concentrations  
676 of these substances were dissolved in LB and distributed in 96-well plates prior to addition of  
677 the peptides. OD<sub>590</sub> measurements of control wells without peptides were used to calculate  
678 the percentage of growth in presence of EDTA.

679

### 680 **Growth curves**

681 Overnight cultures were diluted to OD<sub>600</sub> = 0.1 and grown with shaking at 37°C for 1  
682 hour, before addition of peptide. Cell growth was monitored via OD<sub>600</sub> measurement by  
683 Novaspec II Visible spectrophotometer (Pharmacia LKB Biotechnology, Cambridge, England)  
684 at 2, 4 and 6 hours.

685 Combinations of antimicrobial peptides were tested using the above methods and  
686 combining “half” concentrations of the different peptides (2 μM TAT-RasGAP<sub>317-326</sub>, 64 μg/ml  
687 melittin, 32 μg/ml LL-37 or 1 μg/ml polymyxin B) to produce supplementary Figure 6C.

688

### 689 **CFU measurements**

690 Overnight cultures were diluted to OD<sub>600</sub> = 0.1 and grown with shaking at 37°C for 1  
691 hour, before addition of the peptide. Each time point was taken by removing 10 μl and  
692 performing 10-fold serial dilutions. Dilutions of each condition were then plated in the absence  
693 of peptide and grown at 37°C overnight. CFU were measured by counting the number of  
694 colonies on the plates after overnight incubation.

695

### 696 **Confocal microscopy**

697 Overnight cultures of *E. coli* MG1655 were diluted to OD<sub>600</sub> = 0.1, grown for 1 hour,  
698 incubated for 1 hour with 10 μM FITC-labelled TAT-RasGAP<sub>317-326</sub>, stained with 5 μg/ml FM4-  
699 64 and fixed with 4% paraformaldehyde solution. Incubation with DAPI was subsequently

700 performed and pictures were acquired on a LSM710 confocal microscope (Zeiss, Oberkochen,  
701 Germany). Images were analyzed with ImageJ software (Schneider et al., 2012).

702

### 703 **Electron microscopy**

704 Bacteria were fixed with 2.5% glutaraldehyde solution (EMS, Hatfield, PA) in Phosphate  
705 Buffer (PB 0.1 M pH 7.4) for 1 hour at room temperature. Then, bacterial samples were  
706 incubated in a freshly prepared mix of 1% osmium tetroxide (EMS) and 1.5% potassium  
707 ferrocyanide in phosphate buffer for 1 hour at room temperature. The samples were then  
708 washed three times in distilled water and spun down in 2% low melting agarose, solidified on  
709 ice, cut into 1 mm<sup>3</sup> cubes and dehydrated in acetone solution at graded concentrations (30%  
710 for 40 minutes; 50% for 40 minutes; 70% for 40 minutes and 100% for 3 times 1 hour). This  
711 was followed by infiltration in Epon at graded concentrations (Epon 1/3 acetone for 2 hours;  
712 Epon 3/1 acetone for 2 hours, Epon 1/1 for 4 hours and Epon 1/1 for 12 hours) and finally  
713 polymerization for 48 hours at 60°C in a laboratory oven. Ultrathin sections of 50 nm were cut  
714 on a Leica Ultramicrotome (Leica Mikrosysteme GmbH, Vienna, Austria) and placed on a  
715 copper slot grid 2x1mm (EMS) coated with a polystyrene film. The bacterial sections were  
716 stained in 4% uranyl acetate for 10 minutes, rinsed several times with water, then incubated  
717 in Reynolds lead citrate and finally rinsed several times with water before imaging.

718 Micrographs (10x10 tiles) with a pixel size of 1.209 nm over an area of 40x40 µm were  
719 taken with a transmission electron microscope Philips CM100 (Thermo Fisher Scientific,  
720 Waltham, MA) at an acceleration voltage of 80kV with a TVIPS TemCam-F416 digital camera  
721 (TVIPS GmbH, Gauting, Germany). Large montage alignments were performed using  
722 Blendmont command-line program from the IMOD software (Kremer et al., 1996) and treated  
723 with ImageJ software.

724

### 725 **Flow cytometry**

726 Overnight cultures of *E. coli* MG1655 were diluted 1:100 and grown to mid exponential  
727 phase (OD<sub>600</sub> = 0.4-0.6) with shaking at 37°C. Each culture was then diluted to OD<sub>600</sub> = 0.1,

728 grown with shaking at 37°C for 1 hour and then treated with 10 µM FITC-labelled peptide for  
729 1 hour. Following peptide treatment, bacterial cells were washed in PBS and diluted 1:5 before  
730 acquisition on a CytoFLEX benchtop flow cytometer (Beckman Coulter). For each sample,  
731 10,000 events were collected and analyzed. Extracellular fluorescence was quenched with  
732 0.2% Trypan Blue (TB). TB is an efficient quencher of extracellular fluorescence (Sahlin et al.,  
733 1983, Loike and Silverstein, 1983, Jevprasesphant et al., 2004, Wan et al., 1993) and allows  
734 quantification of fluorescent signal from intracellular peptide (not subject to quenching by TB).  
735 P values were calculated using ratio paired t-test.

736

### 737 **RNA-Seq**

738 Overnight cultures of *E. coli* MG1655 were diluted to OD<sub>600</sub> = 0.1 and grown with shaking  
739 at 37°C for one hour to mid exponential phase (OD<sub>600</sub> = 0.4-0.6). Cultures were then treated  
740 with TAT-RasGAP<sub>317-326</sub> (10 µM) or left untreated (negative control), and grown with shaking  
741 at 37°C for an additional hour. For RNA extraction, protocol 1 in the RNeasy Protect Bacteria  
742 Reagent Handbook (Enzymatic lysis of bacteria) was followed using the RNeasy Plus Mini Kit  
743 (Qiagen) using TE buffer (10 mM Tris-HCl, 1 mM EDTA, pH 8.0) containing 1 mg/ml lysozyme  
744 (AppliChem, Chicago, IL). In the last step, RNA was eluted in 30 µl RNase-free water. Next,  
745 any contaminating DNA was removed using the DNA-free™ DNA Removal Kit (Invitrogen,  
746 Carlsbad, CA). 10x DNase buffer was added to the 30 µl eluted RNA with 2 µl rDNase I. This  
747 mix was incubated for 30 minutes at 37°C followed by rDNase I inactivation with 7 µl DNase  
748 Inactivation Reagent for 2 minutes with shaking (700 rpm) at room temperature. Samples were  
749 then centrifuged for 90 seconds at 10,000 x g, supernatant was transferred to a new tube, and  
750 stored at -80°C. Integrity of the samples was verified using the Standard Sensitivity RNA  
751 Analysis kit (Advanced Analytical, Ankeny, IA) with the Fragment Analyser Automated CE  
752 System (Labgene Scientific, Châtel-Saint-Denis, Switzerland). Samples that met RNA-Seq  
753 requirements were further processed and sent for sequencing. Preparation of the libraries and  
754 Illumina HiSeq platform (1x50 bp) sequencing were performed by Fasteris (Plan-les-Ouates,

755 Switzerland). Raw reads were trimmed with trimmomatic version 0.36 (Bolger et al., 2014)  
756 (parameters: ILLUMINACLIP: NexteraPE-PE.fa:3:25:6, LEADING: 28, TRAILING: 28  
757 MINLEN: 30). Trimmed reads were mapped to the genome of *E. coli* K-12 MG1655  
758 (accession: NC\_000913.3) with bwa mem version 0.7.17 (<https://arxiv.org/abs/1303.3997>)  
759 using default parameters. Htseq version 0.11.2 (Anders et al., 2015) was used to count reads  
760 aligned to each gene (parameters: --stranded=no -t gene). Normalized expression values  
761 were calculated as Reads Per Kilobase of transcript per Million mapped reads (RPKM) with  
762 edgeR (Robinson et al., 2010).

763

### 764 **Keio collection screening**

765 Deletion mutants from the Keio collection (Baba et al., 2006, Yamamoto et al., 2009) were  
766 used, along with the corresponding wild-type, which was added as a control on each test plate.  
767 Overnight cultures were diluted 1:100 in LB medium. Bacteria were incubated at 37°C for 1  
768 hour before adding TAT-RasGAP<sub>317-326</sub> (5 µM final concentration). Plates were incubated  
769 statically at 37°C and OD<sub>590</sub> was measured at 0 hour, 1.5 hour, 3 hours, 6 hours and 24 hours  
770 with FLUOstar Omega plate reader. Measurements were combined and analysed with R  
771 (version 3.6.1, (Team, 2019)). Data analysis and visualisation were performed with the *dplyr*  
772 (version 0.8.5) and *ggplot2* (version 3.3.0) packages from the *tidyverse* (version 1.3.0)  
773 environment. Since starting OD<sub>590</sub> (OD in equations) varied between strains and conditions,  
774 the OD<sub>590</sub> starting values in each well was subtracted from corresponding measurements  
775 made at time t in the presence (P) or absence (noP) of TAT-RasGAP<sub>317-326</sub>. For each strain,  
776  $NG_t^m(P)$ , the normalized growth value for a mutant strain at time t in the presence of the  
777 peptide was calculated with the following formula:

$$778 \quad NG_t^m(P) = \frac{OD_t^m(P) - OD_0^m(P)}{OD_t^m(noP) - OD_0^m(noP)}$$

779 Normalized growths of wild-type strain (mean WT), as presented on Fig. 4a and b were  
780 calculated by averaging normalized growths of all the wild-type controls performed (N=270).

781

782 To normalize the growth of a mutant (m) to the growth of control (c) bacteria (wild-type) on the  
783 same plate, the  $NG_t^m(\text{noP})$  factor was calculated with the following formula:

$$784 \quad NG_t^m(\text{noP}) = \frac{OD_t^m(\text{noP}) - OD_0^m(\text{noP})}{OD_t^c(\text{noP}) - OD_0^c(\text{noP})}$$

785 Gene ontology (GO) annotation (The Gene Ontology, 2019) was obtained from GO  
786 database (2020-09-01, “<http://current.geneontology.org/annotations>”) and assigned to the list  
787 of gene deletion inducing hypersensitivity with the GO.db package (version 3.10.0 (Carlson,  
788 2019)). GO IDs were assigned to each gene and the corresponding GO names were obtained  
789 with the “Term” function. Additionally, the same set of genes was subjected to KEGG pathways  
790 analysis (Kanehisa and Goto, 2000) with the KEGGREST package (version 1.26.1). Briefly,  
791 the KEGG orthology (KO) and KEGG pathway annotation were obtained from the KEGG  
792 database (Kanehisa, 2019) for *E. coli* K-12 MG1655 (eco). The code is available on Github  
793 ([https://github.com/njacquie/TAT-RasGAP\\_project](https://github.com/njacquie/TAT-RasGAP_project)).

794

### 795 ***Pseudomonas aeruginosa* PA14 transposon library screening**

796 The library of transposon (Tn) mutants in *P. aeruginosa* PA14 (Vitale et al., 2020) was  
797 grown in BM2 supplemented with 20  $\mu\text{M}$   $\text{MgSO}_4$  (Fernandez et al., 2012) and 0.2% L-  
798 rhamnose monohydrate (Sigma-Aldrich) in the absence or presence of 0.5  $\mu\text{M}$  TAT-  
799 RasGAP<sub>317-326</sub>. Following growth for 12 generations, genomic DNA (gDNA) was extracted with  
800 the GenElute Bacterial Genomic DNA Kit (Sigma-Aldrich). The transposon sequencing (Tn-  
801 seq) circle method (Gallagher et al., 2011, Gallagher et al., 2013) was employed to sequence  
802 the transposon junctions. Briefly, the gDNA was sheared to an average size of 300 bp  
803 fragments with a focused-ultrasonicator. The DNA fragments were repaired and ligated to  
804 adapters with the NEBNext Ultra II DNA Library Prep Kit for Illumina (New England Biolabs).  
805 Following restriction of the Tn with BamHI (New England Biolabs), the fragments were  
806 circularized by ligation and exonuclease treatment was applied to remove undesired non-

807 circularized DNAs (Gallagher et al., 2011). The Tn junctions were PCR amplified and  
808 amplicons were sequenced with the MiSeq Reagent Kit v2, 300-cycles (Illumina).

809 Following sequencing, the adapter sequences of the reads (.fastq) were trimmed with the  
810 command line “cutadapt -a adapter -q quality -o output.fastq.gz input.fastq.gz” (Martin, 2011).  
811 The software Tn-Seq Explorer (Solaimanpour et al., 2015) mapped the trimmed and paired  
812 reads onto the *P. aeruginosa* UCBPP-PA14 genome (Winsor et al., 2016), and determined  
813 the unique insertion density (UID, i.e. the number of unique Tn insertions divided per the length  
814 of the gene). The normalized UID between the treated and non-treated samples were  
815 compared and this ratio (log<sub>2</sub>-fold change, FC) was used to identify resistant determinants  
816 (log<sub>2</sub>-FC < - 1.0 and normalized UID > 0.0045).

817

#### 818 **Selection of resistant mutants**

819 Bacteria were grown in the corresponding medium, diluted 1:100 and cultured overnight  
820 with 0.5x MIC of TAT-RasGAP<sub>317-326</sub>. The subculture was diluted 1:100 and incubated with  
821 0.5x or 1x MIC overnight. Cells that successfully grew were diluted 1:100 in medium containing  
822 the same concentration or twice the concentration of peptide. Each dilution in fresh medium  
823 containing peptide is considered one passage. This process was repeated for up to 20  
824 passages.

825

826

827



## 828 References

- 829 AKBARI, R., HAKEMI-VALA, M., PASHAIE, F., BEVALIAN, P., HASHEMI, A. & POOSHANG  
830 BAGHERI, K. 2019. Highly Synergistic Effects of Melittin with Conventional Antibiotics Against  
831 Multidrug-Resistant Isolates of *Acinetobacter baumannii* and *Pseudomonas aeruginosa*.  
832 *Microb Drug Resist*, 25, 193-202.
- 833 ANDERS, S., PYL, P. T. & HUBER, W. 2015. HTSeq--a Python framework to work with high-throughput  
834 sequencing data. *Bioinformatics*, 31, 166-9.
- 835 ANNIBALDI, A., HEULOT, M., MARTINO, J. C. & WIDMANN, C. 2014. TAT-RasGAP317-326-  
836 mediated tumor cell death sensitization can occur independently of Bax and Bak. *Apoptosis*,  
837 19, 719-33.
- 838 ASHBURNER, M., BALL, C. A., BLAKE, J. A., BOTSTEIN, D., BUTLER, H., CHERRY, J. M., DAVIS,  
839 A. P., DOLINSKI, K., DWIGHT, S. S., EPPIG, J. T., HARRIS, M. A., HILL, D. P., ISSEL-  
840 TARVER, L., KASARSKIS, A., LEWIS, S., MATESE, J. C., RICHARDSON, J. E., RINGWALD,  
841 M., RUBIN, G. M. & SHERLOCK, G. 2000. Gene ontology: tool for the unification of biology.  
842 The Gene Ontology Consortium. *Nat Genet*, 25, 25-9.
- 843 BABA, T., ARA, T., HASEGAWA, M., TAKAI, Y., OKUMURA, Y., BABA, M., DATSENKO, K. A.,  
844 TOMITA, M., WANNER, B. L. & MORI, H. 2006. Construction of *Escherichia coli* K-12 in-frame,  
845 single-gene knockout mutants: the Keio collection. *Mol Syst Biol*, 2, 2006 0008.
- 846 BADER, M. W., SANOWAR, S., DALEY, M. E., SCHNEIDER, A. R., CHO, U., XU, W., KLEVIT, R. E.,  
847 LE MOUAL, H. & MILLER, S. I. 2005. Recognition of antimicrobial peptides by a bacterial  
848 sensor kinase. *Cell*, 122, 461-72.
- 849 BARANOVA, N. & NIKAIDO, H. 2002. The baeSR two-component regulatory system activates  
850 transcription of the yegMNOB (mdtABCD) transporter gene cluster in *Escherichia coli* and  
851 increases its resistance to novobiocin and deoxycholate. *J Bacteriol*, 184, 4168-76.
- 852 BARRAS, D., CHEVALIER, N., ZOETE, V., DEMPSEY, R., LAPOUGE, K., OLAYIOYE, M. A.,  
853 MICHIELIN, O. & WIDMANN, C. 2014a. A WXW motif is required for the anticancer activity of  
854 the TAT-RasGAP317-326 peptide. *J Biol Chem*, 289, 23701-11.
- 855 BARRAS, D., LORUSSO, G., LHERMITTE, B., VIERTL, D., RUEGG, C. & WIDMANN, C. 2014b.  
856 Fragment N2, a caspase-3-generated RasGAP fragment, inhibits breast cancer metastatic  
857 progression. *Int J Cancer*, 135, 242-7.
- 858 BARRAS, D., LORUSSO, G., RUEGG, C. & WIDMANN, C. 2014c. Inhibition of cell migration and  
859 invasion mediated by the TAT-RasGAP317-326 peptide requires the DLC1 tumor suppressor.  
860 *Oncogene*, 33, 5163-72.
- 861 BOCIEK, K., FERLUGA, S., MARDIROSSIAN, M., BENINCASA, M., TOSSI, A., GENNARO, R. &  
862 SCOCCHI, M. 2015. Lipopolysaccharide Phosphorylation by the WaaY Kinase Affects the  
863 Susceptibility of *Escherichia coli* to the Human Antimicrobial Peptide LL-37. *J Biol Chem*, 290,  
864 19933-41.
- 865 BOLGER, A. M., LOHSE, M. & USADEL, B. 2014. Trimmomatic: a flexible trimmer for Illumina  
866 sequence data. *Bioinformatics*, 30, 2114-20.
- 867 BROGDEN, K. A. 2005. Antimicrobial peptides: pore formers or metabolic inhibitors in bacteria? *Nat*  
868 *Rev Microbiol*, 3, 238-50.
- 869 CARISS, S. J., CONSTANTINIDOU, C., PATEL, M. D., TAKEBAYASHI, Y., HOBMAN, J. L., PENN, C.  
870 W. & AVISON, M. B. 2010. YieJ (CbrC) mediates CreBC-dependent colicin E2 tolerance in  
871 *Escherichia coli*. *J Bacteriol*, 192, 3329-36.
- 872 CARSLON, M. 2019. GO.db: A set of annotation maps describing the entire Gene Ontology.
- 873 CLIFTON, L. A., SKODA, M. W., LE BRUN, A. P., CIESIELSKI, F., KUZMENKO, I., HOLT, S. A. &  
874 LAKEY, J. H. 2015. Effect of divalent cation removal on the structure of gram-negative bacterial  
875 outer membrane models. *Langmuir*, 31, 404-12.
- 876 DEUTSCHER, J., FRANCKE, C. & POSTMA, P. W. 2006. How phosphotransferase system-related  
877 protein phosphorylation regulates carbohydrate metabolism in bacteria. *Microbiol Mol Biol Rev*,  
878 70, 939-1031.
- 879 DI SOMMA, A., MORETTA, A., CANE, C., CIRILLO, A. & DUILIO, A. 2020. Antimicrobial and Antibiofilm  
880 Peptides. *Biomolecules*, 10.
- 881 DOMINGUES, M. M., INACIO, R. G., RAIMUNDO, J. M., MARTINS, M., CASTANHO, M. A. & SANTOS,  
882 N. C. 2012. Biophysical characterization of polymyxin B interaction with LPS aggregates and  
883 membrane model systems. *Biopolymers*, 98, 338-44.
- 884 EDER, K., VIZLER, C., KUSZ, E., KARCAGI, I., GLAVINAS, H., BALOGH, G. E., VIGH, L., DUDA, E.  
885 & GYORFY, Z. 2009. The role of lipopolysaccharide moieties in macrophage response to  
886 *Escherichia coli*. *Biochem Biophys Res Commun*, 389, 46-51.

- 887 FERNANDEZ, L., GOODERHAM, W. J., BAINS, M., MCPHEE, J. B., WIEGAND, I. & HANCOCK, R.  
888 E. 2010. Adaptive resistance to the "last hope" antibiotics polymyxin B and colistin in  
889 *Pseudomonas aeruginosa* is mediated by the novel two-component regulatory system ParR-  
890 ParS. *Antimicrob Agents Chemother*, 54, 3372-82.
- 891 FERNANDEZ, L., JENSSEN, H., BAINS, M., WIEGAND, I., GOODERHAM, W. J. & HANCOCK, R. E.  
892 2012. The two-component system CprRS senses cationic peptides and triggers adaptive  
893 resistance in *Pseudomonas aeruginosa* independently of ParRS. *Antimicrob Agents*  
894 *Chemother*, 56, 6212-22.
- 895 FRANKLIN, M. J., NIVENS, D. E., WEADGE, J. T. & HOWELL, P. L. 2011. Biosynthesis of the  
896 *Pseudomonas aeruginosa* Extracellular Polysaccharides, Alginate, Pel, and Psl. *Front*  
897 *Microbiol*, 2, 167.
- 898 GALLAGHER, L. A., RAMAGE, E., PATRAPUVICH, R., WEISS, E., BRITTNACHER, M. & MANOIL, C.  
899 2013. Sequence-defined transposon mutant library of *Burkholderia thailandensis*. *mBio*, 4,  
900 e00604-13.
- 901 GALLAGHER, L. A., SHENDURE, J. & MANOIL, C. 2011. Genome-scale identification of resistance  
902 functions in *Pseudomonas aeruginosa* using Tn-seq. *mBio*, 2, e00315-10.
- 903 GENNARO, R., SKERLAVAJ, B. & ROMEO, D. 1989. Purification, composition, and activity of two  
904 bacterenecins, antibacterial peptides of bovine neutrophils. *Infect Immun*, 57, 3142-6.
- 905 HANCOCK, R. E. 1997. The bacterial outer membrane as a drug barrier. *Trends Microbiol*, 5, 37-42.
- 906 HANCOCK, R. E. W. 1984. Alterations in Outer-Membrane Permeability. *Annual Review of*  
907 *Microbiology*, 38, 237-264.
- 908 HASSAN, M., KJOS, M., NES, I. F., DIEP, D. B. & LOTFIPOUR, F. 2012. Natural antimicrobial peptides  
909 from bacteria: characteristics and potential applications to fight against antibiotic resistance. *J*  
910 *Appl Microbiol*, 113, 723-36.
- 911 HEINONEN, T., HARGRAVES, S., GEORGIEVA, M., WIDMANN, C. & JACQUIER, N. 2021. The  
912 antimicrobial peptide TAT-RasGAP317-326 inhibits the formation and the expansion of  
913 bacterial biofilms in vitro. *J Glob Antimicrob Resist*.
- 914 HEULOT, M., CHEVALIER, N., PUYAL, J., MARGUE, C., MICHEL, S., KREIS, S., KULMS, D.,  
915 BARRAS, D., NAHIMANA, A. & WIDMANN, C. 2016. The TAT-RasGAP317-326 anti-cancer  
916 peptide can kill in a caspase-, apoptosis-, and necroptosis-independent manner. *Oncotarget*,  
917 7, 64342-64359.
- 918 HEULOT, M., JACQUIER, N., AEBY, S., LE ROY, D., ROGER, T., TROFIMENKO, E., BARRAS, D.,  
919 GREUB, G. & WIDMANN, C. 2017. The Anticancer Peptide TAT-RasGAP317-326 Exerts  
920 Broad Antimicrobial Activity. *Front Microbiol*, 8, 994.
- 921 HONG, J., LU, X., DENG, Z., XIAO, S., YUAN, B. & YANG, K. 2019. How Melittin Inserts into Cell  
922 Membrane: Conformational Changes, Inter-Peptide Cooperation, and Disturbance on the  
923 Membrane. *Molecules*, 24.
- 924 JEVPRASEPHANT, R., PENNY, J., ATTWOOD, D. & D'EMANUELE, A. 2004. Transport of dendrimer  
925 nanocarriers through epithelial cells via the transcellular route. *J Control Release*, 97, 259-67.
- 926 KANEHISA, M. 2019. Toward understanding the origin and evolution of cellular organisms. *Protein Sci*,  
927 28, 1947-1951.
- 928 KANEHISA, M. & GOTO, S. 2000. KEGG: kyoto encyclopedia of genes and genomes. *Nucleic Acids*  
929 *Res*, 28, 27-30.
- 930 KANEHISA, M., SATO, Y., FURUMICHI, M., MORISHIMA, K. & TANABE, M. 2019. New approach for  
931 understanding genome variations in KEGG. *Nucleic Acids Res*, 47, D590-D595.
- 932 KONG, X. D., MORIYA, J., CARLE, V., POJER, F., ABRIATA, L. A., DEYLE, K. & HEINIS, C. 2020. De  
933 novo development of proteolytically resistant therapeutic peptides for oral administration. *Nat*  
934 *Biomed Eng*, 4, 560-571.
- 935 KREMER, J. R., MASTRONARDE, D. N. & MCINTOSH, J. R. 1996. Computer visualization of three-  
936 dimensional image data using IMOD. *J Struct Biol*, 116, 71-6.
- 937 KUMAR, P., KIZHAKKEDATHU, J. N. & STRAUS, S. K. 2018. Antimicrobial Peptides: Diversity,  
938 Mechanism of Action and Strategies to Improve the Activity and Biocompatibility In Vivo.  
939 *Biomolecules*, 8.
- 940 LAUBACHER, M. E. & ADES, S. E. 2008. The Rcs phosphorelay is a cell envelope stress response  
941 activated by peptidoglycan stress and contributes to intrinsic antibiotic resistance. *J Bacteriol*,  
942 190, 2065-74.
- 943 LAZAR, V., MARTINS, A., SPOHN, R., DARUKA, L., GREZAL, G., FEKETE, G., SZAMEL, M., JANGIR,  
944 P. K., KINTSES, B., CSORGO, B., NYERGES, A., GYORKEI, A., KINCSES, A., DER, A.,  
945 WALTER, F. R., DELI, M. A., URBAN, E., HEGEDUS, Z., OLAJOS, G., MEHI, O., BALINT, B.,

- 946 NAGY, I., MARTINEK, T. A., PAPP, B. & PAL, C. 2018. Antibiotic-resistant bacteria show  
947 widespread collateral sensitivity to antimicrobial peptides. *Nat Microbiol*, 3, 718-731.
- 948 LAZZARO, B. P., ZASLOFF, M. & ROLFF, J. 2020. Antimicrobial peptides: Application informed by  
949 evolution. *Science*, 368.
- 950 LEE, M. T., SUN, T. L., HUNG, W. C. & HUANG, H. W. 2013. Process of inducing pores in membranes  
951 by melittin. *Proc Natl Acad Sci U S A*, 110, 14243-8.
- 952 LEIVE, L. 1965. Release of lipopolysaccharide by EDTA treatment of *E. coli*. *Biochem Biophys Res*  
953 *Commun*, 21, 290-6.
- 954 LEON-BUITIMEA, A., GARZA-CARDENAS, C. R., GARZA-CERVANTES, J. A., LERMA-ESCALERA,  
955 J. A. & MORONES-RAMIREZ, J. R. 2020. The Demand for New Antibiotics: Antimicrobial  
956 Peptides, Nanoparticles, and Combinatorial Therapies as Future Strategies in Antibacterial  
957 Agent Design. *Front Microbiol*, 11, 1669.
- 958 LOIKE, J. D. & SILVERSTEIN, S. C. 1983. A fluorescence quenching technique using trypan blue to  
959 differentiate between attached and ingested glutaraldehyde-fixed red blood cells in  
960 phagocytosing murine macrophages. *J Immunol Methods*, 57, 373-9.
- 961 MACFARLANE, E. L., KWASNICKA, A., OCHS, M. M. & HANCOCK, R. E. 1999. PhoP-PhoQ  
962 homologues in *Pseudomonas aeruginosa* regulate expression of the outer-membrane protein  
963 OprH and polymyxin B resistance. *Mol Microbiol*, 34, 305-16.
- 964 MARTIN, M. 2011. Cutadapt removes adapter sequences from high-throughput sequencing reads.  
965 *EMBnet.journal*, 17, 10-12.
- 966 MCPHEE, J. B., LEWENZA, S. & HANCOCK, R. E. 2003. Cationic antimicrobial peptides activate a  
967 two-component regulatory system, PmrA-PmrB, that regulates resistance to polymyxin B and  
968 cationic antimicrobial peptides in *Pseudomonas aeruginosa*. *Mol Microbiol*, 50, 205-17.
- 969 MENDEZ-SAMPERIO, P. 2010. The human cathelicidin hCAP18/LL-37: a multifunctional peptide  
970 involved in mycobacterial infections. *Peptides*, 31, 1791-8.
- 971 MICHOD, D., ANNIBALDI, A., SCHAEFER, S., DAPPLES, C., ROCHAT, B. & WIDMANN, C. 2009.  
972 Effect of RasGAP N2 fragment-derived peptide on tumor growth in mice. *J Natl Cancer Inst*,  
973 101, 828-32.
- 974 MICHOD, D., YANG, J. Y., CHEN, J., BONNY, C. & WIDMANN, C. 2004. A RasGAP-derived cell  
975 permeable peptide potently enhances genotoxin-induced cytotoxicity in tumor cells. *Oncogene*,  
976 23, 8971-8.
- 977 MISSIAKAS, D. M. & SCHNEEWIND, O. 2013. Growth and laboratory maintenance of *Staphylococcus*  
978 *aureus*. *Curr Protoc Microbiol*, Chapter 9, Unit 9C 1.
- 979 O'NEILL, J. 2016. Tackling Drug-resistant Infections Globally: Final Report and Recommendations of  
980 the Review on Antimicrobial Resistance. In: GOVERNMENT, H. (ed.). London.
- 981 OGASAWARA, H., HASEGAWA, A., KANDA, E., MIKI, T., YAMAMOTO, K. & ISHIHAMA, A. 2007.  
982 Genomic SELEX search for target promoters under the control of the PhoQP-RstBA signal  
983 relay cascade. *J Bacteriol*, 189, 4791-9.
- 984 OLAITAN, A. O., MORAND, S. & ROLAIN, J. M. 2014. Mechanisms of polymyxin resistance: acquired  
985 and intrinsic resistance in bacteria. *Front Microbiol*, 5, 643.
- 986 PELLETIER, C., BOURLIOUX, P. & VAN HEIJENOORT, J. 1994. Effects of sub-minimal inhibitory  
987 concentrations of EDTA on growth of *Escherichia coli* and the release of lipopolysaccharide.  
988 *FEMS Microbiol Lett*, 117, 203-6.
- 989 ROBINSON, M. D., MCCARTHY, D. J. & SMYTH, G. K. 2010. edgeR: a Bioconductor package for  
990 differential expression analysis of digital gene expression data. *Bioinformatics*, 26, 139-40.
- 991 SAHLIN, S., HED, J. & RUNDQUIST, I. 1983. Differentiation between attached and ingested immune  
992 complexes by a fluorescence quenching cytofluorometric assay. *J Immunol Methods*, 60, 115-  
993 24.
- 994 SCHNEIDER, C. A., RASBAND, W. S. & ELICEIRI, K. W. 2012. NIH Image to ImageJ: 25 years of  
995 image analysis. *Nat Methods*, 9, 671-5.
- 996 SERULLA, M., ICHIM, G., STOJCESKI, F., GRASSO, G., AFONIN, S., HEULOT, M., SCHOBER, T.,  
997 ROTH, R., GODEFROY, C., MILHIET, P. E., DAS, K., GARCIA-SAEZ, A. J., DANANI, A. &  
998 WIDMANN, C. 2020. TAT-RasGAP317-326 kills cells by targeting inner-leaflet-enriched  
999 phospholipids. *Proc Natl Acad Sci U S A*.
- 1000 SOLAIMANPOUR, S., SARMIENTO, F. & MRAZEK, J. 2015. Tn-seq explorer: a tool for analysis of  
1001 high-throughput sequencing data of transposon mutant libraries. *PLoS One*, 10, e0126070.
- 1002 SPOHN, R., DARUKA, L., LAZAR, V., MARTINS, A., VIDOVICS, F., GREZAL, G., MEHI, O., KINTSES,  
1003 B., SZAMEL, M., JANGIR, P. K., CSORGO, B., GYORKEI, A., BODI, Z., FARAGO, A., BODAI,  
1004 L., FOLDESI, I., KATA, D., MAROTI, G., PAP, B., WIRTH, R., PAPP, B. & PAL, C. 2019.

- 1005 Integrated evolutionary analysis reveals antimicrobial peptides with limited resistance. *Nat*  
1006 *Commun*, 10, 4538.
- 1007 SRINIVAS, P. & RIVARD, K. 2017. Polymyxin Resistance in Gram-negative Pathogens. *Curr Infect Dis*  
1008 *Rep*, 19, 38.
- 1009 TEAM, R. C. 2019. R: A language and environment for statistical computing. .
- 1010 THE GENE ONTOLOGY, C. 2019. The Gene Ontology Resource: 20 years and still GOing strong.  
1011 *Nucleic Acids Res*, 47, D330-D338.
- 1012 TSOUTSOU, P., ANNIBALDI, A., VIERTL, D., OLLIVIER, J., BUCHEGGER, F., VOZENIN, M. C.,  
1013 BOURHIS, J., WIDMANN, C. & MATZINGER, O. 2017. TAT-RasGAP317-326 Enhances  
1014 Radiosensitivity of Human Carcinoma Cell Lines In Vitro and In Vivo through Promotion of  
1015 Delayed Mitotic Cell Death. *Radiat Res*, 187, 562-569.
- 1016 VITALE, A., PESSI, G., URFER, M., LOCHER, H. H., ZERBE, K., OBRECHT, D., ROBINSON, J. A. &  
1017 EBERL, L. 2020. Identification of Genes Required for Resistance to Peptidomimetic Antibiotics  
1018 by Transposon Sequencing. *Front Microbiol*, 11, 1681.
- 1019 WAN, C. P., PARK, C. S. & LAU, B. H. 1993. A rapid and simple microfluorometric phagocytosis assay.  
1020 *J Immunol Methods*, 162, 1-7.
- 1021 WANG, G., LI, X. & WANG, Z. 2016. APD3: the antimicrobial peptide database as a tool for research  
1022 and education. *Nucleic Acids Res*, 44, D1087-93.
- 1023 WEATHERSPOON-GRIFFIN, N., YANG, D., KONG, W., HUA, Z. & SHI, Y. 2014. The CpxR/CpxA two-  
1024 component regulatory system up-regulates the multidrug resistance cascade to facilitate  
1025 *Escherichia coli* resistance to a model antimicrobial peptide. *J Biol Chem*, 289, 32571-82.
- 1026 WINSOR, G. L., GRIFFITHS, E. J., LO, R., DHILLON, B. K., SHAY, J. A. & BRINKMAN, F. S. 2016.  
1027 Enhanced annotations and features for comparing thousands of *Pseudomonas* genomes in the  
1028 *Pseudomonas* genome database. *Nucleic Acids Res*, 44, D646-53.
- 1029 XHINDOLI, D., PACOR, S., BENINCASA, M., SCOCCHI, M., GENNARO, R. & TOSSI, A. 2016. The  
1030 human cathelicidin LL-37--A pore-forming antibacterial peptide and host-cell modulator.  
1031 *Biochim Biophys Acta*, 1858, 546-66.
- 1032 YADAVALLI, S. S., CAREY, J. N., LEIBMAN, R. S., CHEN, A. I., STERN, A. M., ROGGIANI, M., LIPPA,  
1033 A. M. & GOULIAN, M. 2016. Antimicrobial peptides trigger a division block in *Escherichia coli*  
1034 through stimulation of a signalling system. *Nat Commun*, 7, 12340.
- 1035 YAMAMOTO, N., NAKAHIGASHI, K., NAKAMICHI, T., YOSHINO, M., TAKAI, Y., TOUDA, Y.,  
1036 FURUBAYASHI, A., KINJYO, S., DOSE, H., HASEGAWA, M., DATSENKO, K. A.,  
1037 NAKAYASHIKI, T., TOMITA, M., WANNER, B. L. & MORI, H. 2009. Update on the Keio  
1038 collection of *Escherichia coli* single-gene deletion mutants. *Mol Syst Biol*, 5, 335.
- 1039 YETHON, J. A., HEINRICHS, D. E., MONTEIRO, M. A., PERRY, M. B. & WHITFIELD, C. 1998.  
1040 Involvement of waaY, waaQ, and waaP in the modification of *Escherichia coli*  
1041 lipopolysaccharide and their role in the formation of a stable outer membrane. *J Biol Chem*,  
1042 273, 26310-6.

1043

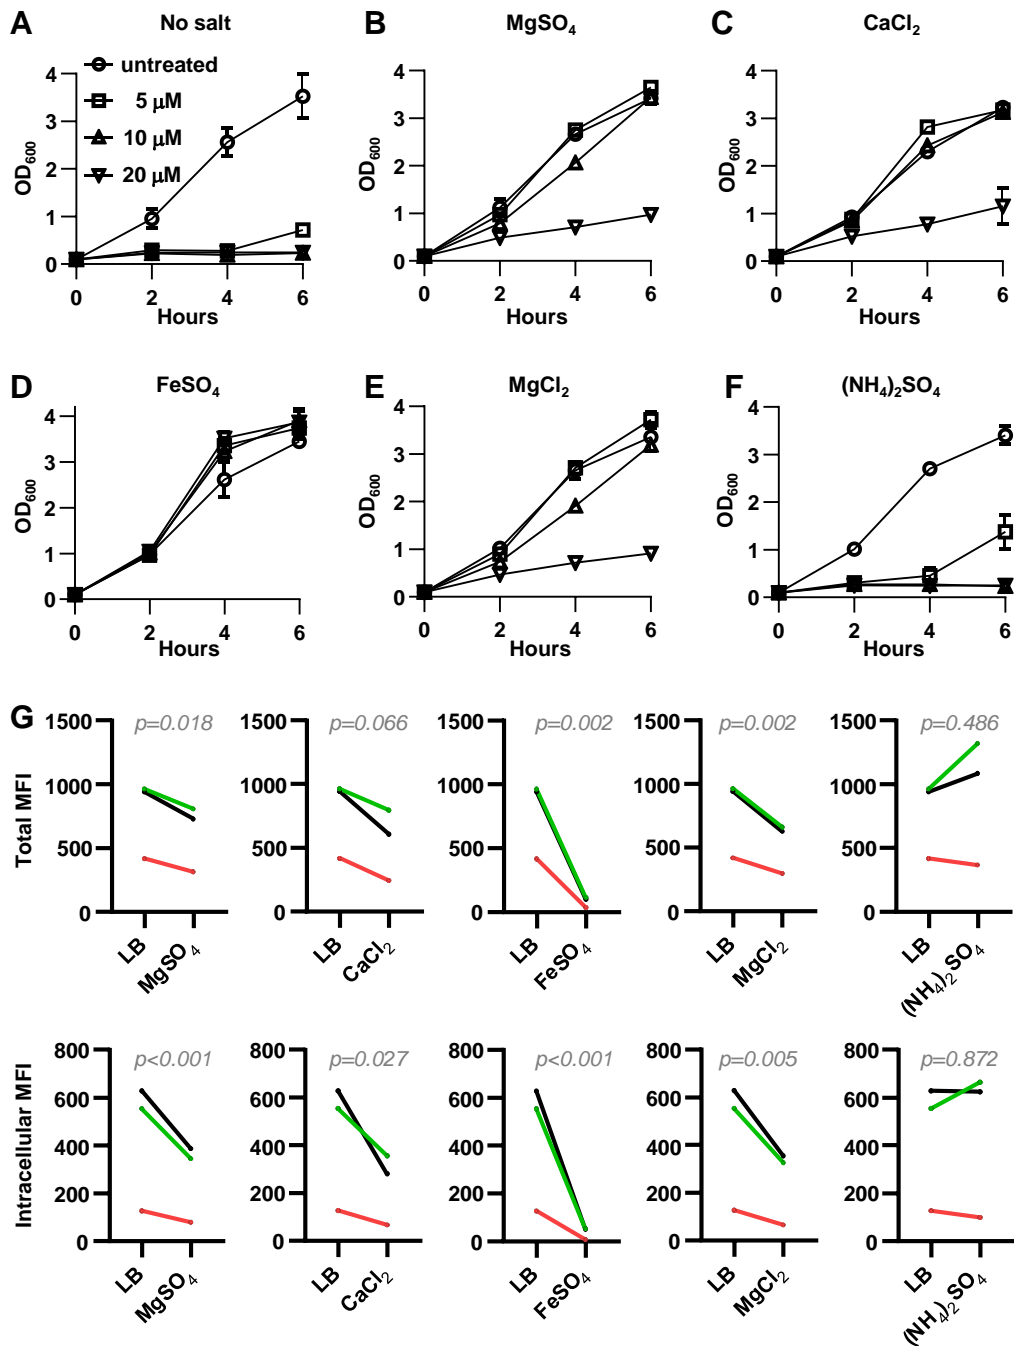

**Figure 1. Divalent cations affect bacterial sensitivity towards TAT-RasGAP<sub>317-326</sub> and decrease binding and entry of the peptide in *E. coli*.** (A-F) *E. coli* MG1655 were grown overnight at 37°C in LB supplemented with 2 mM of the indicated salt and diluted to OD<sub>600</sub> = 0.1. Bacterial suspension was then grown 1 hour at 37°C before addition of the indicated concentrations of TAT-RasGAP<sub>317-326</sub>. OD<sub>600</sub> was measured at the indicated times after the initial dilution. The results correspond to the mean  $\pm$  the range of two independent experiments. (G) *E. coli* MG1655 were grown overnight at 37°C in LB containing 2 mM of the indicated salts and diluted to OD<sub>600</sub> = 0.1. Bacterial binding and uptake of 10  $\mu$ M FITC-labelled TAT-RasGAP<sub>317-326</sub> was recorded in triplicate (each shown with a different color on the graph) via flow cytometry with (Intracellular) or without (Total) quenching with 0.2 % trypan blue. P values were calculated by ratio paired t-test between the indicated condition and the LB control.

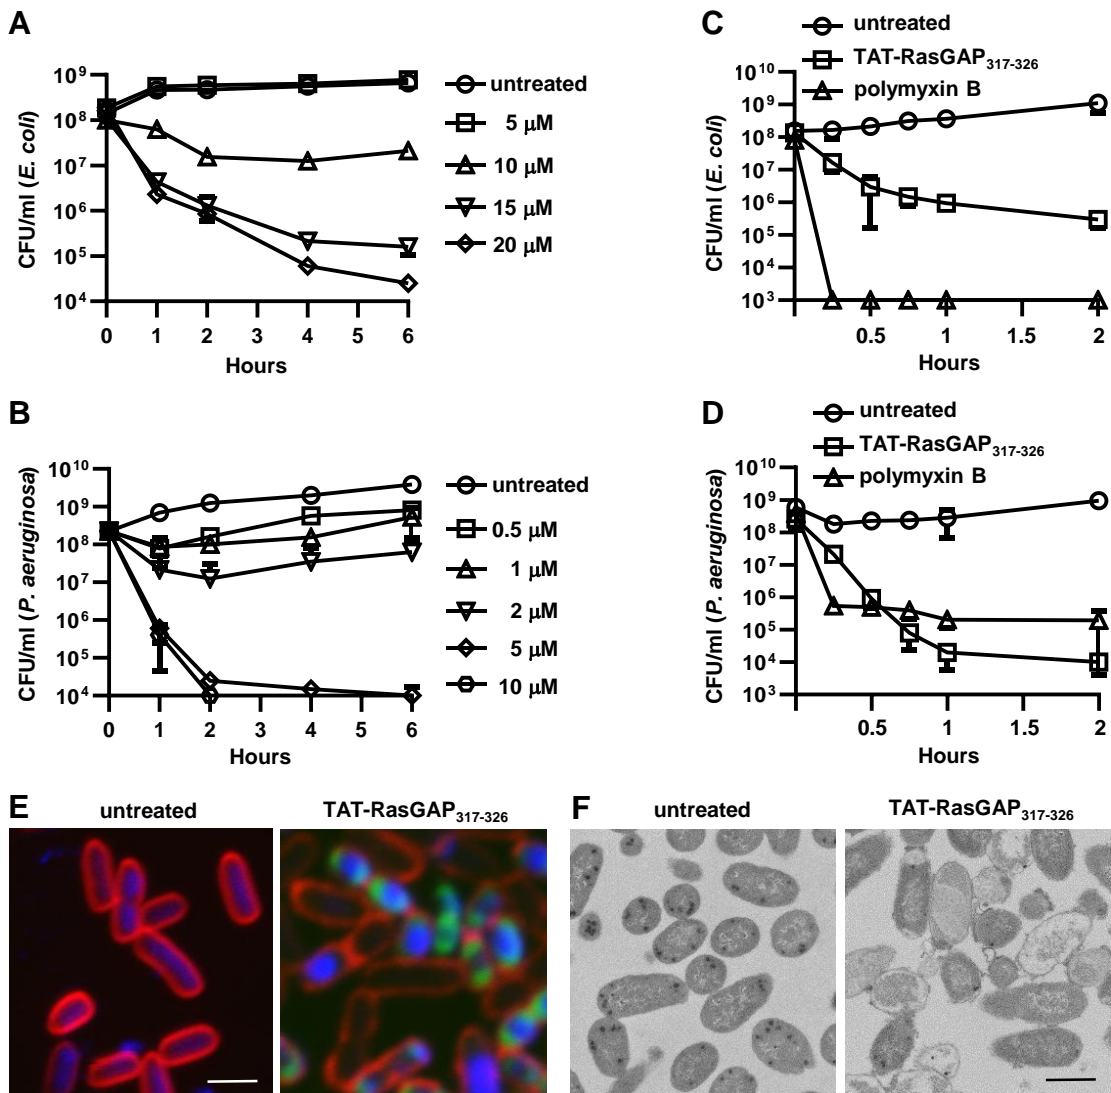

**Figure 2. TAT-RasGAP<sub>317-326</sub> is bactericidal against *E. coli* and *P. aeruginosa*.**

(A-B) Overnight cultures of *E. coli* MG1655 in LB (A) and *P. aeruginosa* PA14 in BM2 Mg<sup>low</sup> (B) were diluted to OD<sub>600</sub> = 0.1 and incubated at 37°C for 1 hour. TAT-RasGAP<sub>317-326</sub> was then added at the indicated concentrations. Samples were taken at the indicated time points, serially diluted 10-fold in fresh LB and plated on LB agar plates. Number of colony forming units per ml (CFU/ml) in the original culture was calculated. (C) *E. coli* cultures were treated as in (A). TAT-RasGAP<sub>317-326</sub> (20  $\mu$ M) or polymyxin B (2.5  $\mu$ g/ml) were added as indicated. Samples were taken at the indicated time points and CFU/ml were determined as in (A). (D) *P. aeruginosa* cultures were treated as in (B). TAT-RasGAP<sub>317-326</sub> (10  $\mu$ M) or polymyxin B (10  $\mu$ g/ml) were added as indicated. Samples were taken at the indicated time points and CFU/ml were determined as in (A). Panels A-D: the results correspond to the mean  $\pm$  standard deviation from at least two independent experiments. (E) *E. coli* MG1655 grown overnight and diluted to OD<sub>600</sub> = 0.1 were incubated for 1 hour with or without 20  $\mu$ M FITC-labelled TAT-RasGAP<sub>317-326</sub> (green). The bacteria were then labelled with 5  $\mu$ g/ml FM4-64 (red) and fixed with 4% paraformaldehyde. Incubation with DAPI (blue) was subsequently performed. Pictures were taken with a Zeiss LSM710 confocal microscope and analyzed using ImageJ software. Bar = 2  $\mu$ m. (F) *E. coli* bacteria treated for 1 hour with 20  $\mu$ M TAT-RasGAP<sub>317-326</sub> were fixed with glutaraldehyde and prepared for electron microscopy as described in Material and Methods section. Samples were imaged via transmission electron microscopy. Images were analyzed using ImageJ software. Bar = 2  $\mu$ m.

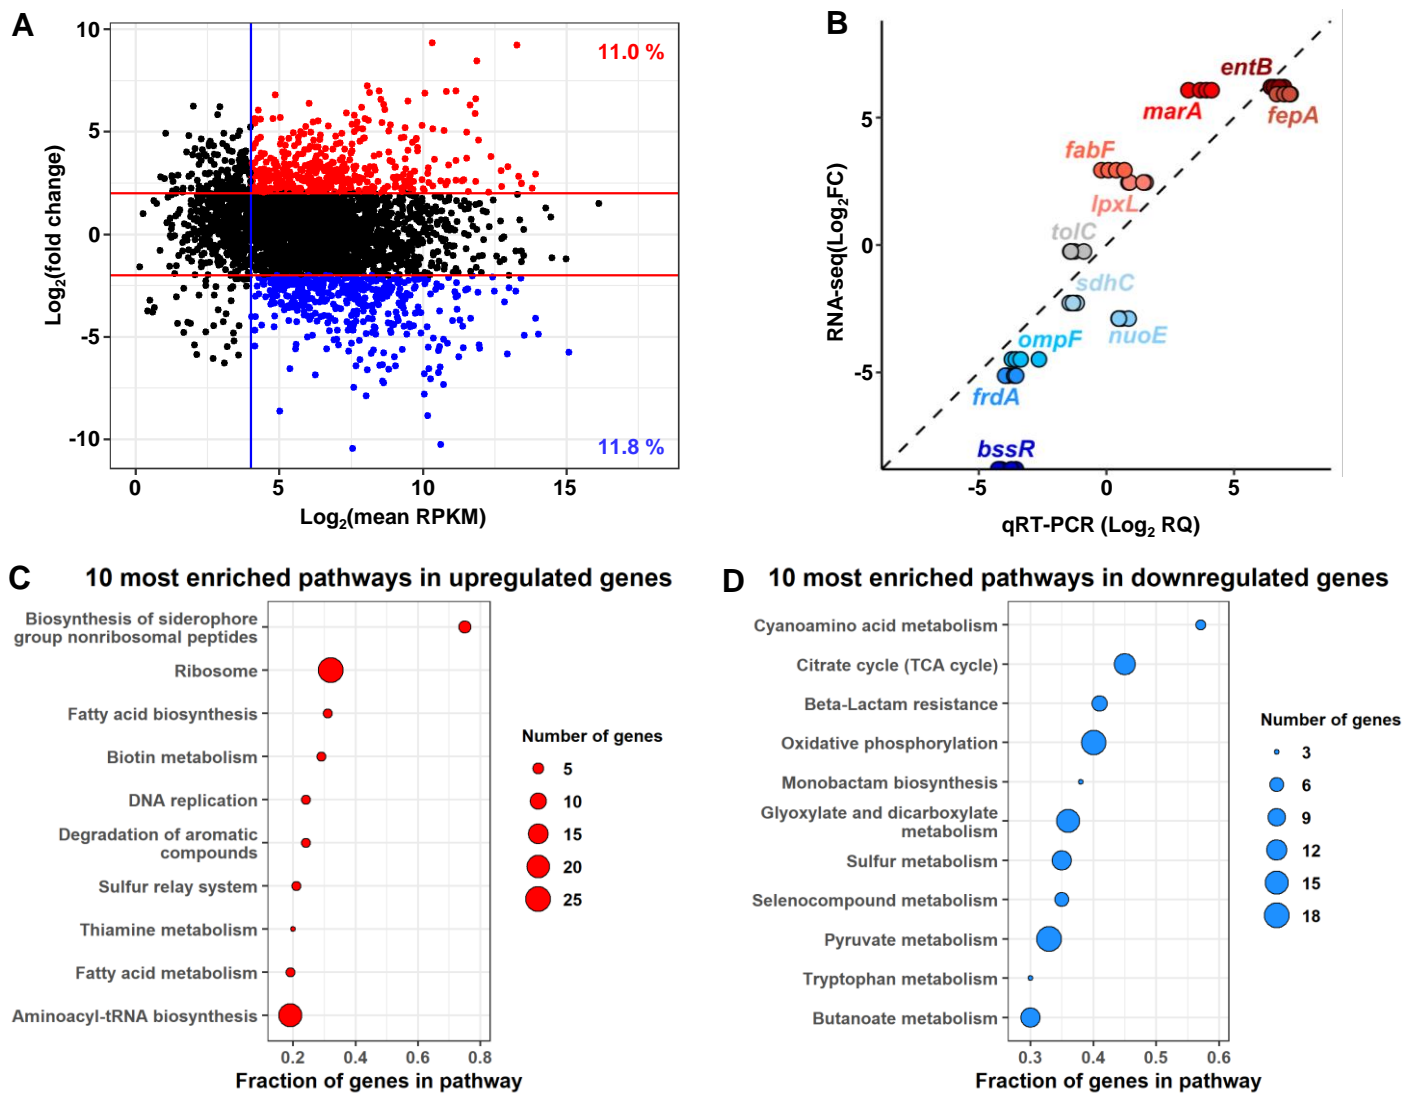

**Figure 3. TAT-RasGAP<sub>317-326</sub> alters the transcriptional landscape of *E. coli*.**

RNA-seq analysis was performed on *E. coli* MG1655 incubated for 1 hour with or without 10  $\mu\text{M}$  TAT-RasGAP<sub>317-326</sub>. **(A)** MA-plot of the average gene expression (x-axis, RPKM: read per kilobase million) vs the differential expression (y-axis). Threshold for gene expression is indicated with the blue vertical line. The red lines indicate the cut-off limit for upregulated (red dots) and downregulated (blue dots) genes. **(B)** Correlation between RNA-seq ( $\text{log}_2$  Fold Change) and qRT-PCR ( $\text{log}_2$  Relative Quantification) differential expression performed on RNA extracted from *E. coli* treated for one hour with or without 10  $\mu\text{M}$  TAT-RasGAP<sub>317-326</sub> for a set of genes detected by RNA-seq as downregulated by the peptide (blue), not changed (grey) or upregulated (red). Gene expression was measured in duplicates on two independent extracted RNA sets. **(C-D)** Fraction of KEGG pathway genes that are upregulated **(C)** or downregulated **(D)** after treatment with TAT-RasGAP<sub>317-326</sub>. Dot size indicates the number of genes in the selection.

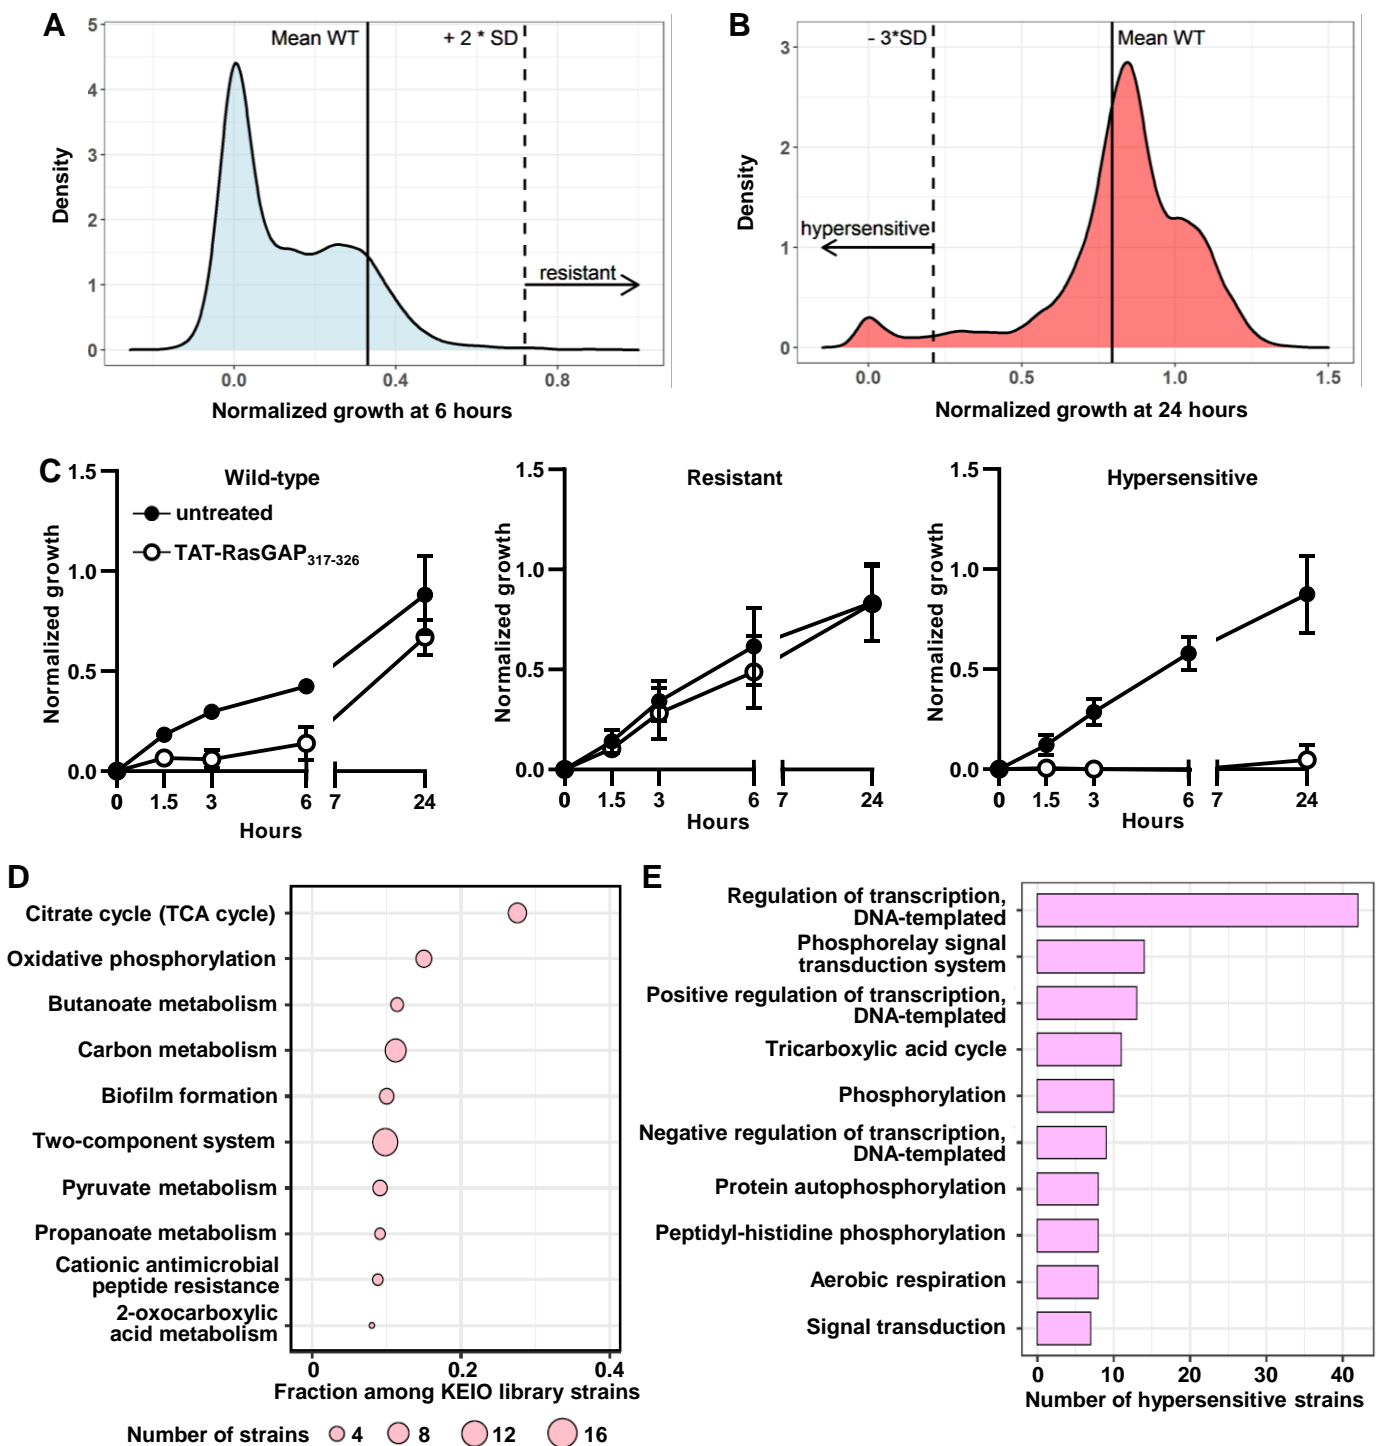

**Figure 4. Selection of hypersensitive and resistant *E. coli* deletion mutants from the KEIO collection.**

Deletion mutants and the corresponding wild-type strain were grown in LB medium with or without 5  $\mu$ M TAT-RasGAP<sub>317-326</sub>. OD<sub>590</sub> was measured at 0, 1.5, 3, 6, and 24 hours. **(A-B)** Distribution of the normalized growth (NG; see the methods for the calculation of NG) of bacteria incubated with TAT-RasGAP<sub>317-326</sub> at 6 hours **(A)** and 24 hours **(B)**. The mean NG of the wild-type strain (mean WT) is indicated with a vertical solid line. Strains with NG<sub>6 hours</sub> > [mean WT + 2 standard deviations (SDs)] and with NG<sub>24 hours</sub> < [mean WT - 3 SDs] are defined here as resistant and hypersensitive strains, respectively. **(C)** Growth curves of wild-type (n=270), hypersensitive (n=356) and resistant (n=20) mutants in presence or absence of 5  $\mu$ M TAT-RasGAP<sub>317-326</sub>. Data are mean  $\pm$  SD. **(D)** Top 10 most represented KEGG pathways among hypersensitive strains. The number of hypersensitive strains in each pathway was normalized to the number of KEIO collection strains in the corresponding pathway. **(E)** Biological processes GO term enrichment analysis with the 10 most represented terms among the hypersensitive strains.



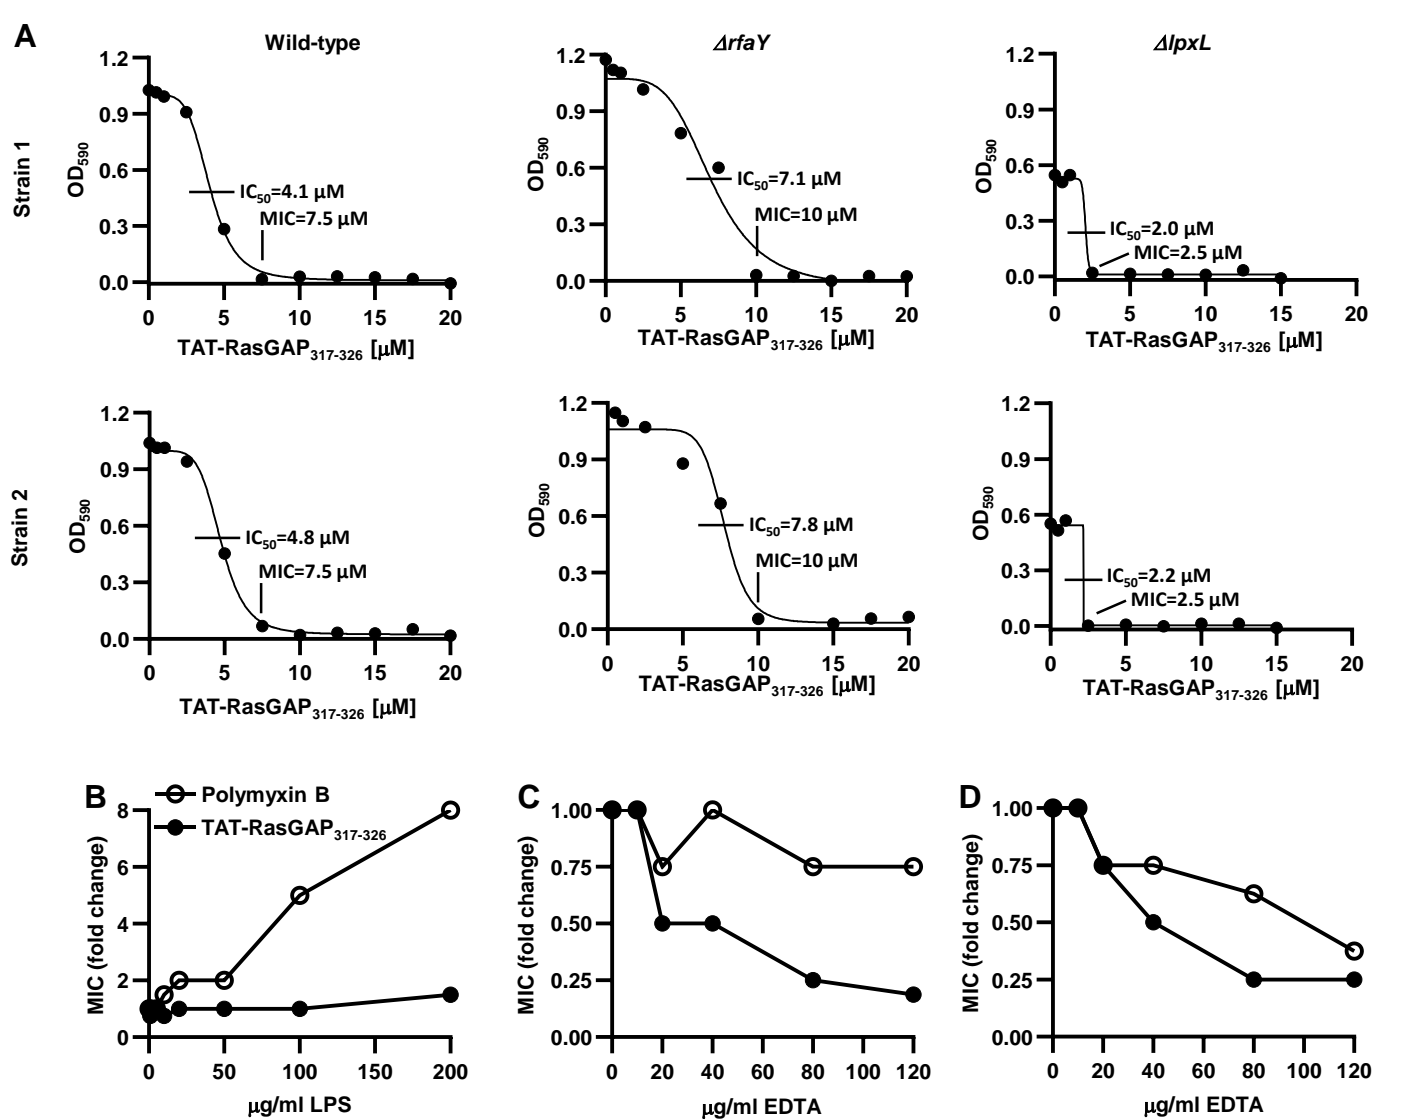

**Figure 5. Changes in LPS integrity influence TAT-RasGAP<sub>317-326</sub> activity. (A)** Deletion of LPS biosynthesis genes have diverse effect on TAT-RasGAP<sub>317-326</sub> activity. MICs and  $\text{IC}_{50}$  of TAT-RasGAP<sub>317-326</sub> against wild-type strain or the two deletion mutants  $\Delta rfaY$  resp.  $\Delta lpxL$  from the Keio deletion library were measured as previously described. **(B-D)** LPS supplementation or EDTA differentially influence activity of TAT-RasGAP<sub>317-326</sub> and polymyxin B. MICs of TAT-RasGAP<sub>317-326</sub> and polymyxin B on *E. coli* MG1655 (B-C) or ATCC25922 (D) were measured as previously described in LB containing the indicated concentrations of purified LPS or EDTA. Data are averages of two independent experiments.

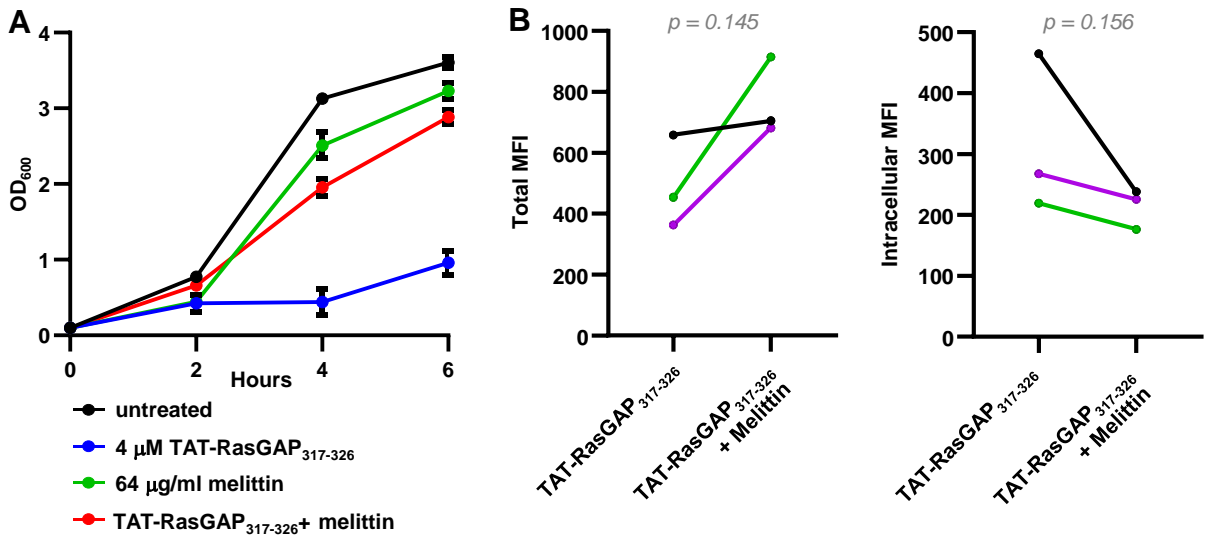

**Figure 6. Melittin has an inhibitory effect on TAT-RasGAP<sub>317-326</sub> activity.** (A) Sub-inhibitory concentrations of melittin interfere with TAT-RasGAP<sub>317-326</sub> activity. Indicated concentrations of AMPs were added and OD<sub>600</sub> was measured as previously described. Average and range of two independent experiments are shown. (B) *E. coli* MG1655 was grown overnight at 37°C, diluted to OD<sub>600</sub> = 0.1 and grown during 1 hour before addition or not of 10  $\mu$ M FITC-labelled TAT-RasGAP<sub>317-326</sub> with or without 64  $\mu$ g/ml melittin. Cells were incubated for 1 hour at 37°C, extracellular fluorescence was quenched (Intracellular) or not (Total) using 0.2% trypan blue before sample acquisition. Mean fluorescence intensities (MFI) were measured for triplicates (shown with different colors). P values were calculated using ratio paired t-test between the indicated conditions.

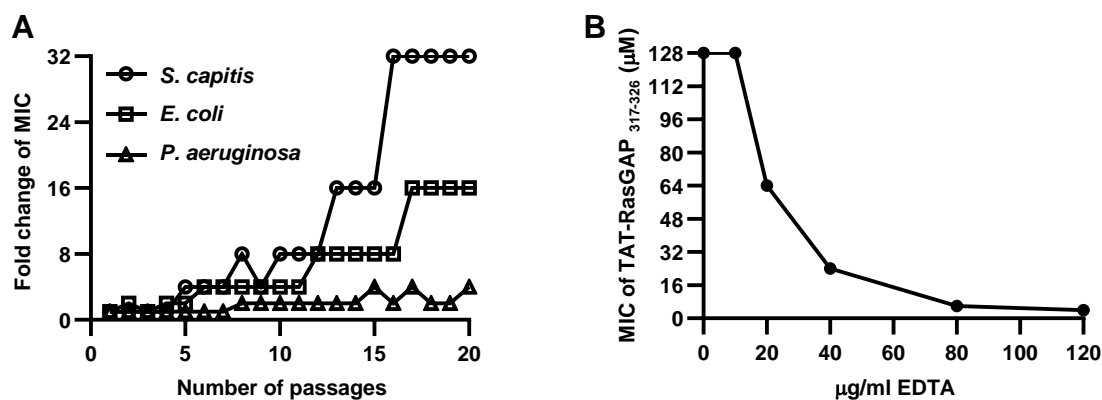

**Figure 7. Bacterial resistance against TAT-RasGAP<sub>317-326</sub> appears after selection with sub-inhibitory concentrations of peptide. (A)** The indicated strains were incubated in presence or absence of 0.5 MIC of TAT-RasGAP<sub>317-326</sub>. Cultures were then diluted each day in medium containing either the same concentration of the peptide or twice the concentration. Once bacterial growth was detected in the culture exposed to an elevated concentration of the peptide, the process was repeated thereby exposing the bacterial culture to sequentially increasing concentrations of peptide for a total of 20 passages. MIC of each passage was then measured and is presented as a fold change compared to the MIC of the original strain passaged in the absence of peptide. **(B)** Peptide-resistant *E. coli* is susceptible to peptide activity during combination treatment with EDTA. MIC of *E. coli* strain selected for 20 passages from (A) was measured in presence of increasing concentrations of EDTA. Average of two independent experiments is presented.

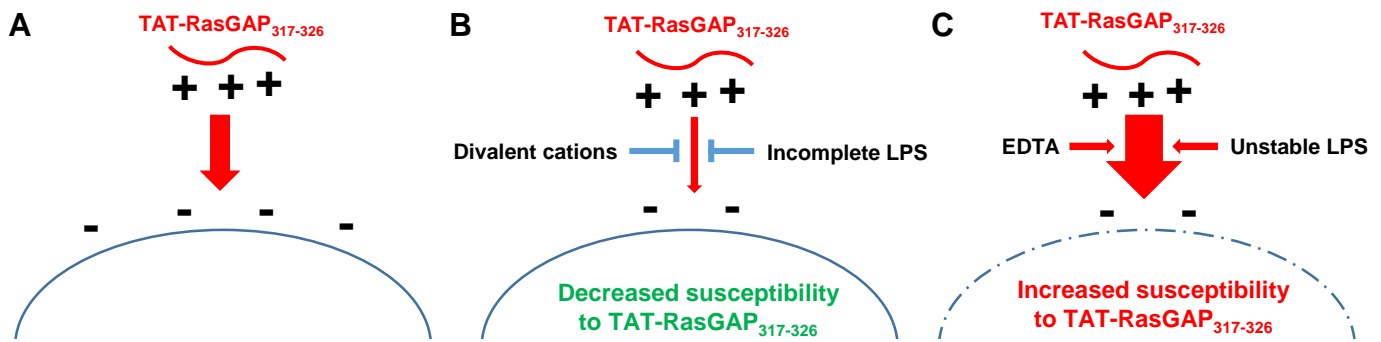

**Figure 8. Model of interaction of TAT-RasGAP<sub>317-326</sub> with bacterial surface.** (A) The positively charged peptide interacts with negative charges on bacterial surfaces. (B) This interaction may be lowered by presence of divalent cations, which compete for the negative charges of the LPS, or by mutations that decrease the net negative charge of LPS. (C) Chemicals that target the bacterial outer membrane, such as EDTA and bacterial mutants with defects in LPS biosynthesis are associated with increased susceptibility to TAT-RasGAP<sub>317-326</sub>.
